# Supplementary material for: Assessment of cold exposure-induced metabolic changes in mice using untargeted metabolomics
Source: Front Mol Biosci. 2023 Aug 31;10:1228771. doi: 10.3389/fmolb.2023.1228771 (PMC10500074; doi:10.3389/fmolb.2023.1228771)
Supplement: Supplementary file 1 [file Table3.XLSX]

## Sheet: Sheet1
	compound ID	compound name	CAS No.	molecular formula	molecular weight	retention index	smiles	inchi
BAT	1	L-Hydroxyproline, (E)-, 3TMS derivative	55429-66-8	C14H33NO3Si3	347.177	893.049	O[C@H]1CN[C@@H](C1)C(O)=O	InChI=1S/C5H9NO3/c7-3-1-4(5(8)9)6-2-3/h3-4,6-7H,1-2H2,(H,8,9)/t3-,4+/m1/s1
	2	1-Hydroxy-3-methoxy-6-methylanthraquinone, TMS derivative	1000103-00-3	C19H20O4Si	340.113	1146.03	COc1cc(O)c2C(=O)c3ccc(C)cc3C(=O)c2c1	InChI=1/C16H12O4/c1-8-3-4-10-11(5-8)15(18)12-6-9(20-2)7-13(17)14(12)16(10)19/h3-7,17H,1-2H3
	3	Methyl glycocholate, 3TMS derivative	57326-16-6	C36H69NO6Si3	695.443	1537.77
	4	Ethylphosphonic acid, 2TMS derivative	17882-98-3	C8H23O4PSi2	270.087	595.057	CC[P](O)(O)=O	InChI=1/C2H7O3P/c1-2-6(3,4)5/h2H2,1H3,(H2,3,4,5)/f/h3-4H
	5	1-Hexadecanol, TMS derivative	6221-90-5	C19H42OSi	314.3	1579.9	CCCCCCCCCCCCCCCCO	InChI=1/C16H34O/c1-2-3-4-5-6-7-8-9-10-11-12-13-14-15-16-17/h17H,2-16H2,1H3
	6	Cholest-4-en-3-ol, (3.beta.)-, TMS derivative	53084-65-4	C30H54OSi	458.394	1950.28	CC(C)CCC[C@@H](C)[C@H]1CC[C@H]2[C@@H]3CCC4=C[C@@H](O)CC[C@]4(C)[C@H]3CC[C@]12C	InChI=1/C27H46O/c1-18(2)7-6-8-19(3)23-11-12-24-22-10-9-20-17-21(28)13-15-26(20,4)25(22)14-16-27(23,24)5/h17-19,21-25,28H,6-16H2,1-5H3/t19-,21+,22+,23-,24+,25+,26+,27-/m1/s1
	7	Pregnane-3,20-diol, (3.alpha.,5.beta.,20S)-, 2TMS derivative	16134-56-8	C27H52O2Si2	464.351	353.785	C[C@H](O)[C@H]1CC[C@H]2[C@@H]3CC[C@@H]4C[C@H](O)CC[C@]4(C)[C@H]3CC[C@]12C	InChI=1/C21H36O2/c1-13(22)17-6-7-18-16-5-4-14-12-15(23)8-10-20(14,2)19(16)9-11-21(17,18)3/h13-19,22-23H,4-12H2,1-3H3/t13-,14+,15+,16-,17+,18-,19-,20-,21+/m0/s1
	8	2-Furanglycolic acid, 2TMS derivative	55517-39-0	C12H22O4Si2	286.106	371.745	OC(C(O)=O)c1occc1	InChI=1/C6H6O4/c7-5(6(8)9)4-2-1-3-10-4/h1-3,5,7H,(H,8,9)/f/h8H
	9	4-tert-Octylphenol, TMS derivative	78721-87-6	C17H30OSi	278.207	415.877	CC(C)(C)CC(C)(C)c1ccc(O)cc1	InChI=1/C14H22O/c1-13(2,3)10-14(4,5)11-6-8-12(15)9-7-11/h6-9,15H,10H2,1-5H3
	10	Cystathionine, 2TMS derivative	73090-79-6	C13H30N2O4SSi2	366.146	512.101	N[C@@H](CCSC[C@H](N)C(O)=O)C(O)=O	InChI=1/C7H14N2O4S/c8-4(6(10)11)1-2-14-3-5(9)7(12)13/h4-5H,1-3,8-9H2,(H,10,11)(H,12,13)/t4-,5-/m0/s1/f/h10,12H
	11	2,2-Bis(2-hydroxyphenyl)-propane, 2TMS derivative	155726-84-4	C21H32O2Si2	372.194	1421.44	CC(C)(c1ccccc1O)c2ccccc2O	InChI=1/C15H16O2/c1-15(2,11-7-3-5-9-13(11)16)12-8-4-6-10-14(12)17/h3-10,16-17H,1-2H3
	12	N-.alpha.-Acetyl-L-Lysine, 3TMS derivative	1000333-70-9	C17H40N2O3Si3	404.235	1161.81	CC(=O)NC(CCCCN)C(O)=O	InChI=1/C8H16N2O3/c1-6(11)10-7(8(12)13)4-2-3-5-9/h7H,2-5,9H2,1H3,(H,10,11)(H,12,13)/f/h10,12H
	13	2-Butenedioic acid, (E)-, 2TMS derivative	17962-03-7	C10H20O4Si2	260.09	715.34	OC(=O)/C=C/C(O)=O	InChI=1/C4H4O4/c5-3(6)1-2-4(7)8/h1-2H,(H,5,6)(H,7,8)/b2-1+/f/h5,7H
	14	Hexadecane-1,2-diol, 2TMS derivative	1000336-51-7	C22H50O2Si2	402.335	833.324	CCCCCCCCCCCCCCC(O)CO	InChI=1/C16H34O2/c1-2-3-4-5-6-7-8-9-10-11-12-13-14-16(18)15-17/h16-18H,2-15H2,1H3
	15	Anthranilic acid, 2TMS derivative	18406-07-0	C13H23NO2Si2	281.127	1096.64	Nc1ccccc1C(O)=O	InChI=1/C7H7NO2/c8-6-4-2-1-3-5(6)7(9)10/h1-4H,8H2,(H,9,10)/f/h9H
	16	2-Butyne-1,4-diol, 2TMS derivative	53326-60-6	C10H22O2Si2	230.116	378.491	OCC#CCO	InChI=1/C4H6O2/c5-3-1-2-4-6/h5-6H,3-4H2
	17	Glycolic acid, 2TMS derivative	33581-77-0	C8H20O3Si2	220.095	431.486	OCC(O)=O	InChI=1/C2H4O3/c3-1-2(4)5/h3H,1H2,(H,4,5)/f/h4H
	18	L-Methionine, 2TMS derivative	27844-10-6	C11H27NO2SSi2	293.13	883.933	CSCC[C@H](N)C(O)=O	InChI=1/C5H11NO2S/c1-9-3-2-4(6)5(7)8/h4H,2-3,6H2,1H3,(H,7,8)/t4-/m0/s1/f/h7H
	19	Thiodiglycol, 2TMS derivative	20486-03-7	C10H26O2SSi2	266.119	785.988	OCCSCCO	InChI=1/C4H10O2S/c5-1-3-7-4-2-6/h5-6H,1-4H2
	20	1-Hexadecanol, TBDMS derivative	76358-80-0	C22H48OSi	356.347	1300.02	CCCCCCCCCCCCCCCCO	InChI=1/C16H34O/c1-2-3-4-5-6-7-8-9-10-11-12-13-14-15-16-17/h17H,2-16H2,1H3
	21	4-Pyridinol, TMS derivative	1000352-50-3	C8H13NOSi	167.077	387.296	Oc1ccncc1	InChI=1/C5H5NO/c7-5-1-3-6-4-2-5/h1-4H,(H,6,7)/f/h7H
	22	1,5-Anhydrohexitol, 4TMS derivative	1000380-13-8	C18H44O5Si4	452.227	1171.16	OCC1OCC(O)C(O)C1O	InChI=1/C6H12O5/c7-1-4-6(10)5(9)3(8)2-11-4/h3-10H,1-2H2
	23	Butanedioic acid, 2TMS derivative	40309-57-7	C10H22O4Si2	262.106	683.002	OC(=O)CCC(O)=O	InChI=1/C4H6O4/c5-3(6)1-2-4(7)8/h1-2H2,(H,5,6)(H,7,8)/f/h5,7H
	24	Pantothenic acid tritms	1000331-78-2	C18H41NO5Si3	435.229	1271.81
	25	O-Mustard diglycol, 2TMS derivative	1000273-22-9	C14H34O3S2Si2	370.149	422.362
	26	Phenol, TMS derivative	1529-17-5	C9H14OSi	166.081	405.737	Oc1ccccc1	InChI=1/C6H6O/c7-6-4-2-1-3-5-6/h1-5,7H
	27	2-Amino-2-methyl-1,3-propanediol, 2TBDMS derivative	1000366-66-1	C16H39NO2Si2	333.252	956.971	CC(N)(CO)CO	InChI=1/C4H11NO2/c1-4(5,2-6)3-7/h6-7H,2-3,5H2,1H3
	28	Levobunolol methylboronate	127202-08-8	C18H26BNO3	315.201	699.777	CB1OC(COc2cccc3C(=O)CCCc23)CN1C(C)(C)C	InChI=1/C18H26BNO3/c1-18(2,3)20-11-13(23-19(20)4)12-22-17-10-6-7-14-15(17)8-5-9-16(14)21/h6-7,10,13H,5,8-9,11-12H2,1-4H3
	29	Bisphenol A, 2TMS derivative	4387-16-0	C21H32O2Si2	372.194	1420.4	CC(C)(c1ccc(O)cc1)c2ccc(O)cc2	InChI=1/C15H16O2/c1-15(2,11-3-7-13(16)8-4-11)12-5-9-14(17)10-6-12/h3-10,16-17H,1-2H3
	30	2-Phenylindolizine	25379-20-8	C14H11N	193.089	661.501	c1ccc(cc1)c2cn3ccccc3c2	InChI=1/C14H11N/c1-2-6-12(7-3-1)13-10-14-8-4-5-9-15(14)11-13/h1-11H
	31	Inosine, 4TMS derivative	1000332-74-7	C22H44N4O5Si4	556.239	1646.72	OC[C@H]1O[C@H]([C@H](O)[C@@H]1O)n2cnc3c(O)ncnc23	InChI=1/C10H12N4O5/c15-1-4-6(16)7(17)10(19-4)14-3-13-5-8(14)11-2-12-9(5)18/h2-4,6-7,10,15-17H,1H2,(H,11,12,18)/t4-,6-,7-,10-/m1/s1/f/h18H
	32	Cyclohexanol, TMS derivative	13871-89-1	C9H20OSi	172.128	356.975	OC1CCCCC1	InChI=1/C6H12O/c7-6-4-2-1-3-5-6/h6-7H,1-5H2
	33	1,4-Bis(trimethylsilyl)-1,3-butadiyne	4526-07-02	C10H18Si2	194.095	1187.15	C[Si](C)(C)C#CC#C[Si](C)(C)C	InChI=1/C10H18Si2/c1-11(2,3)9-7-8-10-12(4,5)6/h1-6H3
	34	Butylphosphonic acid, heptyl 4-(2-phenylprop-2-yl)phenyl ester	1000323-09-7	C26H39O3P	430.264	1266.95	CCCCCCCO[P](=O)(CCCC)Oc1ccc(cc1)C(C)(C)c2ccccc2	InChI=1/C26H39O3P/c1-5-7-9-10-14-21-28-30(27,22-8-6-2)29-25-19-17-24(18-20-25)26(3,4)23-15-12-11-13-16-23/h11-13,15-20H,5-10,14,21-22H2,1-4H3
	35	Dehydroabietic acid, TMS derivative	21414-49-3	C23H36O2Si	372.248	1529.61	CC(C)c1ccc2c(CC[C@H]3[C@@](C)(CCC[C@]23C)C(O)=O)c1	InChI=1/C20H28O2/c1-13(2)14-6-8-16-15(12-14)7-9-17-19(16,3)10-5-11-20(17,4)18(21)22/h6,8,12-13,17H,5,7,9-11H2,1-4H3,(H,21,22)/t17-,19-,20-/m1/s1/f/h21H
	36	D-Pinitol, pentakis(trimethylsilyl) ether	1000380-13-4	C22H54O6Si5	554.277	1185.01
	37	Isophthalic acid, heptyl tridec-2-ynyl ester	1000343-91-9	C28H42O4	442.308	974.578	CCCCCCCCCCC#CCOC(=O)c1cccc(c1)C(=O)OCCCCCCC	InChI=1/C28H42O4/c1-3-5-7-9-10-11-12-13-14-16-18-23-32-28(30)26-21-19-20-25(24-26)27(29)31-22-17-15-8-6-4-2/h19-21,24H,3-15,17,22-23H2,1-2H3
	38	Dodecane, 4-methyl-	6117-97-1	C13H28	184.219	583.228	CCCCCCCCC(C)CCC	InChI=1/C13H28/c1-4-6-7-8-9-10-12-13(3)11-5-2/h13H,4-12H2,1-3H3
	39	[1,2,5]Oxadiazolo[3,4-b]pyrazine-5,6-diamine	1000300-94-6	C4H4N6O	152.045	387.318	Nc1nc2nonc2nc1N	InChI=1/C4H4N6O/c5-1-2(6)8-4-3(7-1)9-11-10-4/h(H2,5,7,9)(H2,6,8,10)/f/h5-6H2
	40	Dodecane, 1-iodo-	4292-19-7	C12H25I	296.1	521.686	CCCCCCCCCCCCI	InChI=1/C12H25I/c1-2-3-4-5-6-7-8-9-10-11-12-13/h2-12H2,1H3
	41	Octane, 2-methyl-	3221-61-2	C9H20	128.157	362.468	CCCCCCC(C)C	InChI=1/C9H20/c1-4-5-6-7-8-9(2)3/h9H,4-8H2,1-3H3
	42	4H-Thieno[3,4-c]benzopyran-4-one, 3-amino-	41078-15-3	C11H7NO2S	217.02	1213.55	Nc1scc2c3ccccc3OC(=O)c12	InChI=1/C11H7NO2S/c12-10-9-7(5-15-10)6-3-1-2-4-8(6)14-11(9)13/h1-5H,12H2
	43	Sulazepam	2898-13-7	C16H13ClN2S	300.049	660.557	CN1C(=S)CN=C(c2ccccc2)c3cc(Cl)ccc13	InChI=1/C16H13ClN2S/c1-19-14-8-7-12(17)9-13(14)16(18-10-15(19)20)11-5-3-2-4-6-11/h2-9H,10H2,1H3
	44	Hexadecane	544-76-3	C16H34	226.266	822.292	CCCCCCCCCCCCCCCC	InChI=1/C16H34/c1-3-5-7-9-11-13-15-16-14-12-10-8-6-4-2/h3-16H2,1-2H3
	45	Disiloxane, hexamethyl-	107-46-0	C6H18OSi2	162.09	490.364	C[Si](C)(C)O[Si](C)(C)C	InChI=1/C6H18OSi2/c1-8(2,3)7-9(4,5)6/h1-6H3
	46	Succinic acid, 2,2,3,3,4,4,5,5-octafluoropentyl 2-methylpent-3-yl ester	1000389-59-5	C15H20F8O4	416.123	648.327	CCC(OC(=O)CCC(=O)OCC(F)(F)C(F)(F)C(F)(F)C(F)F)C(C)C	InChI=1/C15H20F8O4/c1-4-9(8(2)3)27-11(25)6-5-10(24)26-7-13(18,19)15(22,23)14(20,21)12(16)17/h8-9,12H,4-7H2,1-3H3
	47	Isothiazole, 4-methyl-	693-90-3	C4H5NS	99.014	606.412	Cc1csnc1	InChI=1/C4H5NS/c1-4-2-5-6-3-4/h2-3H,1H3
	48	Decane, 2,4-dimethyl-	2801-84-5	C12H26	170.203	565.33	CCCCCCC(C)CC(C)C	InChI=1/C12H26/c1-5-6-7-8-9-12(4)10-11(2)3/h11-12H,5-10H2,1-4H3
	49	Hexadecane, 1-iodo-	544-77-4	C16H33I	352.163	1208.06	CCCCCCCCCCCCCCCCI	InChI=1/C16H33I/c1-2-3-4-5-6-7-8-9-10-11-12-13-14-15-16-17/h2-16H2,1H3
	50	Bisphenol A monomethyl ether, TMS derivative	1000283-55-5	C19H26O2Si	314.17	715.33	COC.CC(C)(c1ccc(O)cc1)c2ccc(O)cc2	InChI=1/C15H16O2.C2H6O/c1-15(2,11-3-7-13(16)8-4-11)12-5-9-14(17)10-6-12;1-3-2/h3-10,16-17H,1-2H3;1-2H3
	51	Hexadecanoic acid, ethyl ester	628-97-7	C18H36O2	284.272	1258.24	CCCCCCCCCCCCCCCC(=O)OCC	InChI=1/C18H36O2/c1-3-5-6-7-8-9-10-11-12-13-14-15-16-17-18(19)20-4-2/h3-17H2,1-2H3
	52	L-Lysine, 4TMS derivative	55429-07-7	C18H46N2O2Si4	434.264	1217.49	NCCCC[C@H](N)C(O)=O	InChI=1/C6H14N2O2/c7-4-2-1-3-5(8)6(9)10/h5H,1-4,7-8H2,(H,9,10)/t5-/m0/s1/f/h9H
	53	1-Octadecanol, TMS derivative	18748-98-6	C21H46OSi	342.332	1371.42	CCCCCCCCCCCCCCCCCCO	InChI=1/C18H38O/c1-2-3-4-5-6-7-8-9-10-11-12-13-14-15-16-17-18-19/h19H,2-18H2,1H3
	54	Eicosapentaenoic Acid, TBDMS derivative	1000333-53-1	C26H44O2Si	416.311	1623.37	CCCCCCCCCC=CC=CC=CC=CC=CC(O)=O	InChI=1/C20H30O2/c1-2-3-4-5-6-7-8-9-10-11-12-13-14-15-16-17-18-19-20(21)22/h10-19H,2-9H2,1H3,(H,21,22)/f/h21H
	55	Tris(trimethylsilyl)carbamate	1000366-58-2	C10H27NO2Si3	277.135	388.251
	56	3-Trifluoromethylbenzylamine, N,N-didecyl	1000310-29-8	C28H48F3N	455.374	1364.53	CCCCCCCCCCN(CCCCCCCCCC)Cc1cccc(c1)C(F)(F)F	InChI=1/C28H48F3N/c1-3-5-7-9-11-13-15-17-22-32(23-18-16-14-12-10-8-6-4-2)25-26-20-19-21-27(24-26)28(29,30)31/h19-21,24H,3-18,22-23,25H2,1-2H3
	57	1-(p-Methoxyphenyl)-2-phenylbenzimidazole	94542-54-8	C20H16N2O	300.126	751.736	COc1ccc(cc1)n2c3ccccc3nc2c4ccccc4	InChI=1/C20H16N2O/c1-23-17-13-11-16(12-14-17)22-19-10-6-5-9-18(19)21-20(22)15-7-3-2-4-8-15/h2-14H,1H3
	58	Ethyl Oleate	111-62-6	C20H38O2	310.287	1379.41	CCCCCCCC\C=C/CCCCCCCC(=O)OCC	InChI=1/C20H38O2/c1-3-5-6-7-8-9-10-11-12-13-14-15-16-17-18-19-20(21)22-4-2/h11-12H,3-10,13-19H2,1-2H3/b12-11-
	59	Trisiloxane, octamethyl-	107-51-7	C8H24O2Si3	236.108	697.351	C[Si](C)(C)O[Si](C)(C)O[Si](C)(C)C	InChI=1/C8H24O2Si3/c1-11(2,3)9-13(7,8)10-12(4,5)6/h1-8H3
	60	2-Methyl-1,4-bis(trimethylsiloxy)butane	105747-05-5	C11H28O2Si2	248.163	556.15	CC(CCO[Si](C)(C)C)CO[Si](C)(C)C	InChI=1/C11H28O2Si2/c1-11(10-13-15(5,6)7)8-9-12-14(2,3)4/h11H,8-10H2,1-7H3
	61	Glycerol monostearate, 2TMS derivative	1188-75-6	C27H58O4Si2	502.387	1748.01	CCCCCCCCCCCCCCCCCC(O)=O.OCC(O)CO	InChI=1/C18H36O2.C3H8O3/c1-2-3-4-5-6-7-8-9-10-11-12-13-14-15-16-17-18(19)20;4-1-3(6)2-5/h2-17H2,1H3,(H,19,20);3-6H,1-2H2/f/h19H;
	62	Phosphoric acid, bis(trimethylsilyl)monomethyl ester	18291-81-1	C7H21O4PSi2	256.072	544.958	CO[P](=O)(O[Si](C)(C)C)O[Si](C)(C)C	InChI=1/C7H21O4PSi2/c1-9-12(8,10-13(2,3)4)11-14(5,6)7/h1-7H3
	63	Phosmet	732-11-6	C11H12NO4PS2	316.995	673.933	CO[P](=S)(OC)SCN1C(=O)c2ccccc2C1=O	InChI=1/C11H12NO4PS2/c1-15-17(18,16-2)19-7-12-10(13)8-5-3-4-6-9(8)11(12)14/h3-6H,7H2,1-2H3
	64	Oxalic acid, 2TMS derivative	18294-04-7	C8H18O4Si2	234.074	503.099	OC(=O)C(O)=O	InChI=1/C2H2O4/c3-1(4)2(5)6/h(H,3,4)(H,5,6)/f/h3,5H
	65	L-Tyrosine, 3TMS derivative	51220-73-6	C18H35NO3Si3	397.192	1230.67	N[C@@H](Cc1ccc(O)cc1)C(O)=O	InChI=1/C9H11NO3/c10-8(9(12)13)5-6-1-3-7(11)4-2-6/h1-4,8,11H,5,10H2,(H,12,13)/t8-/m0/s1/f/h12H
	66	Eicosane	112-95-8	C20H42	282.329	1040.83	CCCCCCCCCCCCCCCCCCCC	InChI=1/C20H42/c1-3-5-7-9-11-13-15-17-19-20-18-16-14-12-10-8-6-4-2/h3-20H2,1-2H3
	67	Tetrahydrofuran	109-99-9	C4H8O	72.058	839.089	C1CCOC1	InChI=1/C4H8O/c1-2-4-5-3-1/h1-4H2
	68	.alpha.-Tocopherol, TMS derivative	2733-26-8	C32H58O2Si	502.421	1938.72	CC(C)CCCC(C)CCCC(C)CCCC1(C)CCc2c(C)c(O)c(C)c(C)c2O1	InChI=1/C29H50O2/c1-20(2)12-9-13-21(3)14-10-15-22(4)16-11-18-29(8)19-17-26-25(7)27(30)23(5)24(6)28(26)31-29/h20-22,30H,9-19H2,1-8H3
	69	Uracil, 2TMS derivative	10457-14-4	C10H20N2O2Si2	256.106	710.985	O=C1NC=CC(=O)N1	InChI=1/C4H4N2O2/c7-3-1-2-5-4(8)6-3/h1-2H,(H2,5,6,7,8)/f/h5-6H
	70	9,10-anthracenedione, 1-amino-4-[(4-methylphenyl)amino]-	1000402-38-7	C21H16N2O2	328.121	1362.49	Cc1ccc(Nc2ccc(N)c3C(=O)c4ccccc4C(=O)c23)cc1	InChI=1/C21H16N2O2/c1-12-6-8-13(9-7-12)23-17-11-10-16(22)18-19(17)21(25)15-5-3-2-4-14(15)20(18)24/h2-11,23H,22H2,1H3
	71	9H-Purin-6-ol, 2TMS derivative	17962-89-9	C11H20N4OSi2	280.118	1127.86	Oc1ncnc2[nH]cnc12	InChI=1/C5H4N4O/c10-5-3-4(7-1-6-3)8-2-9-5/h1-2H,(H2,6,7,8,9,10)/f/h7,10H
	72	Eicosane, 1-iodo-	1000406-31-8	C20H41I	408.225	854.168	CCCCCCCCCCCCCCCCCCCCI	InChI=1/C20H41I/c1-2-3-4-5-6-7-8-9-10-11-12-13-14-15-16-17-18-19-20-21/h2-20H2,1H3
	73	Octane, 5-ethyl-2-methyl-	62016-18-6	C11H24	156.188	643.911	CCCC(CC)CCC(C)C	InChI=1/C11H24/c1-5-7-11(6-2)9-8-10(3)4/h10-11H,5-9H2,1-4H3
	74	Nonane, 5-methyl-5-propyl-	17312-75-3	C13H28	184.219	414.32	CCCCC(C)(CCC)CCCC	InChI=1/C13H28/c1-5-8-11-13(4,10-7-3)12-9-6-2/h5-12H2,1-4H3
	75	Squalene	111-02-4	C30H50	410.391	1768.38	CC(C)=CCC\C(C)=C\CC\C(C)=C\CC\C=C(/C)CC\C=C(/C)CCC=C(C)C	InChI=1/C30H50/c1-25(2)15-11-19-29(7)23-13-21-27(5)17-9-10-18-28(6)22-14-24-30(8)20-12-16-26(3)4/h15-18,23-24H,9-14,19-22H2,1-8H3/b27-17+,28-18+,29-23+,30-24+
	76	Linoleic acid ethyl ester	544-35-4	C20H36O2	308.272	1376.28	CCCCC/C=C\C\C=C/CCCCCCCC(=O)OCC	InChI=1/C20H36O2/c1-3-5-6-7-8-9-10-11-12-13-14-15-16-17-18-19-20(21)22-4-2/h8-9,11-12H,3-7,10,13-19H2,1-2H3/b9-8-,12-11-
	77	Dodecane, 4,6-dimethyl-	61141-72-8	C14H30	198.235	690.558	CCCCCCC(C)CC(C)CCC	InChI=1/C14H30/c1-5-7-8-9-11-14(4)12-13(3)10-6-2/h13-14H,5-12H2,1-4H3
	78	4-Hydroxybutanoic acid, 2TMS derivative	55133-95-4	C10H24O3Si2	248.126	602.512	OCCCC(O)=O	InChI=1/C4H8O3/c5-3-1-2-4(6)7/h5H,1-3H2,(H,6,7)/f/h6H
	79	Tetrasiloxane, decamethyl-	141-62-8	C10H30O3Si4	310.127	396.056	C[Si](C)(C)O[Si](C)(C)O[Si](C)(C)O[Si](C)(C)C	InChI=1/C10H30O3Si4/c1-14(2,3)11-16(7,8)13-17(9,10)12-15(4,5)6/h1-10H3
	80	1-Monopalmitin, 2TMS derivative	1188-74-5	C25H54O4Si2	474.356	1642.63	CCCCCCCCCCCCCCCC(=O)OCC(O)CO	InChI=1/C19H38O4/c1-2-3-4-5-6-7-8-9-10-11-12-13-14-15-19(22)23-17-18(21)16-20/h18,20-21H,2-17H2,1H3
	81	D-Lactose, octakis(trimethylsilyl) ether, methyloxime (isomer 2)	1000380-10-4	C37H89NO11Si8	947.459	1728.15
	82	Niacinamide, TBDMS derivative	1000374-74-4	C12H20N2OSi	236.134	851.225	NC(=O)c1cccnc1	InChI=1/C6H6N2O/c7-6(9)5-2-1-3-8-4-5/h1-4H,(H2,7,9)/f/h7H2
	83	L-Phenylalanine, 2TMS derivative	7364-51-4	C15H27NO2Si2	309.158	980.061	N[C@@H](Cc1ccccc1)C(O)=O	InChI=1/C9H11NO2/c10-8(9(11)12)6-7-4-2-1-3-5-7/h1-5,8H,6,10H2,(H,11,12)/t8-/m0/s1/f/h11H
	84	L-Leucine, 2TMS derivative	7364-46-7	C12H29NO2Si2	275.174	643.665	CC(C)C[C@H](N)C(O)=O	InChI=1/C6H13NO2/c1-4(2)3-5(7)6(8)9/h4-5H,3,7H2,1-2H3,(H,8,9)/t5-/m0/s1/f/h8H
	85	D-Arabinose, tetrakis(trimethylsilyl) ether, ethyloxime (isomer 2)	1000394-64-9	C19H47NO5Si4	481.253	1035.35
	86	13-Octadecenoic acid, (Z)-, TMS derivative	1000333-58-8	C21H42O2Si	354.295	1416.85	CCCC\C=C/CCCCCCCCCCCC(O)=O	InChI=1/C18H34O2/c1-2-3-4-5-6-7-8-9-10-11-12-13-14-15-16-17-18(19)20/h5-6H,2-4,7-17H2,1H3,(H,19,20)/b6-5-/f/h19H
	87	Undecane, 3,8-dimethyl-	17301-30-3	C13H28	184.219	455.819	CCCC(C)CCCCC(C)CC	InChI=1/C13H28/c1-5-9-13(4)11-8-7-10-12(3)6-2/h12-13H,5-11H2,1-4H3
	88	Malic acid, 3TMS derivative	38166-11-9	C13H30O5Si3	350.14	859.279	OC(CC(O)=O)C(O)=O	InChI=1/C4H6O5/c5-2(4(8)9)1-3(6)7/h2,5H,1H2,(H,6,7)(H,8,9)/f/h6,8H
	89	Silanol, trimethyl-, phosphate (3:1)	10497-05-9	C9H27O4PSi3	314.095	656.936	C[Si](C)(C)O.C[Si](C)(C)O.C[Si](C)(C)O.O[P](O)(O)=O	InChI=1/3C3H10OSi.H3O4P/c4*1-5(2,3)4/h3*4H,1-3H3;(H3,1,2,3,4)/f/h;;;1-3H
	90	2-Aminobenzoxazole, 2TMS derivative	1000332-41-8	C13H22N2OSi2	278.127	904.38	Nc1oc2ccccc2n1	InChI=1/C7H6N2O/c8-7-9-5-3-1-2-4-6(5)10-7/h1-4H,(H2,8,9)/f/h8H2
	91	Dodecane	112-40-3	C12H26	170.203	559.96	CCCCCCCCCCCC	InChI=1/C12H26/c1-3-5-7-9-11-12-10-8-6-4-2/h3-12H2,1-2H3
	92	D-(+)-Talose, pentakis(trimethylsilyl) ether, methyloxime (syn)	1000380-18-7	C22H55NO6Si5	569.288	1212.38
	93	Pentasiloxane, dodecamethyl-	141-63-9	C12H36O4Si5	384.146	542.212	C[Si](C)(C)O[Si](C)(C)O[Si](C)(C)O[Si](C)(C)O[Si](C)(C)C	InChI=1/C12H36O4Si5/c1-17(2,3)13-19(7,8)15-21(11,12)16-20(9,10)14-18(4,5)6/h1-12H3
	94	Conanine, (5.alpha.)-	468-33-7	C22H37N	315.293	652.78	CC1C2CCC3C4CCC5CCCCC5(C)C4CCC23CN1C	InChI=1/C22H37N/c1-15-18-9-10-20-17-8-7-16-6-4-5-12-21(16,2)19(17)11-13-22(18,20)14-23(15)3/h15-20H,4-14H2,1-3H3
	95	L-Isoleucine, 2TMS derivative	7483-92-3	C12H29NO2Si2	275.174	666.212	CC[C@H](C)[C@H](N)C(O)=O	InChI=1/C6H13NO2/c1-3-4(2)5(7)6(8)9/h4-5H,3,7H2,1-2H3,(H,8,9)/t4-,5-/m0/s1/f/h8H
	96	L-Proline, 2TMS derivative	7364-47-8	C11H25NO2Si2	259.142	668.179	OC(=O)[C@@H]1CCCN1	InChI=1/C5H9NO2/c7-5(8)4-2-1-3-6-4/h4,6H,1-3H2,(H,7,8)/t4-/m0/s1/f/h7H
	97	Decane, 4-methyl-	2847-72-5	C11H24	156.188	371.003	CCCCCCC(C)CCC	InChI=1/C11H24/c1-4-6-7-8-10-11(3)9-5-2/h11H,4-10H2,1-3H3
	98	Pyrido[2,3-d]pyrimidin-5(8H)-one, 2-methyl-4-phenyl-	161466-00-8	C14H11N3O	237.09	503.585	Cc1nc2NC=CC(=O)c2c(n1)c3ccccc3	InChI=1/C14H11N3O/c1-9-16-13(10-5-3-2-4-6-10)12-11(18)7-8-15-14(12)17-9/h2-8H,1H3,(H,15,16,17,18)/f/h15H
	99	1-Cyano-4-diphenyl(tert-butyl)silyloxybenzene	1000307-86-7	C23H23NOSi	357.155	659.438	CC(C)(C)[Si](Oc1ccc(cc1)C#N)(c2ccccc2)c3ccccc3	InChI=1/C23H23NOSi/c1-23(2,3)26(21-10-6-4-7-11-21,22-12-8-5-9-13-22)25-20-16-14-19(18-24)15-17-20/h4-17H,1-3H3
	100	Phosphoric acid, bis(trimethylsilyl) 2,3-bis[(trimethylsilyl)oxy]propyl ester	31038-11-6	C15H41O6PSi4	460.172	1101.17	C[Si](C)(C)OCC(CO[P](=O)(O[Si](C)(C)C)O[Si](C)(C)C)O[Si](C)(C)C	InChI=1/C15H41O6PSi4/c1-23(2,3)18-14-15(19-24(4,5)6)13-17-22(16,20-25(7,8)9)21-26(10,11)12/h15H,13-14H2,1-12H3
	101	L-Glutamic acid, 3TMS derivative	15985-07-6	C14H33NO4Si3	363.172	974.663	N[C@@H](CCC(O)=O)C(O)=O	InChI=1/C5H9NO4/c6-3(5(9)10)1-2-4(7)8/h3H,1-2,6H2,(H,7,8)(H,9,10)/t3-/m0/s1/f/h7,9H
	102	Myristic acid, TMS derivative	18603-17-3	C17H36O2Si	300.248	1151.67	CCCCCCCCCCCCCC(O)=O	InChI=1/C14H28O2/c1-2-3-4-5-6-7-8-9-10-11-12-13-14(15)16/h2-13H2,1H3,(H,15,16)/f/h15H
	103	D-Myo-Inositol, 1,2,4,5,6-pentakis-O-(trimethylsilyl)-, bis(trimethylsilyl) phosphate	55568-91-7	C27H69O9PSi7	764.306	1564.55	C[Si](C)(C)OC1C(O[Si](C)(C)C)C(O[Si](C)(C)C)C(O[P](=O)(O[Si](C)(C)C)O[Si](C)(C)C)C(O[Si](C)(C)C)C1O[Si](C)(C)C	InChI=1/C27H69O9PSi7/c1-38(2,3)30-23-22(29-37(28,35-43(16,17)18)36-44(19,20)21)24(31-39(4,5)6)26(33-41(10,11)12)27(34-42(13,14)15)25(23)32-40(7,8)9/h22-27H,1-21H3
	104	Silanamine, N,N'-methanetetraylbis[1,1,1-trimethyl-	1000-70-0	C7H18N2Si2	186.101	311.568	C[Si](C)(C)N=C=N[Si](C)(C)C	InChI=1/C7H18N2Si2/c1-10(2,3)8-7-9-11(4,5)6/h1-6H3
	105	3-Hydroxybutyric acid, 2TMS derivative	55133-94-3	C10H24O3Si2	248.126	523.586	CC(O)CC(O)=O	InChI=1/C4H8O3/c1-3(5)2-4(6)7/h3,5H,2H2,1H3,(H,6,7)/f/h6H
	106	Arachidonic acid, TMS derivative	113516-18-0	C23H40O2Si	376.28	1510.42	CCCCC/C=C\C\C=C/C/C=C\C\C=C/CCCC(O)=O	InChI=1/C20H32O2/c1-2-3-4-5-6-7-8-9-10-11-12-13-14-15-16-17-18-19-20(21)22/h6-7,9-10,12-13,15-16H,2-5,8,11,14,17-19H2,1H3,(H,21,22)/b7-6-,10-9-,13-12-,16-15-/f/h21H
	107	Cholesterol, TMS derivative	1856-05-9	C30H54OSi	458.394	1950.5	CC(C)CCC[C@@H](C)[C@H]1CC[C@H]2[C@@H]3CC=C4C[C@@H](O)CC[C@]4(C)[C@H]3CC[C@]12C	InChI=1/C27H46O/c1-18(2)7-6-8-19(3)23-11-12-24-22-10-9-20-17-21(28)13-15-26(20,4)25(22)14-16-27(23,24)5/h9,18-19,21-25,28H,6-8,10-17H2,1-5H3/t19-,21+,22+,23-,24+,25+,26+,27-/m1/s1
	108	Scyllo-Inositol, 6TMS derivative	14251-18-4	C24H60O6Si6	612.301	1306.81	OC1C(O)C(O)C(O)C(O)C1O	InChI=1/C6H12O6/c7-1-2(8)4(10)6(12)5(11)3(1)9/h1-12H
	109	L-Valine, 2TMS derivative	7364-44-5	C11H27NO2Si2	261.158	584.54	CC(C)[C@H](N)C(O)=O	InChI=1/C5H11NO2/c1-3(2)4(6)5(7)8/h3-4H,6H2,1-2H3,(H,7,8)/t4-/m0/s1/f/h7H
	110	Urea, 2TMS derivative	18297-63-7	C7H20N2OSi2	204.111	609.51	NC(N)=O	InChI=1/CH4N2O/c2-1(3)4/h(H4,2,3,4)/f/h2-3H2
	111	Aminomalonic acid, tris(trimethylsilyl)-	1000079-52-5	C12H29NO4Si3	335.14	841.655	C[Si](C)(C)OC(=O)C(N)(C(=O)O[Si](C)(C)C)[Si](C)(C)C	InChI=1/C12H29NO4Si3/c1-18(2,3)12(13,10(14)16-19(4,5)6)11(15)17-20(7,8)9/h13H2,1-9H3
	112	9-Hexadecenoic acid, (Z)-, TMS derivative	1000333-19-8	C19H38O2Si	326.264	1282.12	CCCCCC\C=C/CCCCCCCC(O)=O	InChI=1/C16H30O2/c1-2-3-4-5-6-7-8-9-10-11-12-13-14-15-16(17)18/h7-8H,2-6,9-15H2,1H3,(H,17,18)/b8-7-/f/h17H
	113	2,6-Dimethyldecane	13150-81-7	C12H26	170.203	408.287	CCCCC(C)CCCC(C)C	InChI=1/C12H26/c1-5-6-9-12(4)10-7-8-11(2)3/h11-12H,5-10H2,1-4H3
	114	Ethanolamine, 3TMS derivative	5630-81-9	C11H31NOSi3	277.171	637.44	NCCO	InChI=1/C2H7NO/c3-1-2-4/h4H,1-3H2
	115	Ethylene glycol, 2TMS derivative	7381-30-8	C8H22O2Si2	206.116	334.874	OCCO	InChI=1/C2H6O2/c3-1-2-4/h3-4H,1-2H2
	116	1-Methyl-N,N-bis(trimethylsilyl)-4-[(trimethylsilyl)oxy]-1H-imidazol-2-amine	1000333-94-6	C13H31N3OSi3	329.177	919.538	Cn1cc(O[Si](C)(C)C)nc1N([Si](C)(C)C)[Si](C)(C)C	InChI=1/C13H31N3OSi3/c1-15-11-12(17-20(8,9)10)14-13(15)16(18(2,3)4)19(5,6)7/h11H,1-10H3
	117	L-Threonine, 3TMS derivative	7537-02-02	C13H33NO3Si3	335.177	762.98	C[C@@H](O)[C@H](N)C(O)=O	InChI=1/C4H9NO3/c1-2(6)3(5)4(7)8/h2-3,6H,5H2,1H3,(H,7,8)/t2-,3+/m1/s1/f/h7H
	118	Phosphorylethanolamine, 4TMS derivative	55334-92-4	C14H40NO4PSi4	429.177	1114.89	NCCO[P](O)(O)=O	InChI=1/C2H8NO4P/c3-1-2-7-8(4,5)6/h1-3H2,(H2,4,5,6)/f/h4-5H
	119	Heptadecanoic acid, TMS derivative	55517-58-3	C20H42O2Si	342.295	1363.97	CCCCCCCCCCCCCCCCC(O)=O	InChI=1/C17H34O2/c1-2-3-4-5-6-7-8-9-10-11-12-13-14-15-16-17(18)19/h2-16H2,1H3,(H,18,19)/f/h18H
	120	Serine, 3TMS derivative	64625-17-8	C12H31NO3Si3	321.161	736.251	N[C@@H](CO)C(O)=O	InChI=1/C3H7NO3/c4-2(1-5)3(6)7/h2,5H,1,4H2,(H,6,7)/t2-/m0/s1/f/h6H
	121	Stearic acid, TMS derivative	18748-91-9	C21H44O2Si	356.311	1429.31	CCCCCCCCCCCCCCCCCC(O)=O	InChI=1/C18H36O2/c1-2-3-4-5-6-7-8-9-10-11-12-13-14-15-16-17-18(19)20/h2-17H2,1H3,(H,19,20)/f/h19H
	122	L-5-Oxoproline, , 2TMS derivative	30274-77-2	C11H23NO3Si2	273.122	886.976
	123	Glycine, 3TMS derivative	5630-82-0	C11H29NO2Si3	291.151	678.819	NCC(O)=O	InChI=1/C2H5NO2/c3-1-2(4)5/h1,3H2,(H,4,5)/f/h4H
	124	Decane	124-18-5	C10H22	142.172	347.363	CCCCCCCCCC	InChI=1/C10H22/c1-3-5-7-9-10-8-6-4-2/h3-10H2,1-2H3
	125	Linoelaidic acid, trimethylsilyl ester	1000395-58-1	C21H40O2Si	352.28	1409.55
	126	Myo-Inositol, 6TMS derivative	2582-79-8	C24H60O6Si6	612.301	1349.59	OC1C(O)C(O)C(O)C(O)C1O	InChI=1/C6H12O6/c7-1-2(8)4(10)6(12)5(11)3(1)9/h1-12H
	127	Benzene, 1,3-bis(1,1-dimethylethyl)-	1014-60-4	C14H22	190.172	620.643	CC(C)(C)c1cccc(c1)C(C)(C)C	InChI=1/C14H22/c1-13(2,3)11-8-7-9-12(10-11)14(4,5)6/h7-10H,1-6H3
	128	9-Octadecenoic acid, (E)-, TMS derivative	96851-47-7	C21H42O2Si	354.295	1412.69	CCCCCCCC/C=C/CCCCCCCC(O)=O	InChI=1/C18H34O2/c1-2-3-4-5-6-7-8-9-10-11-12-13-14-15-16-17-18(19)20/h9-10H,2-8,11-17H2,1H3,(H,19,20)/b10-9+/f/h19H
	129	Glycerol, 3TMS derivative	6787-10-06	C12H32O3Si3	308.166	648.784	OCC(O)CO	InChI=1/C3H8O3/c4-1-3(6)2-5/h3-6H,1-2H2
	130	L-Alanine, 2TMS derivative	27844-07-1	C9H23NO2Si2	233.127	461.671	C[C@H](N)C(O)=O	InChI=1/C3H7NO2/c1-2(4)3(5)6/h2H,4H2,1H3,(H,5,6)/t2-/m0/s1/f/h5H
	131	Palmitic Acid, TMS derivative	55520-89-3	C19H40O2Si	328.28	1296.36	CCCCCCCCCCCCCCCC(O)=O	InChI=1/C16H32O2/c1-2-3-4-5-6-7-8-9-10-11-12-13-14-15-16(17)18/h2-15H2,1H3,(H,17,18)/f/h17H
	132	Lactic Acid, 2TMS derivative	17596-96-2	C9H22O3Si2	234.111	416.493	CC(O)C(O)=O	InChI=1/C3H6O3/c1-2(4)3(5)6/h2,4H,1H3,(H,5,6)/f/h5H
WAT	1	.alpha.-Tocopherol, TMS derivative	52760-33-5	C32H58O2Si	502.421	1939.88	CC(C)CCCC(C)CCCC(C)CCCC1(C)CCc2c(C)c(O)c(C)c(C)c2O1	InChI=1/C29H50O2/c1-20(2)12-9-13-21(3)14-10-15-22(4)16-11-18-29(8)19-17-26-25(7)27(30)23(5)24(6)28(26)31-29/h20-22,30H,9-19H2,1-8H3
	2	1,2,3-Propatriol, 1-indol-4-yl(ether)	61212-32-6	C11H13NO3	207.09	1962.65	OCC(O)COc1cccc2[nH]ccc12	InChI=1/C11H13NO3/c13-6-8(14)7-15-11-3-1-2-10-9(11)4-5-12-10/h1-5,8,12-14H,6-7H2
	3	1,3-Diphenyl-2-azafluorene	57162-74-0	C24H17N	319.136	1204.15	C1c2ccccc2c3cc(nc(c4ccccc4)c13)c5ccccc5	InChI=1/C24H17N/c1-3-9-17(10-4-1)23-16-21-20-14-8-7-13-19(20)15-22(21)24(25-23)18-11-5-2-6-12-18/h1-14,16H,15H2
	4	1,3-Propanediol, 2TMS derivative	17887-80-8	C9H24O2Si2	220.131	556.689	OCCCO	InChI=1/C3H8O2/c4-2-1-3-5/h4-5H,1-3H2
	5	1,4-Butanediol, 2TMS derivative	18001-91-7	C10H26O2Si2	234.147	784.943	OCCCCO	InChI=1/C4H10O2/c5-3-1-2-4-6/h5-6H,1-4H2
	6	13-Octadecenoic acid, (E)-, TMS derivative	1000333-61-7	C21H42O2Si	354.295	1417.03	CCCC/C=C/CCCCCCCCCCCC(O)=O	InChI=1/C18H34O2/c1-2-3-4-5-6-7-8-9-10-11-12-13-14-15-16-17-18(19)20/h5-6H,2-4,7-17H2,1H3,(H,19,20)/b6-5+/f/h19H
	7	1-Dimethyl(octyl)silyloxyhexadecane	1000280-39-6	C26H56OSi	412.41	686.715	CCCCCCCCCCCCCCCCO[Si](C)(C)CCCCCCCC	InChI=1/C26H56OSi/c1-5-7-9-11-13-14-15-16-17-18-19-20-21-23-25-27-28(3,4)26-24-22-12-10-8-6-2/h5-26H2,1-4H3
	8	1-Hexadecanol, TBDMS derivative	76358-80-0	C22H48OSi	356.347	748.988	CCCCCCCCCCCCCCCCO	InChI=1/C16H34O/c1-2-3-4-5-6-7-8-9-10-11-12-13-14-15-16-17/h17H,2-16H2,1H3
	9	1H-Indole-2,3-dione, 5-methyl-	608-05-9	C9H7NO2	161.048	644.122	Cc1ccc2NC(=O)C(=O)c2c1	InChI=1/C9H7NO2/c1-5-2-3-7-6(4-5)8(11)9(12)10-7/h2-4H,1H3,(H,10,11,12)/f/h10H
	10	1-Methyl-N,N-bis(trimethylsilyl)-4-[(trimethylsilyl)oxy]-1H-imidazol-2-amine	1000333-94-6	C13H31N3OSi3	329.177	919.895	Cn1cc(O[Si](C)(C)C)nc1N([Si](C)(C)C)[Si](C)(C)C	InChI=1/C13H31N3OSi3/c1-15-11-12(17-20(8,9)10)14-13(15)16(18(2,3)4)19(5,6)7/h11H,1-10H3
	11	1-Monopalmitin, 2TMS derivative	1188-74-5	C25H54O4Si2	474.356	1644.23	CCCCCCCCCCCCCCCC(=O)OCC(O)CO	InChI=1/C19H38O4/c1-2-3-4-5-6-7-8-9-10-11-12-13-14-15-19(22)23-17-18(21)16-20/h18,20-21H,2-17H2,1H3
	12	1-Octadecanol, TMS derivative	18748-98-6	C21H46OSi	342.332	1372.43	CCCCCCCCCCCCCCCCCCO	InChI=1/C18H38O/c1-2-3-4-5-6-7-8-9-10-11-12-13-14-15-16-17-18-19/h19H,2-18H2,1H3
	13	2,2'-Thiodipyridine	4262-06-0	C10H8N2S	188.041	461.105	S(c1ccccn1)c2ccccn2	InChI=1/C10H8N2S/c1-3-7-11-9(5-1)13-10-6-2-4-8-12-10/h1-8H
	14	2,3-Butanedione, dioxime	95-45-4	C4H8N2O2	116.059	339.21	CC(=NO)C(C)=NO	InChI=1/C4H8N2O2/c1-3(5-7)4(2)6-8/h7-8H,1-2H3
	15	2-Amino-2-methyl-1,3-propanediol, 2TBDMS derivative	1000366-66-1	C16H39NO2Si2	333.252	957.425	CC(N)(CO)CO	InChI=1/C4H11NO2/c1-4(5,2-6)3-7/h6-7H,2-3,5H2,1H3
	16	2-Amino-4-methyl-4-pentenoic acid	1000133-00-5	C6H11NO2	129.079	523.638	CC(=C)CC(N)C(O)=O	InChI=1/C6H11NO2/c1-4(2)3-5(7)6(8)9/h5H,1,3,7H2,2H3,(H,8,9)/f/h8H
	17	2-Aminobenzoxazole, 2TMS derivative	1000332-41-8	C13H22N2OSi2	278.127	904.698	Nc1oc2ccccc2n1	InChI=1/C7H6N2O/c8-7-9-5-3-1-2-4-6(5)10-7/h1-4H,(H2,8,9)/f/h8H2
	18	2-Bromo dodecane	13187-99-0	C12H25Br	248.114	1076.65	CCCCCCCCCCC(C)Br	InChI=1/C12H25Br/c1-3-4-5-6-7-8-9-10-11-12(2)13/h12H,3-11H2,1-2H3
	19	2-Bromophenazine	3331-28-0	C12H7BrN2	257.979	483.221	Brc1ccc2nc3ccccc3nc2c1	InChI=1/C12H7BrN2/c13-8-5-6-11-12(7-8)15-10-4-2-1-3-9(10)14-11/h1-7H
	20	2-Fluorobenzylamine, N,N-dinonyl	1000310-31-7	C25H44FN	377.346	905.928	CCCCCCCCCN(CCCCCCCCC)Cc1ccccc1F	InChI=1/C25H44FN/c1-3-5-7-9-11-13-17-21-27(22-18-14-12-10-8-6-4-2)23-24-19-15-16-20-25(24)26/h15-16,19-20H,3-14,17-18,21-23H2,1-2H3
	21	2'-Hydroxypropiophenone, TMS derivative	33342-87-9	C12H18O2Si	222.108	1228.44	CCC(=O)c1ccccc1O	InChI=1/C9H10O2/c1-2-8(10)7-5-3-4-6-9(7)11/h3-6,11H,2H2,1H3
	22	2-Methylpentanoic acid, 2,3-dichlorophenyl ester	1000357-38-4	C12H14Cl2O2	260.037	618.349	CCCC(C)C(=O)Oc1cccc(Cl)c1Cl	InChI=1/C12H14Cl2O2/c1-3-5-8(2)12(15)16-10-7-4-6-9(13)11(10)14/h4,6-8H,3,5H2,1-2H3
	23	2-Naphthyl tridecyl ether	1000211-66-3	C23H34O	326.261	1371.64	CCCCCCCCCCCCCOc1ccc2ccccc2c1	InChI=1/C23H34O/c1-2-3-4-5-6-7-8-9-10-11-14-19-24-23-18-17-21-15-12-13-16-22(21)20-23/h12-13,15-18,20H,2-11,14,19H2,1H3
	24	2-Oxovaleric acid, TBDMS derivative	1000353-15-8	C11H22O3Si	230.134	609.603	CCCC(=O)C(O)=O	InChI=1/C5H8O3/c1-2-3-4(6)5(7)8/h2-3H2,1H3,(H,7,8)/f/h7H
	25	2-Propenamide	1979-06-01	C3H5NO	71.037	1811.12	NC(=O)C=C	InChI=1/C3H5NO/c1-2-3(4)5/h2H,1H2,(H2,4,5)/f/h4H2
	26	2-Propenoic acid, 2-methyl-, propyl ester	2210-28-8	C7H12O2	128.084	1566.86	CCCOC(=O)C(C)=C	InChI=1/C7H12O2/c1-4-5-9-7(8)6(2)3/h2,4-5H2,1,3H3
	27	3-Trifluoromethylbenzylamine, N,N-dinonyl	1000310-29-7	C26H44F3N	427.343	1416.7	CCCCCCCCCN(CCCCCCCCC)Cc1cccc(c1)C(F)(F)F	InChI=1/C26H44F3N/c1-3-5-7-9-11-13-15-20-30(21-16-14-12-10-8-6-4-2)23-24-18-17-19-25(22-24)26(27,28)29/h17-19,22H,3-16,20-21,23H2,1-2H3
	28	4-Fluoro-2-methoxyphenol	450-93-1	C7H7FO2	142.043	404.399	COc1cc(F)ccc1O	InChI=1/C7H7FO2/c1-10-7-4-5(8)2-3-6(7)9/h2-4,9H,1H3
	29	4'-Hydroxyvalerophenone, TMS derivative	33342-92-6	C14H22O2Si	250.139	416.201	CCCCC(=O)c1ccc(O)cc1	InChI=1/C11H14O2/c1-2-3-4-11(13)9-5-7-10(12)8-6-9/h5-8,12H,2-4H2,1H3
	30	6-(4-Fluoro-phenyl)-benzo[4,5]imidazo[1,2-c]quinazoline	70371-91-4	C20H12FN3	313.102	1994.72	Fc1ccc(cc1)c2nc3ccccc3c4nc5ccccc5n24	InChI=1/C20H12FN3/c21-14-11-9-13(10-12-14)19-22-16-6-2-1-5-15(16)20-23-17-7-3-4-8-18(17)24(19)20/h1-12H
	31	9,12-Octadecadienoic acid (Z,Z)-, TMS derivative	56259-07-5	C21H40O2Si	352.28	1410.09	CCCCC/C=C/C/C=C/CCCCCCCC(O)=O	InChI=1/C18H32O2/c1-2-3-4-5-6-7-8-9-10-11-12-13-14-15-16-17-18(19)20/h6-7,9-10H,2-5,8,11-17H2,1H3,(H,19,20)/b7-6+,10-9+/f/h19H
	32	9-Hexadecenoic acid, (Z)-, TMS derivative	1000333-19-8	C19H38O2Si	326.264	1282.76	CCCCCC\C=C/CCCCCCCC(O)=O	InChI=1/C16H30O2/c1-2-3-4-5-6-7-8-9-10-11-12-13-14-15-16(17)18/h7-8H,2-6,9-15H2,1H3,(H,17,18)/b8-7-/f/h17H
	33	9-Octadecenoic acid, (E)-, TMS derivative	96851-47-7	C21H42O2Si	354.295	1413.3	CCCCCCCC/C=C/CCCCCCCC(O)=O	InChI=1/C18H34O2/c1-2-3-4-5-6-7-8-9-10-11-12-13-14-15-16-17-18(19)20/h9-10H,2-8,11-17H2,1H3,(H,19,20)/b10-9+/f/h19H
	34	Acetamide, 2-amino-	598-41-4	C2H6N2O	74.048	1547.74	NCC(N)=O	InChI=1/C2H6N2O/c3-1-2(4)5/h1,3H2,(H2,4,5)/f/h4H2
	35	Acetamide, TMS derivative	13435-12-6	C5H13NOSi	131.077	1225.47	CC(N)=O	InChI=1/C2H5NO/c1-2(3)4/h1H3,(H2,3,4)/f/h3H2
	36	Aminomalonic acid, tris(trimethylsilyl)-	1000079-52-5	C12H29NO4Si3	335.14	842.14	C[Si](C)(C)OC(=O)C(N)(C(=O)O[Si](C)(C)C)[Si](C)(C)C	InChI=1/C12H29NO4Si3/c1-18(2,3)12(13,10(14)16-19(4,5)6)11(15)17-20(7,8)9/h13H2,1-9H3
	37	Anthraquinone, 1-(o-chlorophenyl)-	20600-79-7	C20H11ClO2	318.045	658.549	Clc1ccccc1c2cccc3C(=O)c4ccccc4C(=O)c23	InChI=1/C20H11ClO2/c21-17-11-4-3-6-12(17)13-9-5-10-16-18(13)20(23)15-8-2-1-7-14(15)19(16)22/h1-11H
	38	Arachidonic acid, TMS derivative	113516-18-0	C23H40O2Si	376.28	1511.21	CCCCC/C=C\C\C=C/C/C=C\C\C=C/CCCC(O)=O	InChI=1/C20H32O2/c1-2-3-4-5-6-7-8-9-10-11-12-13-14-15-16-17-18-19-20(21)22/h6-7,9-10,12-13,15-16H,2-5,8,11,14,17-19H2,1H3,(H,21,22)/b7-6-,10-9-,13-12-,16-15-/f/h21H
	39	Benzamide, 4-ethyl-N-methallyl-	1000340-34-6	C13H17NO	203.131	836.598	CCc1ccc(cc1)C(=O)NCC(C)=C	InChI=1/C13H17NO/c1-4-11-5-7-12(8-6-11)13(15)14-9-10(2)3/h5-8H,2,4,9H2,1,3H3,(H,14,15)/f/h14H
	40	Benzamide, N-(4-methoxyphenyl)-4-ethyl-	1000307-01-6	C16H17NO2	255.126	1951.29	CCc1ccc(cc1)C(=O)Nc2ccc(OC)cc2	InChI=1/C16H17NO2/c1-3-12-4-6-13(7-5-12)16(18)17-14-8-10-15(19-2)11-9-14/h4-11H,3H2,1-2H3,(H,17,18)/f/h17H
	41	Benzenamine, 3,4-dichloro-	95-76-1	C6H5Cl2N	160.98	503.805	Nc1ccc(Cl)c(Cl)c1	InChI=1/C6H5Cl2N/c7-5-2-1-4(9)3-6(5)8/h1-3H,9H2
	42	Benzene, 1,3-bis(1,1-dimethylethyl)-	1014-60-4	C14H22	190.172	620.995	CC(C)(C)c1cccc(c1)C(C)(C)C	InChI=1/C14H22/c1-13(2,3)11-8-7-9-12(10-11)14(4,5)6/h7-10H,1-6H3
	43	Benzene, 1,4-dichloro-	106-46-7	C6H4Cl2	145.969	364.65	Clc1ccc(Cl)cc1	InChI=1/C6H4Cl2/c7-5-1-2-6(8)4-3-5/h1-4H
	44	Benzene, 1,4-diphenoxy-	3061-36-7	C18H14O2	262.099	911.167	O(c1ccccc1)c2ccc(Oc3ccccc3)cc2	InChI=1/C18H14O2/c1-3-7-15(8-4-1)19-17-11-13-18(14-12-17)20-16-9-5-2-6-10-16/h1-14H
	45	Benzeneethanamine, N,N-dimethyl-	1126-71-2	C10H15N	149.12	1564.42	CN(C)CCc1ccccc1	InChI=1/C10H15N/c1-11(2)9-8-10-6-4-3-5-7-10/h3-7H,8-9H2,1-2H3
	46	Betamethasone acetate	987-24-6	C24H31FO6	434.21	2125.29	C[C@H]1C[C@H]2[C@@H]3CCC4=CC(=O)C=C[C@]4(C)[C@@]3(F)[C@@H](O)C[C@]2(C)[C@@]1(O)C(=O)COC(C)=O	InChI=1/C24H31FO6/c1-13-9-18-17-6-5-15-10-16(27)7-8-21(15,3)23(17,25)19(28)11-22(18,4)24(13,30)20(29)12-31-14(2)26/h7-8,10,13,17-19,28,30H,5-6,9,11-12H2,1-4H3/t13-,17-,18-,19-,21-,22-,23-,24-/m0/s1
	47	Biochanin A, trimethylsilyl ether	1000395-47-2	C19H20O5Si	356.108	1422.17
	48	Bisphenol A, 2TMS derivative	4387-16-0	C21H32O2Si2	372.194	1420.97	CC(C)(c1ccc(O)cc1)c2ccc(O)cc2	InChI=1/C15H16O2/c1-15(2,11-3-7-13(16)8-4-11)12-5-9-14(17)10-6-12/h3-10,16-17H,1-2H3
	49	Butanoyl chloride, 3-methyl-	108-12-3	C5H9ClO	120.034	828.308	CC(C)CC(Cl)=O	InChI=1/C5H9ClO/c1-4(2)3-5(6)7/h4H,3H2,1-2H3
	50	Carbonic acid, monoamide, N-octadecyl-, 2-ethylhexyl ester	1000407-82-3	C27H55NO2	425.423	653.223
	51	Carbonic acid, propyl 4-cyanophenyl ester	1000357-82-1	C11H11NO3	205.074	620.398	CCCOC(=O)Oc1ccc(cc1)C#N	InChI=1/C11H11NO3/c1-2-7-14-11(13)15-10-5-3-9(8-12)4-6-10/h3-6H,2,7H2,1H3
	52	Cholesterol, TMS derivative	1856-05-9	C30H54OSi	458.394	1950.82	CC(C)CCC[C@@H](C)[C@H]1CC[C@H]2[C@@H]3CC=C4C[C@@H](O)CC[C@]4(C)[C@H]3CC[C@]12C	InChI=1/C27H46O/c1-18(2)7-6-8-19(3)23-11-12-24-22-10-9-20-17-21(28)13-15-26(20,4)25(22)14-16-27(23,24)5/h9,18-19,21-25,28H,6-8,10-17H2,1-5H3/t19-,21+,22+,23-,24+,25+,26+,27-/m1/s1
	53	Citric acid, 4TMS derivative	14330-97-3	C18H40O7Si4	480.185	1146.06	OC(=O)CC(O)(CC(O)=O)C(O)=O	InChI=1/C6H8O7/c7-3(8)1-6(13,5(11)12)2-4(9)10/h13H,1-2H2,(H,7,8)(H,9,10)(H,11,12)/f/h7,9,11H
	54	Cyclobutanecarboxylic acid, 2-methylbutyl ester	1000331-08-4	C10H18O2	170.131	432.35	CCC(C)COC(=O)C1CCC1	InChI=1/C10H18O2/c1-3-8(2)7-12-10(11)9-5-4-6-9/h8-9H,3-7H2,1-2H3
	55	Cyclohexanol, TMS derivative	13871-89-1	C9H20OSi	172.128	356.413	OC1CCCCC1	InChI=1/C6H12O/c7-6-4-2-1-3-5-6/h6-7H,1-5H2
	56	Cyclooctasiloxane, hexadecamethyl-	556-68-3	C16H48O8Si8	592.15	1002.93	C[Si]1(C)O[Si](C)(C)O[Si](C)(C)O[Si](C)(C)O[Si](C)(C)O[Si](C)(C)O[Si](C)(C)O[Si](C)(C)O1	InChI=1/C16H48O8Si8/c1-25(2)17-26(3,4)19-28(7,8)21-30(11,12)23-32(15,16)24-31(13,14)22-29(9,10)20-27(5,6)18-25/h1-16H3
	57	D-(-)-Fructose, pentakis(trimethylsilyl) ether, methyloxime (anti)	1000380-18-9	C22H55NO6Si5	569.288	1193
	58	D-(+)-Talose, pentakis(trimethylsilyl) ether, methyloxime (syn)	1000380-18-7	C22H55NO6Si5	569.288	1212.78
	59	Decane	124-18-5	C10H22	142.172	347.613	CCCCCCCCCC	InChI=1/C10H22/c1-3-5-7-9-10-8-6-4-2/h3-10H2,1-2H3
	60	Decane, 3,3,8-trimethyl-	62338-16-3	C13H28	184.219	357.841	CCC(C)CCCCC(C)(C)CC	InChI=1/C13H28/c1-6-12(3)10-8-9-11-13(4,5)7-2/h12H,6-11H2,1-5H3
	61	Decane, 3,6-dimethyl-	17312-53-7	C12H26	170.203	627.192	CCCCC(C)CCC(C)CC	InChI=1/C12H26/c1-5-7-8-12(4)10-9-11(3)6-2/h11-12H,5-10H2,1-4H3
	62	Decane, 3,8-dimethyl-	17312-55-9	C12H26	170.203	1239.6	CCC(C)CCCCC(C)CC	InChI=1/C12H26/c1-5-11(3)9-7-8-10-12(4)6-2/h11-12H,5-10H2,1-4H3
	63	Decane, 4-ethyl-	1636-44-8	C12H26	170.203	606.683	CCCCCCC(CC)CCC	InChI=1/C12H26/c1-4-7-8-9-11-12(6-3)10-5-2/h12H,4-11H2,1-3H3
	64	D-Fructose, 1,3,4,5,6-pentakis-O-(trimethylsilyl)-, O-methyloxime	56196-14-6	C22H55NO6Si5	569.288	1201.35	CO\N=C(/CO[Si](C)(C)C)C(O[Si](C)(C)C)C(O[Si](C)(C)C)C(CO[Si](C)(C)C)O[Si](C)(C)C	InChI=1/C22H55NO6Si5/c1-24-23-19(17-25-30(2,3)4)21(28-33(11,12)13)22(29-34(14,15)16)20(27-32(8,9)10)18-26-31(5,6)7/h20-22H,17-18H2,1-16H3/b23-19+
	65	Disiloxane, hexamethyl-	107-46-0	C6H18OSi2	162.09	534.284	C[Si](C)(C)O[Si](C)(C)C	InChI=1/C6H18OSi2/c1-8(2,3)7-9(4,5)6/h1-6H3
	66	D-Lactose, octakis(trimethylsilyl) ether, methyloxime (isomer 1)	1000380-10-3	C37H89NO11Si8	947.459	1728.98
	67	D-Mannitol, 6TMS derivative	14317-07-8	C24H62O6Si6	614.316	1243.02	OC[C@@H](O)[C@@H](O)[C@H](O)[C@H](O)CO	InChI=1/C6H14O6/c7-1-3(9)5(11)6(12)4(10)2-8/h3-12H,1-2H2/t3-,4-,5-,6-/m1/s1
	68	Docosane, 2,21-dimethyl-	77536-31-3	C24H50	338.391	414.844	CC(C)CCCCCCCCCCCCCCCCCCC(C)C	InChI=1/C24H50/c1-23(2)21-19-17-15-13-11-9-7-5-6-8-10-12-14-16-18-20-22-24(3)4/h23-24H,5-22H2,1-4H3
	69	Dodecane	112-40-3	C12H26	170.203	560.368	CCCCCCCCCCCC	InChI=1/C12H26/c1-3-5-7-9-11-12-10-8-6-4-2/h3-12H2,1-2H3
	70	Dodecane, 1-iodo-	4292-19-7	C12H25I	296.1	1358.96	CCCCCCCCCCCCI	InChI=1/C12H25I/c1-2-3-4-5-6-7-8-9-10-11-12-13/h2-12H2,1H3
	71	Dodecane, 4-methyl-	6117-97-1	C13H28	184.219	583.474	CCCCCCCCC(C)CCC	InChI=1/C13H28/c1-4-6-7-8-9-10-12-13(3)11-5-2/h13H,4-12H2,1-3H3
	72	Dodecane, 6-methyl-	6044-71-9	C13H28	184.219	574.982	CCCCCCC(C)CCCCC	InChI=1/C13H28/c1-4-6-8-10-12-13(3)11-9-7-5-2/h13H,4-12H2,1-3H3
	73	Ethanol, 2,2'-oxybis-	111-46-6	C4H10O3	106.063	541.27	OCCOCCO	InChI=1/C4H10O3/c5-1-3-7-4-2-6/h5-6H,1-4H2
	74	Ethanolamine, 3TMS derivative	5630-81-9	C11H31NOSi3	277.171	637.723	NCCO	InChI=1/C2H7NO/c3-1-2-4/h4H,1-3H2
	75	Ethanone, 2-amino-1-phenyl-	613-89-8	C8H9NO	135.068	412.749	NCC(=O)c1ccccc1	InChI=1/C8H9NO/c9-6-8(10)7-4-2-1-3-5-7/h1-5H,6,9H2
	76	Ether, 2-chloro-1-propyl isopropyl	1000150-65-2	C6H13ClO	136.065	888.135	CC(C)OCC(C)Cl	InChI=1/C6H13ClO/c1-5(2)8-4-6(3)7/h5-6H,4H2,1-3H3
	77	Ethylene glycol, 2TMS derivative	7381-30-8	C8H22O2Si2	206.116	334.937	OCCO	InChI=1/C2H6O2/c3-1-2-4/h3-4H,1-2H2
	78	Glycerol monostearate, 2TMS derivative	1188-75-6	C27H58O4Si2	502.387	1748.55	CCCCCCCCCCCCCCCCCC(O)=O.OCC(O)CO	InChI=1/C18H36O2.C3H8O3/c1-2-3-4-5-6-7-8-9-10-11-12-13-14-15-16-17-18(19)20;4-1-3(6)2-5/h2-17H2,1H3,(H,19,20);3-6H,1-2H2/f/h19H;
	79	Glycerol, 3TMS derivative	6787-10-06	C12H32O3Si3	308.166	648.93	OCC(O)CO	InChI=1/C3H8O3/c4-1-3(6)2-5/h3-6H,1-2H2
	80	Glycine, 3TMS derivative	5630-82-0	C11H29NO2Si3	291.151	679.02	NCC(O)=O	InChI=1/C2H5NO2/c3-1-2(4)5/h1,3H2,(H,4,5)/f/h4H
	81	Heptadecane	629-78-7	C17H36	240.282	854.552	CCCCCCCCCCCCCCCCC	InChI=1/C17H36/c1-3-5-7-9-11-13-15-17-16-14-12-10-8-6-4-2/h3-17H2,1-2H3
	82	Heptadecanoic acid, TMS derivative	55517-58-3	C20H42O2Si	342.295	1364.73	CCCCCCCCCCCCCCCCC(O)=O	InChI=1/C17H34O2/c1-2-3-4-5-6-7-8-9-10-11-12-13-14-15-16-17(18)19/h2-16H2,1H3,(H,18,19)/f/h18H
	83	Heptane, 1,1'-oxybis-	629-64-1	C14H30O	214.23	822.885	CCCCCCCOCCCCCCC	InChI=1/C14H30O/c1-3-5-7-9-11-13-15-14-12-10-8-6-4-2/h3-14H2,1-2H3
	84	Heptane, 3,3-dimethyl-	4032-86-4	C9H20	128.157	534.876	CCCCC(C)(C)CC	InChI=1/C9H20/c1-5-7-8-9(3,4)6-2/h5-8H2,1-4H3
	85	Histamine, 5-chloro-	99221-76-8	C5H8ClN3	145.041	1364.46	NCCc1nc[nH]c1Cl	InChI=1/C5H8ClN3/c6-5-4(1-2-7)8-3-9-5/h3H,1-2,7H2,(H,8,9)/f/h9H
	86	Hydratropic acid, tridec-2-yn-1-yl ester	1000406-96-1	C22H32O2	328.24	521.203	CCCCCCCCCCC#CCOC(=O)C(C)c1ccccc1	InChI=1/C22H32O2/c1-3-4-5-6-7-8-9-10-11-12-16-19-24-22(23)20(2)21-17-14-13-15-18-21/h13-15,17-18,20H,3-11,19H2,1-2H3
	87	Hydroxymethyldiisopropylphosphine	77422-31-2	C7H17OP	148.102	461.695	CC(C)P(CO)C(C)C	InChI=1/C7H17OP/c1-6(2)9(5-8)7(3)4/h6-8H,5H2,1-4H3
	88	Iron tristropolonate	14283-77-3	C21H15FeO6	419.022	682.455	[Fe](|OC1=CC=CC=CC1=O)(|OC2=CC=CC=CC2=O)|OC3=CC=CC=CC3=O	InChI=1/3C7H6O2.Fe/c3*8-6-4-2-1-3-5-7(6)9;/h3*1-5H,(H,8,9);/f/h3*8H;
	89	Isophthalic acid, 4-bromophenyl butyl ester	1000344-46-6	C18H17BrO4	376.031	1213.31	CCCCOC(=O)c1cccc(c1)C(=O)Oc2ccc(Br)cc2	InChI=1/C18H17BrO4/c1-2-3-11-22-17(20)13-5-4-6-14(12-13)18(21)23-16-9-7-15(19)8-10-16/h4-10,12H,2-3,11H2,1H3
	90	Isophthalic acid, 4-isopropylphenyl pentyl ester	1000344-45-5	C22H26O4	354.183	508.528	CCCCCOC(=O)c1cccc(c1)C(=O)Oc2ccc(cc2)C(C)C	InChI=1/C22H26O4/c1-4-5-6-14-25-21(23)18-8-7-9-19(15-18)22(24)26-20-12-10-17(11-13-20)16(2)3/h7-13,15-16H,4-6,14H2,1-3H3
	91	L-5-Oxoproline, , 2TMS derivative	30274-77-2	C11H23NO3Si2	273.122	887.734
	92	Lactic Acid, 2TMS derivative	17596-96-2	C9H22O3Si2	234.111	416.476	CC(O)C(O)=O	InChI=1/C3H6O3/c1-2(4)3(5)6/h2,4H,1H3,(H,5,6)/f/h5H
	93	L-Alanine, 2TMS derivative	27844-07-1	C9H23NO2Si2	233.127	462.016	C[C@H](N)C(O)=O	InChI=1/C3H7NO2/c1-2(4)3(5)6/h2H,4H2,1H3,(H,5,6)/t2-/m0/s1/f/h5H
	94	L-Alanine, N-L-alanyl-	1948-31-8	C6H12N2O3	160.085	404.576	C[C@H](N)C(=O)N[C@@H](C)C(O)=O	InChI=1/C6H12N2O3/c1-3(7)5(9)8-4(2)6(10)11/h3-4H,7H2,1-2H3,(H,8,9)(H,10,11)/t3-,4-/m0/s1/f/h8,10H
	95	L-Glutamic acid, 3TMS derivative	15985-07-6	C14H33NO4Si3	363.172	975.832	N[C@@H](CCC(O)=O)C(O)=O	InChI=1/C5H9NO4/c6-3(5(9)10)1-2-4(7)8/h3H,1-2,6H2,(H,7,8)(H,9,10)/t3-/m0/s1/f/h7,9H
	96	L-Threonine, 3TMS derivative	7537-02-02	C13H33NO3Si3	335.177	763.651	C[C@@H](O)[C@H](N)C(O)=O	InChI=1/C4H9NO3/c1-2(6)3(5)4(7)8/h2-3,6H,5H2,1H3,(H,7,8)/t2-,3+/m1/s1/f/h7H
	97	L-Valine, 2TBDMS derivative	107715-89-9	C17H39NO2Si2	345.252	637.463	CC(C)[C@H](N)C(O)=O	InChI=1/C5H11NO2/c1-3(2)4(6)5(7)8/h3-4H,6H2,1-2H3,(H,7,8)/t4-/m0/s1/f/h7H
	98	L-Valine, 2TMS derivative	7364-44-5	C11H27NO2Si2	261.158	584.791	CC(C)[C@H](N)C(O)=O	InChI=1/C5H11NO2/c1-3(2)4(6)5(7)8/h3-4H,6H2,1-2H3,(H,7,8)/t4-/m0/s1/f/h7H
	99	L-Valine, N-pentafluorobenzoyl-, dodecyl ester	1000346-61-2	C24H34F5NO3	479.246	1096.56
	100	Malic acid, 3TMS derivative	38166-11-9	C13H30O5Si3	350.14	859.656	OC(CC(O)=O)C(O)=O	InChI=1/C4H6O5/c5-2(4(8)9)1-3(6)7/h2,5H,1H2,(H,6,7)(H,8,9)/f/h6,8H
	101	Methoxyacetic acid, 4-tridecyl ester	1000282-04-7	C16H32O3	272.235	848.75	CCCCCCCCCC(CCC)OC(=O)COC	InChI=1/C16H32O3/c1-4-6-7-8-9-10-11-13-15(12-5-2)19-16(17)14-18-3/h15H,4-14H2,1-3H3
	102	Methyl propargyl ether	627-41-8	C4H6O	70.042	559.699	COCC#C	InChI=1/C4H6O/c1-3-4-5-2/h1H,4H2,2H3
	103	Methylpent-4-enylamine	5831-72-1	C6H13N	99.105	368.179	CNCCCC=C	InChI=1/C6H13N/c1-3-4-5-6-7-2/h3,7H,1,4-6H2,2H3
	104	Myo-Inositol, 1,3,4,5,6-pentakis-O-(trimethylsilyl)-, bis(trimethylsilyl) phosphate	33910-06-4	C27H69O9PSi7	764.306	1565.14	C[Si](C)(C)OC1C(O[Si](C)(C)C)C(O[Si](C)(C)C)C(O[P](=O)(O[Si](C)(C)C)O[Si](C)(C)C)C(O[Si](C)(C)C)C1O[Si](C)(C)C	InChI=1/C27H69O9PSi7/c1-38(2,3)30-23-22(29-37(28,35-43(16,17)18)36-44(19,20)21)24(31-39(4,5)6)26(33-41(10,11)12)27(34-42(13,14)15)25(23)32-40(7,8)9/h22-27H,1-21H3
	105	Myo-Inositol, 6TMS derivative	2582-79-8	C24H60O6Si6	612.301	1349.85	OC1C(O)C(O)C(O)C(O)C1O	InChI=1/C6H12O6/c7-1-2(8)4(10)6(12)5(11)3(1)9/h1-12H
	106	Myristic acid, TMS derivative	18603-17-3	C17H36O2Si	300.248	1152.24	CCCCCCCCCCCCCC(O)=O	InChI=1/C14H28O2/c1-2-3-4-5-6-7-8-9-10-11-12-13-14(15)16/h2-13H2,1H3,(H,15,16)/f/h15H
	107	N-.alpha.-Acetyl-L-Lysine, 3TMS derivative	1000333-70-9	C17H40N2O3Si3	404.235	1161.65	CC(=O)NC(CCCCN)C(O)=O	InChI=1/C8H16N2O3/c1-6(11)10-7(8(12)13)4-2-3-5-9/h7H,2-5,9H2,1H3,(H,10,11)(H,12,13)/f/h10,12H
	108	Nonane, 2,2,4,4,6,8,8-heptamethyl-	4390-04-09	C16H34	226.266	362.362	CC(CC(C)(C)C)CC(C)(C)CC(C)(C)C	InChI=1/C16H34/c1-13(10-14(2,3)4)11-16(8,9)12-15(5,6)7/h13H,10-12H2,1-9H3
	109	Nonane, 2,6-dimethyl-	17302-28-2	C11H24	156.188	371.075	CCCC(C)CCCC(C)C	InChI=1/C11H24/c1-5-7-11(4)9-6-8-10(2)3/h10-11H,5-9H2,1-4H3
	110	Nonane, 4,5-dimethyl-	17302-23-7	C11H24	156.188	408.486	CCCCC(C)C(C)CCC	InChI=1/C11H24/c1-5-7-9-11(4)10(3)8-6-2/h10-11H,5-9H2,1-4H3
	111	Octane, 2-methyl-	3221-61-2	C9H20	128.157	456.236	CCCCCCC(C)C	InChI=1/C9H20/c1-4-5-6-7-8-9(2)3/h9H,4-8H2,1-3H3
	112	Oxalic acid, 2TMS derivative	18294-04-7	C8H18O4Si2	234.074	503.528	OC(=O)C(O)=O	InChI=1/C2H2O4/c3-1(4)2(5)6/h(H,3,4)(H,5,6)/f/h3,5H
	113	Oxazole, 5-methyl-2-phenyl-	5221-67-0	C10H9NO	159.068	535.824	Cc1oc(nc1)c2ccccc2	InChI=1/C10H9NO/c1-8-7-11-10(12-8)9-5-3-2-4-6-9/h2-7H,1H3
	114	Oxybutynin	5633-20-5	C22H31NO3	357.23	1428.7	CCN(CC)CC#CCOC(=O)C(O)(C1CCCCC1)c2ccccc2	InChI=1/C22H31NO3/c1-3-23(4-2)17-11-12-18-26-21(24)22(25,19-13-7-5-8-14-19)20-15-9-6-10-16-20/h5,7-8,13-14,20,25H,3-4,6,9-10,15-18H2,1-2H3
	115	Palmitic Acid, TMS derivative	55520-89-3	C19H40O2Si	328.28	1296.96	CCCCCCCCCCCCCCCC(O)=O	InChI=1/C16H32O2/c1-2-3-4-5-6-7-8-9-10-11-12-13-14-15-16(17)18/h2-15H2,1H3,(H,17,18)/f/h17H
	116	Pentadecane	629-62-9	C15H32	212.25	565.728	CCCCCCCCCCCCCCC	InChI=1/C15H32/c1-3-5-7-9-11-13-15-14-12-10-8-6-4-2/h3-15H2,1-2H3
	117	Pentasiloxane, dodecamethyl-	141-63-9	C12H36O4Si5	384.146	542.269	C[Si](C)(C)O[Si](C)(C)O[Si](C)(C)O[Si](C)(C)O[Si](C)(C)C	InChI=1/C12H36O4Si5/c1-17(2,3)13-19(7,8)15-21(11,12)16-20(9,10)14-18(4,5)6/h1-12H3
	118	Perfluoropropionic acid, TBDMS derivative	1000376-29-3	C9H15F5O2Si	278.076	305.921	OC(=O)C(F)(F)C(F)(F)F	InChI=1/C3HF5O2/c4-2(5,1(9)10)3(6,7)8/h(H,9,10)/f/h9H
	119	Phosphoric acid, bis(trimethylsilyl) 2,3-bis[(trimethylsilyl)oxy]propyl ester	31038-11-6	C15H41O6PSi4	460.172	1102.47	C[Si](C)(C)OCC(CO[P](=O)(O[Si](C)(C)C)O[Si](C)(C)C)O[Si](C)(C)C	InChI=1/C15H41O6PSi4/c1-23(2,3)18-14-15(19-24(4,5)6)13-17-22(16,20-25(7,8)9)21-26(10,11)12/h15H,13-14H2,1-12H3
	120	Phosphoryl chloride difluoride	13769-75-0	ClF2OP	119.934	376.346	F[P](F)(Cl)=O	InChI=1/ClF2OP/c1-5(2,3)4
	121	Phosphorylethanolamine, 4TMS derivative	55334-92-4	C14H40NO4PSi4	429.177	1115.38	NCCO[P](O)(O)=O	InChI=1/C2H8NO4P/c3-1-2-7-8(4,5)6/h1-3H2,(H2,4,5,6)/f/h4-5H
	122	Phthalic acid, di(2-propylpentyl) ester	1000377-93-5	C24H38O4	390.277	1617.66	CCCC(CCC)COC(=O)c1ccccc1C(=O)OCC(CCC)CCC	InChI=1/C24H38O4/c1-5-11-19(12-6-2)17-27-23(25)21-15-9-10-16-22(21)24(26)28-18-20(13-7-3)14-8-4/h9-10,15-16,19-20H,5-8,11-14,17-18H2,1-4H3
	123	Phthalic acid, di(3-methylphenyl) ester	1000315-37-3	C22H18O4	346.121	1530.38	Cc1cccc(OC(=O)c2ccccc2C(=O)Oc3cccc(C)c3)c1	InChI=1/C22H18O4/c1-15-7-5-9-17(13-15)25-21(23)19-11-3-4-12-20(19)22(24)26-18-10-6-8-16(2)14-18/h3-14H,1-2H3
	124	Piperazine, 2-methyl-	109-07-9	C5H12N2	100.1	324.014	CC1CNCCN1	InChI=1/C5H12N2/c1-5-4-6-2-3-7-5/h5-7H,2-4H2,1H3
	125	Propylene glycol, 2TMS derivative	17887-27-3	C9H24O2Si2	220.131	351.8	CC(O)CO	InChI=1/C3H8O2/c1-3(5)2-4/h3-5H,2H2,1H3
	126	Pteridine, 2-methyl-	2432-20-4	C7H6N4	146.059	460.614	Cc1ncc2nccnc2n1	InChI=1/C7H6N4/c1-5-10-4-6-7(11-5)9-3-2-8-6/h2-4H,1H3
	127	Scyllo-Inositol, 6TMS derivative	14251-18-4	C24H60O6Si6	612.301	1307.03	OC1C(O)C(O)C(O)C(O)C1O	InChI=1/C6H12O6/c7-1-2(8)4(10)6(12)5(11)3(1)9/h1-12H
	128	Sebacic acid, 4-chloro-3-methylphenyl dodecyl ester	1000354-85-3	C29H47ClO4	494.316	1963.5	CCCCCCCCCCCCOC(=O)CCCCCCCCC(=O)Oc1ccc(Cl)c(C)c1	InChI=1/C29H47ClO4/c1-3-4-5-6-7-8-9-12-15-18-23-33-28(31)19-16-13-10-11-14-17-20-29(32)34-26-21-22-27(30)25(2)24-26/h21-22,24H,3-20,23H2,1-2H3
	129	Serine, 3TMS derivative	64625-17-8	C12H31NO3Si3	321.161	736.581	N[C@@H](CO)C(O)=O	InChI=1/C3H7NO3/c4-2(1-5)3(6)7/h2,5H,1,4H2,(H,6,7)/t2-/m0/s1/f/h6H
	130	Silanamine, N,N'-methanetetraylbis[1,1,1-trimethyl-	1000-70-0	C7H18N2Si2	186.101	311.933	C[Si](C)(C)N=C=N[Si](C)(C)C	InChI=1/C7H18N2Si2/c1-10(2,3)8-7-9-11(4,5)6/h1-6H3
	131	Silanol, trimethyl-, phosphate (3:1)	10497-05-9	C9H27O4PSi3	314.095	647.873	C[Si](C)(C)O.C[Si](C)(C)O.C[Si](C)(C)O.O[P](O)(O)=O	InChI=1/3C3H10OSi.H3O4P/c4*1-5(2,3)4/h3*4H,1-3H3;(H3,1,2,3,4)/f/h;;;1-3H
	132	Stearic acid, TMS derivative	18748-91-9	C21H44O2Si	356.311	1429.65	CCCCCCCCCCCCCCCCCC(O)=O	InChI=1/C18H36O2/c1-2-3-4-5-6-7-8-9-10-11-12-13-14-15-16-17-18(19)20/h2-17H2,1H3,(H,19,20)/f/h19H
	133	Succinic acid, 2-(2-chlorophenoxy)ethyl dodecyl ester	1000381-54-3	C24H37ClO5	440.233	1304.56	CCCCCCCCCCCCOC(=O)CCC(=O)OCCOc1ccccc1Cl	InChI=1/C24H37ClO5/c1-2-3-4-5-6-7-8-9-10-13-18-29-23(26)16-17-24(27)30-20-19-28-22-15-12-11-14-21(22)25/h11-12,14-15H,2-10,13,16-20H2,1H3
	134	Sulfurous acid, 2-ethylhexyl hexyl ester	1000309-20-2	C14H30O3S	278.192	813.69	CCCCCCO[S](=O)OCC(CC)CCCC	InChI=1/C14H30O3S/c1-4-7-9-10-12-16-18(15)17-13-14(6-3)11-8-5-2/h14H,4-13H2,1-3H3
	135	Sulfurous acid, di(2-ethylhexyl) ester	1000309-19-1	C16H34O3S	306.223	1208.41	CCCCC(CC)CO[S](=O)OCC(CC)CCCC	InChI=1/C16H34O3S/c1-5-9-11-15(7-3)13-18-20(17)19-14-16(8-4)12-10-6-2/h15-16H,5-14H2,1-4H3
	136	Tetracosamethyl-cyclododecasiloxane	18919-94-3	C24H72O12Si12	888.226	1621.87	C[Si]1(C)O[Si](C)(C)O[Si](C)(C)O[Si](C)(C)O[Si](C)(C)O[Si](C)(C)O[Si](C)(C)O[Si](C)(C)O[Si](C)(C)O[Si](C)(C)O[Si](C)(C)O[Si](C)(C)O1	InChI=1/C24H72O12Si12/c1-37(2)25-38(3,4)27-40(7,8)29-42(11,12)31-44(15,16)33-46(19,20)35-48(23,24)36-47(21,22)34-45(17,18)32-43(13,14)30-41(9,10)28-39(5,6)26-37/h1-24H3
	137	Tetracosane, 1-iodo-	1000406-32-0	C24H49I	464.288	1041.28	CCCCCCCCCCCCCCCCCCCCCCCCI	InChI=1/C24H49I/c1-2-3-4-5-6-7-8-9-10-11-12-13-14-15-16-17-18-19-20-21-22-23-24-25/h2-24H2,1H3
	138	Tetraethylammonium tetrafluoroborate	429-06-1	C8H20BF4N	217.162	2159.61	CC[N+](CC)(CC)CC.F[B-](F)(F)F	InChI=1/C8H20N.BF4/c1-5-9(6-2,7-3)8-4;2-1(3,4)5/h5-8H2,1-4H3;/q+1;-1
	139	Tetrasiloxane, decamethyl-	141-62-8	C10H30O3Si4	310.127	395.823	C[Si](C)(C)O[Si](C)(C)O[Si](C)(C)O[Si](C)(C)C	InChI=1/C10H30O3Si4/c1-14(2,3)11-16(7,8)13-17(9,10)12-15(4,5)6/h1-10H3
	140	Trifluralin	1582-09-8	C13H16F3N3O4	335.109	1351.48	CCCN(CCC)c1c(cc(cc1[N+]([O-])=O)C(F)(F)F)[N+]([O-])=O	InChI=1/C13H16F3N3O4/c1-3-5-17(6-4-2)12-10(18(20)21)7-9(13(14,15)16)8-11(12)19(22)23/h7-8H,3-6H2,1-2H3
	141	Trimethyl(3,3-difluoro-2-propenyl)silane	40207-81-6	C6H12F2Si	150.068	483.046	C[Si](C)(C)CC=C(F)F	InChI=1/C6H12F2Si/c1-9(2,3)5-4-6(7)8/h4H,5H2,1-3H3
	142	Tripropylene glycol monomethyl ether, TBDMS derivative	1000367-06-9	C16H36O4Si	320.238	366.392	COC(C)COC(C)COC(C)CO	InChI=1/C10H22O4/c1-8(5-11)13-7-10(3)14-6-9(2)12-4/h8-11H,5-7H2,1-4H3
	143	Tris(2,4-di-tert-butylphenyl) phosphate	95906-11-9	C42H63O4P	662.446	1841.65	CC(C)(C)c1ccc(O[P](=O)(Oc2ccc(cc2C(C)(C)C)C(C)(C)C)Oc3ccc(cc3C(C)(C)C)C(C)(C)C)c(c1)C(C)(C)C	InChI=1/C42H63O4P/c1-37(2,3)28-19-22-34(31(25-28)40(10,11)12)44-47(43,45-35-23-20-29(38(4,5)6)26-32(35)41(13,14)15)46-36-24-21-30(39(7,8)9)27-33(36)42(16,17)18/h19-27H,1-18H3
	144	Tris(trimethylsilyl)carbamate	1000366-58-2	C10H27NO2Si3	277.135	388.199
	145	Trisiloxane, octamethyl-	107-51-7	C8H24O2Si3	236.108	697.974	C[Si](C)(C)O[Si](C)(C)O[Si](C)(C)C	InChI=1/C8H24O2Si3/c1-11(2,3)9-13(7,8)10-12(4,5)6/h1-8H3
	146	Tromethamine, 4TMS derivative	136281-54-4	C16H43NO3Si4	409.232	885.161	NC(CO)(CO)CO	InChI=1/C4H11NO3/c5-4(1-6,2-7)3-8/h6-8H,1-3,5H2
	147	Undecane, 3,7-dimethyl-	17301-29-0	C13H28	184.219	644.356	CCCCC(C)CCCC(C)CC	InChI=1/C13H28/c1-5-7-9-13(4)11-8-10-12(3)6-2/h12-13H,5-11H2,1-4H3
	148	Undecane, 4,4-dimethyl-	17312-68-4	C13H28	184.219	672.53	CCCCCCCC(C)(C)CCC	InChI=1/C13H28/c1-5-7-8-9-10-12-13(3,4)11-6-2/h5-12H2,1-4H3
	149	Undecane, 4-ethyl-	17312-59-3	C13H28	184.219	895.617	CCCCCCCC(CC)CCC	InChI=1/C13H28/c1-4-7-8-9-10-12-13(6-3)11-5-2/h13H,4-12H2,1-3H3
	150	Uracil, 2TMS derivative	10457-14-4	C10H20N2O2Si2	256.106	711.657	O=C1NC=CC(=O)N1	InChI=1/C4H4N2O2/c7-3-1-2-5-4(8)6-3/h1-2H,(H2,5,6,7,8)/f/h5-6H
	151	Urea, 2TMS derivative	18297-63-7	C7H20N2OSi2	204.111	609.482	NC(N)=O	InChI=1/CH4N2O/c2-1(3)4/h(H4,2,3,4)/f/h2-3H2
Serum	1	(2S,3R)-3-[(4E,7E)-Nona-4,7-dienoyl]-N,N-bis(trimethylsilyl)oxirane-2-carboxamide	1000395-61-1	C18H33NO3Si2	367.2	482.731	C/C=C/C/C=C/CCC(=O)[C@@H]1O[C@@H]1C(=O)N([Si](C)(C)C)[Si](C)(C)C	InChI=1/C18H33NO3Si2/c1-8-9-10-11-12-13-14-15(20)16-17(22-16)18(21)19(23(2,3)4)24(5,6)7/h8-9,11-12,16-17H,10,13-14H2,1-7H3/b9-8+,12-11+/t16-,17-/m0/s1
	2	.+/-.-8-Oxocephalotaxine	114942-84-6	C18H19NO5	329.126	1294.92	COC1=CC23CCC(=O)N2CCc4cc5OCOc5cc4C3C1O	InChI=1/C18H19NO5/c1-22-14-8-18-4-2-15(20)19(18)5-3-10-6-12-13(24-9-23-12)7-11(10)16(18)17(14)21/h6-8,16-17,21H,2-5,9H2,1H3
	3	.beta.-D-Lactose, (isomer 2), 8TMS derivative	1000380-08-8	C36H86O11Si8	918.432	1270.48
	4	1,3-Propanediol	504-63-2	C3H8O2	76.052	370.843	OCCCO	InChI=1/C3H8O2/c4-2-1-3-5/h4-5H,1-3H2
	5	1,5-Anhydrohexitol, 4TMS derivative	1000380-13-8	C18H44O5Si4	452.227	1170.43	OCC1OCC(O)C(O)C1O	InChI=1/C6H12O5/c7-1-4-6(10)5(9)3(8)2-11-4/h3-10H,1-2H2
	6	10-Chloro-1-decanol, TMS derivative	34714-01-7	C13H29ClOSi	264.168	363.105	OCCCCCCCCCCCl	InChI=1/C10H21ClO/c11-9-7-5-3-1-2-4-6-8-10-12/h12H,1-10H2
	7	1-Bromo-4-(2,3-dichloro-1,1,2,3,3-pentafluoropropyl)-2,3,5,6-tetrafluorobenzene	1000389-30-1	C9BrCl2F9	427.842	906.843	Fc1c(F)c(c(F)c(F)c1Br)C(F)(F)C(F)(Cl)C(F)(F)Cl	InChI=1/C9BrCl2F9/c10-2-5(15)3(13)1(4(14)6(2)16)7(17,18)8(11,19)9(12,20)21
	8	1-Hexadecanol, TBDMS derivative	76358-80-0	C22H48OSi	356.347	830.023	CCCCCCCCCCCCCCCCO	InChI=1/C16H34O/c1-2-3-4-5-6-7-8-9-10-11-12-13-14-15-16-17/h17H,2-16H2,1H3
	9	1H-Pyrazolo[3,4-b]pyridin-6-ol, 4-trifluoromethyl-1,3-dimethyl-	94835-66-2	C9H8F3N3O	231.062	1250.18	Cn1nc(C)c2c(cc(O)nc12)C(F)(F)F	InChI=1/C9H8F3N3O/c1-4-7-5(9(10,11)12)3-6(16)13-8(7)15(2)14-4/h3H,1-2H3,(H,13,16)/f/h16H
	10	1-Isobutylsulfanylmethyl-2,8,9-trioxa-5-aza-1-sila-bicyclo[3.3.3]undecane	69821-15-4	C11H23NO3SSi	277.117	1576.82	CC(C)CSC[Si]12OCCN(CCO1)CCO2	InChI=1/C11H23NO3SSi/c1-11(2)9-16-10-17-13-6-3-12(4-7-14-17)5-8-15-17/h11H,3-10H2,1-2H3
	11	1-Methyl-N,N-bis(trimethylsilyl)-4-[(trimethylsilyl)oxy]-1H-imidazol-2-amine	1000333-94-6	C13H31N3OSi3	329.177	919.081	Cn1cc(O[Si](C)(C)C)nc1N([Si](C)(C)C)[Si](C)(C)C	InChI=1/C13H31N3OSi3/c1-15-11-12(17-20(8,9)10)14-13(15)16(18(2,3)4)19(5,6)7/h11H,1-10H3
	12	1-Octadecanol, TMS derivative	18748-98-6	C21H46OSi	342.332	1372.13	CCCCCCCCCCCCCCCCCCO	InChI=1/C18H38O/c1-2-3-4-5-6-7-8-9-10-11-12-13-14-15-16-17-18-19/h19H,2-18H2,1H3
	13	2-(3-Cyano-4-thiophen-2-yl-5,6,7,8-tetrahydro-quinolin-2-ylsulfanyl)-acetamide	210766-87-3	C16H15N3OS2	329.066	1296.57	NC(=O)CSc1nc2CCCCc2c(c3sccc3)c1C#N	InChI=1/C16H15N3OS2/c17-8-11-15(13-6-3-7-21-13)10-4-1-2-5-12(10)19-16(11)22-9-14(18)20/h3,6-7H,1-2,4-5,9H2,(H2,18,20)/f/h18H2
	14	2,3,7,7,12,13,17,18-Octaethyl-21H,23H-porphine-8-one	74071-47-9	C36H46N4O	550.367	1524.2	CCc1c2[nH]c(cc3nc(cc4[nH]c(cc5nc(c2)C(=O)C5(CC)CC)c(CC)c4CC)c(CC)c3CC)c1CC	InChI=1/C36H46N4O/c1-9-21-22(10-2)28-18-30-25(13-5)26(14-6)32(39-30)20-34-36(15-7,16-8)35(41)33(40-34)19-31-24(12-4)23(11-3)29(38-31)17-27(21)37-28/h17-20,38-39H,9-16H2,1-8H3
	15	2,3,7,8,12,13,17,18-Octapropyl-21H,23H-porphine	73405-54-6	C44H62N4	646.497	1845.79	CCCc1c2[nH]c(cc3nc(cc4[nH]c(cc5nc(c2)c(CCC)c5CCC)c(CCC)c4CCC)c(CCC)c3CCC)c1CCC	InChI=1/C44H62N4/c1-9-17-29-30(18-10-2)38-26-40-33(21-13-5)34(22-14-6)42(47-40)28-44-36(24-16-8)35(23-15-7)43(48-44)27-41-32(20-12-4)31(19-11-3)39(46-41)25-37(29)45-38/h25-28,45,48H,9-24H2,1-8H3
	16	2,4,5-Trifluoro-3-methoxybenzamide, N-(4-fluorophenyl)-	1000358-06-5	C14H9F4NO2	299.057	640.236	COc1c(F)c(F)cc(C(=O)Nc2ccc(F)cc2)c1F	InChI=1/C14H9F4NO2/c1-21-13-11(17)9(6-10(16)12(13)18)14(20)19-8-4-2-7(15)3-5-8/h2-6H,1H3,(H,19,20)/f/h19H
	17	2,4-Bis[2-(4'-hydroxyphenyl)propan-2-yl]phenol, 3TMS derivative	155726-86-6	C33H50O3Si3	578.307	1438.01
	18	2-Aminobenzoxazole, 2TMS derivative	1000332-41-8	C13H22N2OSi2	278.127	903.989	Nc1oc2ccccc2n1	InChI=1/C7H6N2O/c8-7-9-5-3-1-2-4-6(5)10-7/h1-4H,(H2,8,9)/f/h8H2
	19	2-Butenedioic acid, (E)-, 2TMS derivative	17962-03-7	C10H20O4Si2	260.09	975.595	OC(=O)/C=C/C(O)=O	InChI=1/C4H4O4/c5-3(6)1-2-4(7)8/h1-2H,(H,5,6)(H,7,8)/b2-1+/f/h5,7H
	20	2-Cyclohexen-3,6-diol-1-one, 2-[11-phenundecanoyl]-	140614-61-5	C23H32O4	372.23	794.78
	21	2-Fluorobenzylamine, N,N-dinonyl	1000310-31-7	C25H44FN	377.346	902.737	CCCCCCCCCN(CCCCCCCCC)Cc1ccccc1F	InChI=1/C25H44FN/c1-3-5-7-9-11-13-17-21-27(22-18-14-12-10-8-6-4-2)23-24-19-15-16-20-25(24)26/h15-16,19-20H,3-14,17-18,21-23H2,1-2H3
	22	2-Methallyl alcohol, TMS derivative	25195-85-1	C7H16OSi	144.097	1309.63
	23	2-Methoxy-1,3-dioxolane	19693-75-5	C4H8O3	104.047	416.847	COC1OCCO1	InChI=1/C4H8O3/c1-5-4-6-2-3-7-4/h4H,2-3H2,1H3
	24	2-Methyl-1-butanol, TMS derivative	18246-67-8	C8H20OSi	160.128	786.217	CCC(C)CO	InChI=1/C5H12O/c1-3-5(2)4-6/h5-6H,3-4H2,1-2H3
	25	2-Methylaminomethyl-1,3-dioxolane	57366-77-5	C5H11NO2	117.079	1212.9	CNCC1OCCO1	InChI=1/C5H11NO2/c1-6-4-5-7-2-3-8-5/h5-6H,2-4H2,1H3
	26	3,5-Dichlorobenzoic acid	51-36-5	C7H4Cl2O2	189.959	424.937	OC(=O)c1cc(Cl)cc(Cl)c1	InChI=1/C7H4Cl2O2/c8-5-1-4(7(10)11)2-6(9)3-5/h1-3H,(H,10,11)/f/h10H
	27	3-.alpha.-Mannobiose, octakis(trimethylsilyl) ether (isomer 2)	1000380-09-6	C36H86O11Si8	918.432	1252.64
	28	3-Ethyl-3-methylheptane	17302-01-1	C10H22	142.172	455.709	CCCCC(C)(CC)CC	InChI=1/C10H22/c1-5-8-9-10(4,6-2)7-3/h5-9H2,1-4H3
	29	3-Hexanone	589-38-8	C6H12O	100.089	848.1	CCCC(=O)CC	InChI=1/C6H12O/c1-3-5-6(7)4-2/h3-5H2,1-2H3
	30	3-Hydroxybutyric acid, 2TMS derivative	55133-94-3	C10H24O3Si2	248.126	523.909	CC(O)CC(O)=O	InChI=1/C4H8O3/c1-3(5)2-4(6)7/h3,5H,2H2,1H3,(H,6,7)/f/h6H
	31	3-Hydroxypicolinic acid, 2TMS derivative	36972-81-3	C12H21NO3Si2	283.106	925.503	OC(=O)c1ncccc1O	InChI=1/C6H5NO3/c8-4-2-1-3-7-5(4)6(9)10/h1-3,8H,(H,9,10)/f/h9H
	32	4-Hydroxybutanoic acid, 2TMS derivative	55133-95-4	C10H24O3Si2	248.126	784.768	OCCCC(O)=O	InChI=1/C4H8O3/c5-3-1-2-4(6)7/h5H,1-3H2,(H,6,7)/f/h6H
	33	5-Cyano-2-methyl-4-methylthio-6-phenylpyrimidine	68364-38-5	C13H11N3S	241.067	544.93	CSc1nc(C)nc(c2ccccc2)c1C#N	InChI=1/C13H11N3S/c1-9-15-12(10-6-4-3-5-7-10)11(8-14)13(16-9)17-2/h3-7H,1-2H3
	34	5-Hexen-3-one	24253-30-3	C6H10O	98.073	413.978	CCC(=O)CC=C	InChI=1/C6H10O/c1-3-5-6(7)4-2/h3H,1,4-5H2,2H3
	35	6H-[1,3]Dioxolo[5,6]benzofuro[3,2-c][1]benzopyran-2-ol, 6a,12a-dihydro-3-methoxy-, (6ar-cis)-	30461-92-8	C17H14O6	314.079	1297.15	COc1cc2OCC3C(Oc4cc5OCOc5cc34)c2cc1O	InChI=1/C17H14O6/c1-19-14-4-12-9(2-11(14)18)17-10(6-20-12)8-3-15-16(22-7-21-15)5-13(8)23-17/h2-5,10,17-18H,6-7H2,1H3
	36	7-Chloro-s-triazolo[1,5-c]pyrimidin-5-(1H)-one	1000212-12-1	C5H3ClN4O	170	313.7	ClC1=NC(=O)N2NC=NC2=C1	InChI=1/C5H3ClN4O/c6-3-1-4-7-2-8-10(4)5(11)9-3/h1-2H,(H,7,8)/f/h8H
	37	8-Cyclopropylcaffeine	1000257-37-9	C11H14N4O2	234.112	1211.34	CN1C(=O)N(C)c2nc(C3CC3)n(C)c2C1=O	InChI=1/C11H14N4O2/c1-13-7-9(12-8(13)6-4-5-6)14(2)11(17)15(3)10(7)16/h6H,4-5H2,1-3H3
	38	9,12-Octadecadienoic acid (Z,Z)-, TMS derivative	56259-07-5	C21H40O2Si	352.28	1409.82	CCCCC/C=C/C/C=C/CCCCCCCC(O)=O	InChI=1/C18H32O2/c1-2-3-4-5-6-7-8-9-10-11-12-13-14-15-16-17-18(19)20/h6-7,9-10H,2-5,8,11-17H2,1H3,(H,19,20)/b7-6+,10-9+/f/h19H
	39	9-Octadecenoic acid, (E)-, TMS derivative	96851-47-7	C21H42O2Si	354.295	1412.5	CCCCCCCC/C=C/CCCCCCCC(O)=O	InChI=1/C18H34O2/c1-2-3-4-5-6-7-8-9-10-11-12-13-14-15-16-17-18(19)20/h9-10H,2-8,11-17H2,1H3,(H,19,20)/b10-9+/f/h19H
	40	acetamide, 2,2,2-trifluoro-N-[4-[2-(1,2,3,8,9,10-hexahydro-3,8-dimethyl-3,8-diundecylbenzo[1,2-b:4,3-b']dipyran-5-yl)ethyl]phenyl]-	1000400-01-9	C46H70F3NO3	741.531	590.634	CCCCCCCCCCCC1(C)CCc2c3CCC(C)(CCCCCCCCCCC)Oc3c(CCc4ccc(NC(=O)C(F)(F)F)cc4)cc2O1	InChI=1/C46H70F3NO3/c1-5-7-9-11-13-15-17-19-21-31-44(3)33-29-39-40-30-34-45(4,32-22-20-18-16-14-12-10-8-6-2)53-42(40)37(35-41(39)52-44)26-23-36-24-27-38(28-25-36)50-43(51)46(47,48)49/h24-25,27-28,35H,5-23,26,29-34H2,1-4H3,(H,50,51)/f/h50H
	41	Acetamide, N-[2,4-bis(1,1-dimethylethyl)phenyl]-	38896-23-0	C16H25NO	247.194	505.32	CC(=O)Nc1ccc(cc1C(C)(C)C)C(C)(C)C	InChI=1/C16H25NO/c1-11(18)17-14-9-8-12(15(2,3)4)10-13(14)16(5,6)7/h8-10H,1-7H3,(H,17,18)/f/h17H
	42	Alizarin, 2TMS derivative	7336-61-0	C20H24O4Si2	384.121	1948.02	Oc1ccc2C(=O)c3ccccc3C(=O)c2c1O	InChI=1/C14H8O4/c15-10-6-5-9-11(14(10)18)13(17)8-4-2-1-3-7(8)12(9)16/h1-6,15,18H
	43	Aminomalonic acid, tris(trimethylsilyl)-	1000079-52-5	C12H29NO4Si3	335.14	841.826	C[Si](C)(C)OC(=O)C(N)(C(=O)O[Si](C)(C)C)[Si](C)(C)C	InChI=1/C12H29NO4Si3/c1-18(2,3)12(13,10(14)16-19(4,5)6)11(15)17-20(7,8)9/h13H2,1-9H3
	44	Anhydro 5-mercapto-3-methyl-1,2,3,4-oxatriazolium hydroxide	1000256-13-4	C2H3N3OS	117	416.444
	45	Benzamide, 4-ethyl-N-methallyl-	1000340-34-6	C13H17NO	203.131	836.402	CCc1ccc(cc1)C(=O)NCC(C)=C	InChI=1/C13H17NO/c1-4-11-5-7-12(8-6-11)13(15)14-9-10(2)3/h5-8H,2,4,9H2,1,3H3,(H,14,15)/f/h14H
	46	Benzamide, N-(3-chlorophenyl)-2-fluoro-	1000307-08-1	C13H9ClFNO	249.036	2117.14	Fc1ccccc1C(=O)Nc2cccc(Cl)c2	InChI=1/C13H9ClFNO/c14-9-4-3-5-10(8-9)16-13(17)11-6-1-2-7-12(11)15/h1-8H,(H,16,17)/f/h16H
	47	benzene, 1,1'-methylenebis[3-(1,1-dimethylethyl)-5-methyl-4-[(trimethylsilyl)oxy]-	1000399-56-2	C29H48O2Si2	484.319	1607.41	Cc1cc(Cc2cc(C)c(O[Si](C)(C)C)c(c2)C(C)(C)C)cc(c1O[Si](C)(C)C)C(C)(C)C	InChI=1/C29H48O2Si2/c1-20-15-22(18-24(28(3,4)5)26(20)30-32(9,10)11)17-23-16-21(2)27(31-33(12,13)14)25(19-23)29(6,7)8/h15-16,18-19H,17H2,1-14H3
	48	Benzene, 1,3-bis(1,1-dimethylethyl)-	1014-60-4	C14H22	190.172	620.389	CC(C)(C)c1cccc(c1)C(C)(C)C	InChI=1/C14H22/c1-13(2,3)11-8-7-9-12(10-11)14(4,5)6/h7-10H,1-6H3
	49	Bis(2-(Dimethylamino)ethyl) ether	3033-62-3	C8H20N2O	160.158	1455.21	CN(C)CCOCCN(C)C	InChI=1/C8H20N2O/c1-9(2)5-7-11-8-6-10(3)4/h5-8H2,1-4H3
	50	Bisphenol A monomethyl ether, TMS derivative	1000283-55-5	C19H26O2Si	314.17	962.768	COC.CC(C)(c1ccc(O)cc1)c2ccc(O)cc2	InChI=1/C15H16O2.C2H6O/c1-15(2,11-3-7-13(16)8-4-11)12-5-9-14(17)10-6-12;1-3-2/h3-10,16-17H,1-2H3;1-2H3
	51	Bisphenol A, 2TMS derivative	4387-16-0	C21H32O2Si2	372.194	1420.84	CC(C)(c1ccc(O)cc1)c2ccc(O)cc2	InChI=1/C15H16O2/c1-15(2,11-3-7-13(16)8-4-11)12-5-9-14(17)10-6-12/h3-10,16-17H,1-2H3
	52	Butanedioic acid, 2TMS derivative	40309-57-7	C10H22O4Si2	262.106	682.695	OC(=O)CCC(O)=O	InChI=1/C4H6O4/c5-3(6)1-2-4(7)8/h1-2H2,(H,5,6)(H,7,8)/f/h5,7H
	53	Cholesterol, TMS derivative	1856-05-9	C30H54OSi	458.394	1950.34	CC(C)CCC[C@@H](C)[C@H]1CC[C@H]2[C@@H]3CC=C4C[C@@H](O)CC[C@]4(C)[C@H]3CC[C@]12C	InChI=1/C27H46O/c1-18(2)7-6-8-19(3)23-11-12-24-22-10-9-20-17-21(28)13-15-26(20,4)25(22)14-16-27(23,24)5/h9,18-19,21-25,28H,6-8,10-17H2,1-5H3/t19-,21+,22+,23-,24+,25+,26+,27-/m1/s1
	54	Citric acid, 4TMS derivative	14330-97-3	C18H40O7Si4	480.185	1145.03	OC(=O)CC(O)(CC(O)=O)C(O)=O	InChI=1/C6H8O7/c7-3(8)1-6(13,5(11)12)2-4(9)10/h13H,1-2H2,(H,7,8)(H,9,10)(H,11,12)/f/h7,9,11H
	55	D-(+)-Talose, pentakis(trimethylsilyl) ether, methyloxime (syn)	1000380-18-7	C22H55NO6Si5	569.288	1203.5
	56	D-Arabinose, tetrakis(trimethylsilyl) ether, ethyloxime (isomer 2)	1000394-64-9	C19H47NO5Si4	481.253	1035.12
	57	Decane	124-18-5	C10H22	142.172	347.248	CCCCCCCCCC	InChI=1/C10H22/c1-3-5-7-9-10-8-6-4-2/h3-10H2,1-2H3
	58	Decane, 4-methyl-	2847-72-5	C11H24	156.188	370.591	CCCCCCC(C)CCC	InChI=1/C11H24/c1-4-6-7-8-10-11(3)9-5-2/h11H,4-10H2,1-3H3
	59	D-Fructose, 1,3,4,5,6-pentakis-O-(trimethylsilyl)-, O-methyloxime	56196-14-6	C22H55NO6Si5	569.288	1193	CO\N=C(/CO[Si](C)(C)C)C(O[Si](C)(C)C)C(O[Si](C)(C)C)C(CO[Si](C)(C)C)O[Si](C)(C)C	InChI=1/C22H55NO6Si5/c1-24-23-19(17-25-30(2,3)4)21(28-33(11,12)13)22(29-34(14,15)16)20(27-32(8,9)10)18-26-31(5,6)7/h20-22H,17-18H2,1-16H3/b23-19+
	60	D-Galactose, 5TMS derivative	6736-94-3	C21H52O6Si5	540.261	1307.2	OC[C@@H](O)[C@H](O)[C@H](O)[C@@H](O)C=O	InChI=1/C6H12O6/c7-1-3(9)5(11)6(12)4(10)2-8/h1,3-6,8-12H,2H2/t3-,4+,5+,6-/m0/s1
	61	D-Glucopyranose, 5TMS derivative	19126-99-9	C21H52O6Si5	540.261	1271.07	OC[C@H]1OC(O)[C@H](O)[C@@H](O)[C@@H]1O	InChI=1/C6H12O6/c7-1-2-3(8)4(9)5(10)6(11)12-2/h2-11H,1H2/t2-,3-,4+,5-,6?/m1/s1
	62	d-Glucose, 2,3,4,5,6-pentakis-O-(trimethylsilyl)-, o-methyloxyme, (1E)-	130405-10-6	C22H55NO6Si5	569.288	1226.28	CO\N=C\C(O[Si](C)(C)C)C(O[Si](C)(C)C)C(O[Si](C)(C)C)C(CO[Si](C)(C)C)O[Si](C)(C)C	InChI=1/C22H55NO6Si5/c1-24-23-17-19(26-31(5,6)7)21(28-33(11,12)13)22(29-34(14,15)16)20(27-32(8,9)10)18-25-30(2,3)4/h17,19-22H,18H2,1-16H3/b23-17+
	63	d-Glucose, 2,3,4,5,6-pentakis-O-(trimethylsilyl)-, o-methyloxyme, (1Z)-	128705-73-7	C22H55NO6Si5	569.288	1212.45	CO\N=C/C(O[Si](C)(C)C)C(O[Si](C)(C)C)C(O[Si](C)(C)C)C(CO[Si](C)(C)C)O[Si](C)(C)C	InChI=1/C22H55NO6Si5/c1-24-23-17-19(26-31(5,6)7)21(28-33(11,12)13)22(29-34(14,15)16)20(27-32(8,9)10)18-25-30(2,3)4/h17,19-22H,18H2,1-16H3/b23-17-
	64	Diethanolnitrosamine, 2TMS derivative	69981-29-9	C10H26N2O3Si2	278.148	783.684	OCCN(CCO)N=O	InChI=1/C4H10N2O3/c7-3-1-6(5-9)2-4-8/h7-8H,1-4H2
	65	Diethylmalonic acid, diphenethyl ester	1000369-56-1	C23H28O4	368.199	520.712	CCC(CC)(C(=O)OCCc1ccccc1)C(=O)OCCc2ccccc2	InChI=1/C23H28O4/c1-3-23(4-2,21(24)26-17-15-19-11-7-5-8-12-19)22(25)27-18-16-20-13-9-6-10-14-20/h5-14H,3-4,15-18H2,1-2H3
	66	Dimethyl tartarate (R*,R*)-, 2TMS derivative	53225-49-3	C12H26O6Si2	322.127	515.078
	67	DL-Ornithine, 4TMS derivative	1000333-13-9	C17H44N2O2Si4	420.248	1139.11	NCCCC(N)C(O)=O	InChI=1/C5H12N2O2/c6-3-1-2-4(7)5(8)9/h4H,1-3,6-7H2,(H,8,9)/f/h8H
	68	D-Mannitol, 6TMS derivative	14317-07-8	C24H62O6Si6	614.316	1241.92	OC[C@@H](O)[C@@H](O)[C@H](O)[C@H](O)CO	InChI=1/C6H14O6/c7-1-3(9)5(11)6(12)4(10)2-8/h3-12H,1-2H2/t3-,4-,5-,6-/m1/s1
	69	Dodecane, 2,6,11-trimethyl-	31295-56-4	C15H32	212.25	408.26	CC(C)CCCCC(C)CCCC(C)C	InChI=1/C15H32/c1-13(2)9-6-7-11-15(5)12-8-10-14(3)4/h13-15H,6-12H2,1-5H3
	70	Eicosane, 1-iodo-	1000406-31-8	C20H41I	408.225	854.145	CCCCCCCCCCCCCCCCCCCCI	InChI=1/C20H41I/c1-2-3-4-5-6-7-8-9-10-11-12-13-14-15-16-17-18-19-20-21/h2-20H2,1H3
	71	Ethaneperoxoic acid, 1-cyano-4,4-dimethyl-1-phenylpentyl ester	58422-75-6	C16H21NO3	275.152	1841.3	CC(=O)OOC(CCC(C)(C)C)(C#N)c1ccccc1	InChI=1/C16H21NO3/c1-13(18)19-20-16(12-17,11-10-15(2,3)4)14-8-6-5-7-9-14/h5-9H,10-11H2,1-4H3
	72	Ethanone, 1-(2-hydroxy-4-methoxyphenyl)-	552-41-0	C9H10O3	166.063	405.56	COc1ccc(C(C)=O)c(O)c1	InChI=1/C9H10O3/c1-6(10)8-4-3-7(12-2)5-9(8)11/h3-5,11H,1-2H3
	73	Ethylene glycol, 2TMS derivative	7381-30-8	C8H22O2Si2	206.116	334.582	OCCO	InChI=1/C2H6O2/c3-1-2-4/h3-4H,1-2H2
	74	Glycerol, 3TMS derivative	6787-10-06	C12H32O3Si3	308.166	648.454	OCC(O)CO	InChI=1/C3H8O3/c4-1-3(6)2-5/h3-6H,1-2H2
	75	Glycine, 3TMS derivative	5630-82-0	C11H29NO2Si3	291.151	678.659	NCC(O)=O	InChI=1/C2H5NO2/c3-1-2(4)5/h1,3H2,(H,4,5)/f/h4H
	76	Glycolic acid, 2TMS derivative	33581-77-0	C8H20O3Si2	220.095	431.472	OCC(O)=O	InChI=1/C2H4O3/c3-1-2(4)5/h3H,1H2,(H,4,5)/f/h4H
	77	Heptadecanoic acid, TMS derivative	55517-58-3	C20H42O2Si	342.295	1363.93	CCCCCCCCCCCCCCCCC(O)=O	InChI=1/C17H34O2/c1-2-3-4-5-6-7-8-9-10-11-12-13-14-15-16-17(18)19/h2-16H2,1H3,(H,18,19)/f/h18H
	78	Hexane, 3,3-dimethyl-	563-16-6	C8H18	114.141	583.167	CCCC(C)(C)CC	InChI=1/C8H18/c1-5-7-8(3,4)6-2/h5-7H2,1-4H3
	79	L-5-Oxoproline, , 2TMS derivative	30274-77-2	C11H23NO3Si2	273.122	886.708
	80	Lactic Acid, 2TMS derivative	17596-96-2	C9H22O3Si2	234.111	416.507	CC(O)C(O)=O	InChI=1/C3H6O3/c1-2(4)3(5)6/h2,4H,1H3,(H,5,6)/f/h5H
	81	L-Alanine, 2TMS derivative	27844-07-1	C9H23NO2Si2	233.127	461.5	C[C@H](N)C(O)=O	InChI=1/C3H7NO2/c1-2(4)3(5)6/h2H,4H2,1H3,(H,5,6)/t2-/m0/s1/f/h5H
	82	L-Hydroxyproline, (E)-, 3TMS derivative	55429-66-8	C14H33NO3Si3	347.177	893.076
	83	L-Isoleucine, 2TMS derivative	7483-92-3	C12H29NO2Si2	275.174	666.194	CC[C@H](C)[C@H](N)C(O)=O	InChI=1/C6H13NO2/c1-3-4(2)5(7)6(8)9/h4-5H,3,7H2,1-2H3,(H,8,9)/t4-,5-/m0/s1/f/h8H
	84	L-Leucine, 2TMS derivative	7364-46-7	C12H29NO2Si2	275.174	643.621	CC(C)C[C@H](N)C(O)=O	InChI=1/C6H13NO2/c1-4(2)3-5(7)6(8)9/h4-5H,3,7H2,1-2H3,(H,8,9)/t5-/m0/s1/f/h8H
	85	L-Lysine, 4TMS derivative	55429-07-7	C18H46N2O2Si4	434.264	1217.67	NCCCC[C@H](N)C(O)=O	InChI=1/C6H14N2O2/c7-4-2-1-3-5(8)6(9)10/h5H,1-4,7-8H2,(H,9,10)/t5-/m0/s1/f/h9H
	86	L-Proline, 2TMS derivative	7364-47-8	C11H25NO2Si2	259.142	668.104	OC(=O)[C@@H]1CCCN1	InChI=1/C5H9NO2/c7-5(8)4-2-1-3-6-4/h4,6H,1-3H2,(H,7,8)/t4-/m0/s1/f/h7H
	87	l-Proline, N-(2-chloroethoxycarbonyl)-, pentyl ester	1000328-49-1	C13H22ClNO4	291.124	621.593	CCCCCOC(=O)[C@@H]1CCCN1C(=O)OCCCl	InChI=1/C13H22ClNO4/c1-2-3-4-9-18-12(16)11-6-5-8-15(11)13(17)19-10-7-14/h11H,2-10H2,1H3/t11-/m0/s1
	88	L-Threonic acid, tris(trimethylsilyl) ether, trimethylsilyl ester	1000352-53-3	C16H40O5Si4	424.195	930.417
	89	L-Threonine, 3TMS derivative	7537-02-02	C13H33NO3Si3	335.177	762.947	C[C@@H](O)[C@H](N)C(O)=O	InChI=1/C4H9NO3/c1-2(6)3(5)4(7)8/h2-3,6H,5H2,1H3,(H,7,8)/t2-,3+/m1/s1/f/h7H
	90	L-Valine, 2TMS derivative	7364-44-5	C11H27NO2Si2	261.158	584.409	CC(C)[C@H](N)C(O)=O	InChI=1/C5H11NO2/c1-3(2)4(6)5(7)8/h3-4H,6H2,1-2H3,(H,7,8)/t4-/m0/s1/f/h7H
	91	Malic acid, 3TMS derivative	38166-11-9	C13H30O5Si3	350.14	859.249	OC(CC(O)=O)C(O)=O	InChI=1/C4H6O5/c5-2(4(8)9)1-3(6)7/h2,5H,1H2,(H,6,7)(H,8,9)/f/h6,8H
	92	Medroxyprogesterone, TMS derivative	69833-55-2	C25H40O3Si	416.275	1894.86	C[C@H]1C[C@@H]2[C@H](CC[C@@]3(C)[C@H]2CC[C@]3(O)C(C)=O)[C@@]4(C)CCC(=O)C=C14	InChI=1/C22H32O3/c1-13-11-16-17(20(3)8-5-15(24)12-19(13)20)6-9-21(4)18(16)7-10-22(21,25)14(2)23/h12-13,16-18,25H,5-11H2,1-4H3/t13-,16+,17-,18-,20+,21-,22-/m0/s1
	93	Myo-Inositol, 1,3,4,5,6-pentakis-O-(trimethylsilyl)-, bis(trimethylsilyl) phosphate	33910-06-4	C27H69O9PSi7	764.306	1564.16	C[Si](C)(C)OC1C(O[Si](C)(C)C)C(O[Si](C)(C)C)C(O[P](=O)(O[Si](C)(C)C)O[Si](C)(C)C)C(O[Si](C)(C)C)C1O[Si](C)(C)C	InChI=1/C27H69O9PSi7/c1-38(2,3)30-23-22(29-37(28,35-43(16,17)18)36-44(19,20)21)24(31-39(4,5)6)26(33-41(10,11)12)27(34-42(13,14)15)25(23)32-40(7,8)9/h22-27H,1-21H3
	94	Myo-Inositol, 6TMS derivative	2582-79-8	C24H60O6Si6	612.301	1349.24	OC1C(O)C(O)C(O)C(O)C1O	InChI=1/C6H12O6/c7-1-2(8)4(10)6(12)5(11)3(1)9/h1-12H
	95	Myristic acid, TMS derivative	18603-17-3	C17H36O2Si	300.248	1152.74	CCCCCCCCCCCCCC(O)=O	InChI=1/C14H28O2/c1-2-3-4-5-6-7-8-9-10-11-12-13-14(15)16/h2-13H2,1H3,(H,15,16)/f/h15H
	96	N-.alpha.-Acetyl-L-Lysine, 3TMS derivative	1000333-70-9	C17H40N2O3Si3	404.235	1161.64	CC(=O)NC(CCCCN)C(O)=O	InChI=1/C8H16N2O3/c1-6(11)10-7(8(12)13)4-2-3-5-9/h7H,2-5,9H2,1H3,(H,10,11)(H,12,13)/f/h10,12H
	97	N-[Tris(tert-butyldimethylsilyloxymethyl)methyl]-3-amino-2-(tert-butyldimethylsilyl)oxypropanesulfonic acid, tert-butyldimethylsilyl ester	1000366-70-9	C31H73NO6SSi4	699.424	1611.71	C[SiH](C)OC(C(C)(C)C)C(NCC(C[S](=O)(=O)O[Si](C)(C)C(C)(C)C)O[Si](C)(C)C(C)(C)C)(C(O[SiH](C)C)C(C)(C)C)C(O[SiH](C)C)C(C)(C)C	InChI=1/C37H87NO7SSi5/c1-32(2,3)29(41-47(16)17)37(30(33(4,5)6)42-48(18)19,31(34(7,8)9)43-49(20)21)38-26-28(44-50(22,23)35(10,11)12)27-46(39,40)45-51(24,25)36(13,14)15/h28-31,38,47-49H,26-27H2,1-25H3
	98	N-Methyldiethanolamine, 2TMS derivative	76710-52-6	C11H29NO2Si2	263.174	673.751	CN(CCO)CCO	InChI=1/C5H13NO2/c1-6(2-4-7)3-5-8/h7-8H,2-5H2,1H3
	99	Orthoacetic acid, trifluorotrithio-, ethylene cyclic diethylene ester	16526-38-8	C10H12F6S6	437.917	610.42	FC(F)(F)C1(SCCS1)SCCSC2(SCCS2)C(F)(F)F	InChI=1/C10H12F6S6/c11-7(12,13)9(17-1-2-18-9)21-5-6-22-10(8(14,15)16)19-3-4-20-10/h1-6H2
	100	Oxalic acid, 2TMS derivative	18294-04-7	C8H18O4Si2	234.074	502.995	OC(=O)C(O)=O	InChI=1/C2H2O4/c3-1(4)2(5)6/h(H,3,4)(H,5,6)/f/h3,5H
	101	Palmitic Acid, TMS derivative	55520-89-3	C19H40O2Si	328.28	1296.34	CCCCCCCCCCCCCCCC(O)=O	InChI=1/C16H32O2/c1-2-3-4-5-6-7-8-9-10-11-12-13-14-15-16(17)18/h2-15H2,1H3,(H,17,18)/f/h17H
	102	Pentanoic acid, 2-[(trimethylsilyl)oxy]-, trimethylsilyl ester	55887-46-2	C11H26O3Si2	262.142	529.746	CCCC(O[Si](C)(C)C)C(=O)O[Si](C)(C)C	InChI=1/C11H26O3Si2/c1-8-9-10(13-15(2,3)4)11(12)14-16(5,6)7/h10H,8-9H2,1-7H3
	103	Pentasiloxane, dodecamethyl-	141-63-9	C12H36O4Si5	384.146	542.213	C[Si](C)(C)O[Si](C)(C)O[Si](C)(C)O[Si](C)(C)O[Si](C)(C)C	InChI=1/C12H36O4Si5/c1-17(2,3)13-19(7,8)15-21(11,12)16-20(9,10)14-18(4,5)6/h1-12H3
	104	Phenylalanine, 2TMS derivative	2899-52-7	C15H27NO2Si2	309.158	980.44	N[C@@H](Cc1ccccc1)C(O)=O	InChI=1/C9H11NO2/c10-8(9(11)12)6-7-4-2-1-3-5-7/h1-5,8H,6,10H2,(H,11,12)/t8-/m0/s1/f/h11H
	105	Phosphine, tris[4-(trifluoromethyl)phenyl]-	13406-29-6	C21H12F9P	466.053	1685.19	FC(F)(F)c1ccc(cc1)P(c2ccc(cc2)C(F)(F)F)c3ccc(cc3)C(F)(F)F	InChI=1/C21H12F9P/c22-19(23,24)13-1-7-16(8-2-13)31(17-9-3-14(4-10-17)20(25,26)27)18-11-5-15(6-12-18)21(28,29)30/h1-12H
	106	Phthalic acid, 2TBDMS derivative	104256-00-0	C20H34O4Si2	394.2	1409.29	OC(=O)c1ccccc1C(O)=O	InChI=1/C8H6O4/c9-7(10)5-3-1-2-4-6(5)8(11)12/h1-4H,(H,9,10)(H,11,12)/f/h9,11H
	107	Propanoic acid, 2-(methoxyimino)-, trimethylsilyl ester	55493-92-0	C7H15NO3Si	189.082	403.983	CON=C(C)C(=O)O[Si](C)(C)C	InChI=1/C7H15NO3Si/c1-6(8-10-2)7(9)11-12(3,4)5/h1-5H3
	108	Propylamine, 2TMS derivative	7331-84-2	C9H25NSi2	203.153	637.334	CCCN	InChI=1/C3H9N/c1-2-3-4/h2-4H2,1H3
	109	Propylene glycol, 2TMS derivative	17887-27-3	C9H24O2Si2	220.131	351.537	CC(O)CO	InChI=1/C3H8O2/c1-3(5)2-4/h3-5H,2H2,1H3
	110	Prostaglandin A1, methyl ester, TMS derivative	1000368-68-7	C24H42O4Si	422.285	2003.2	CCCCCC(O)/C=C/C1C=CC(=O)C1CCCCCCC(=O)OC	InChI=1/C21H34O4/c1-3-4-7-10-18(22)15-13-17-14-16-20(23)19(17)11-8-5-6-9-12-21(24)25-2/h13-19,22H,3-12H2,1-2H3/b15-13+
	111	Pyridazine-4,6-dicarbonitrile, 2,3-dihydro-2-(4-bromophenyl)-5-methyl-3-oxo-	329762-50-7	C13H7BrN4O	313.98	901.502	CC1=C(C#N)C(=O)N(N=C1C#N)c2ccc(Br)cc2	InChI=1/C13H7BrN4O/c1-8-11(6-15)13(19)18(17-12(8)7-16)10-4-2-9(14)3-5-10/h2-5H,1H3
	112	Pyrido[2,3-d]pyrimidin-4(1H)-one	24410-19-3	C7H5N3O	147.043	620.036	O=C1N=CNc2ncccc12	InChI=1/C7H5N3O/c11-7-5-2-1-3-8-6(5)9-4-10-7/h1-4H,(H,8,9,10,11)/f/h9H
	113	Serine, 3TMS derivative	64625-17-8	C12H31NO3Si3	321.161	736.053	N[C@@H](CO)C(O)=O	InChI=1/C3H7NO3/c4-2(1-5)3(6)7/h2,5H,1,4H2,(H,6,7)/t2-/m0/s1/f/h6H
	114	Silanamine, N,N'-methanetetraylbis[1,1,1-trimethyl-	1000-70-0	C7H18N2Si2	186.101	311.517	C[Si](C)(C)N=C=N[Si](C)(C)C	InChI=1/C7H18N2Si2/c1-10(2,3)8-7-9-11(4,5)6/h1-6H3
	115	Silane, diethyl(2-ethoxyethyloxy)octadecyloxy-	1000363-52-8	C26H56O3Si	444.4	1266.72	CCOCCOCCCCCCCCCCCCCCCCCCO[SiH](CC)CC	InChI=1/C26H56O3Si/c1-4-27-25-26-28-23-21-19-17-15-13-11-9-7-8-10-12-14-16-18-20-22-24-29-30(5-2)6-3/h30H,4-26H2,1-3H3
	116	Silane, diethylpentadecyloxy(pentafluorobenzyloxy)-	1000363-23-0	C26H43F5O2Si	510.295	1519.12	CCCCCCCCCCCCCCCO[Si](CC)(CC)OC(F)(F)c1ccc(F)c(F)c1F	InChI=1/C26H43F5O2Si/c1-4-7-8-9-10-11-12-13-14-15-16-17-18-21-32-34(5-2,6-3)33-26(30,31)22-19-20-23(27)25(29)24(22)28/h19-20H,4-18,21H2,1-3H3
	117	Silane, dimethyldi(3-heptyloxy)-	1000347-71-5	C16H36O2Si	288.248	887.553	CCCCC(CC)O[Si](C)(C)OC(CC)CCCC	InChI=1/C16H36O2Si/c1-7-11-13-15(9-3)17-19(5,6)18-16(10-4)14-12-8-2/h15-16H,7-14H2,1-6H3
	118	Silane, dimethyldi(4-(2-phenylprop-2-yl)phenoxy)-	1000347-19-8	C32H36O2Si	480.248	1685.26	CC(C)(c1ccccc1)c2ccc(O[Si](C)(C)Oc3ccc(cc3)C(C)(C)c4ccccc4)cc2	InChI=1/C32H36O2Si/c1-31(2,25-13-9-7-10-14-25)27-17-21-29(22-18-27)33-35(5,6)34-30-23-19-28(20-24-30)32(3,4)26-15-11-8-12-16-26/h7-24H,1-6H3
	119	Silanol, trimethyl-, phosphate (3:1)	10497-05-9	C9H27O4PSi3	314.095	648.096	C[Si](C)(C)O.C[Si](C)(C)O.C[Si](C)(C)O.O[P](O)(O)=O	InChI=1/3C3H10OSi.H3O4P/c4*1-5(2,3)4/h3*4H,1-3H3;(H3,1,2,3,4)/f/h;;;1-3H
	120	Stearic acid, TMS derivative	18748-91-9	C21H44O2Si	356.311	1429.01	CCCCCCCCCCCCCCCCCC(O)=O	InChI=1/C18H36O2/c1-2-3-4-5-6-7-8-9-10-11-12-13-14-15-16-17-18(19)20/h2-17H2,1H3,(H,19,20)/f/h19H
	121	Sulfurous acid, 2-ethylhexyl undecyl ester	1000309-19-4	C19H40O3S	348.27	1040.88	CCCCCCCCCCCO[S](=O)OCC(CC)CCCC	InChI=1/C19H40O3S/c1-4-7-9-10-11-12-13-14-15-17-21-23(20)22-18-19(6-3)16-8-5-2/h19H,4-18H2,1-3H3
	122	Terephthalic acid, 4-bromophenyl butyl ester	1000323-67-9	C18H17BrO4	376.031	1306.58	CCCCOC(=O)c1ccc(cc1)C(=O)Oc2ccc(Br)cc2	InChI=1/C18H17BrO4/c1-2-3-12-22-17(20)13-4-6-14(7-5-13)18(21)23-16-10-8-15(19)9-11-16/h4-11H,2-3,12H2,1H3
	123	Tetracosane, 1-iodo-	1000406-32-0	C24H49I	464.288	1208.17	CCCCCCCCCCCCCCCCCCCCCCCCI	InChI=1/C24H49I/c1-2-3-4-5-6-7-8-9-10-11-12-13-14-15-16-17-18-19-20-21-22-23-24-25/h2-24H2,1H3
	124	Tetrasiloxane, decamethyl-	141-62-8	C10H30O3Si4	310.127	395.683	C[Si](C)(C)O[Si](C)(C)O[Si](C)(C)O[Si](C)(C)C	InChI=1/C10H30O3Si4/c1-14(2,3)11-16(7,8)13-17(9,10)12-15(4,5)6/h1-10H3
	125	Trifluoroacetamide, TMS derivative	55982-15-5	C5H10F3NOSi	185.048	306.756	NC(=O)C(F)(F)F	InChI=1/C2H2F3NO/c3-2(4,5)1(6)7/h(H2,6,7)/f/h6H2
	126	Tris(2,4-di-tert-butylphenyl) phosphate	95906-11-9	C42H63O4P	662.446	1837.12	CC(C)(C)c1ccc(O[P](=O)(Oc2ccc(cc2C(C)(C)C)C(C)(C)C)Oc3ccc(cc3C(C)(C)C)C(C)(C)C)c(c1)C(C)(C)C	InChI=1/C42H63O4P/c1-37(2,3)28-19-22-34(31(25-28)40(10,11)12)44-47(43,45-35-23-20-29(38(4,5)6)26-32(35)41(13,14)15)46-36-24-21-30(39(7,8)9)27-33(36)42(16,17)18/h19-27H,1-18H3
	127	Trisiloxane, octamethyl-	107-51-7	C8H24O2Si3	236.108	697.274	C[Si](C)(C)O[Si](C)(C)O[Si](C)(C)C	InChI=1/C8H24O2Si3/c1-11(2,3)9-13(7,8)10-12(4,5)6/h1-8H3
	128	Tromethamine, 4TMS derivative	136281-54-4	C16H43NO3Si4	409.232	884.419	NC(CO)(CO)CO	InChI=1/C4H11NO3/c5-4(1-6,2-7)3-8/h6-8H,1-3,5H2
	129	Undecane	1120-21-4	C11H24	156.188	560.01	CCCCCCCCCCC	InChI=1/C11H24/c1-3-5-7-9-11-10-8-6-4-2/h3-11H2,1-2H3
	130	Urea, 2TMS derivative	18297-63-7	C7H20N2OSi2	204.111	611.016	NC(N)=O	InChI=1/CH4N2O/c2-1(3)4/h(H4,2,3,4)/f/h2-3H2
liver	1	(R)-3-Hydroxybutyric acid, 2TMS derivative	1000332-95-8	C10H24O3Si2	248.126	523.79	C[C@@H](O)CC(O)=O	InChI=1/C4H8O3/c1-3(5)2-4(6)7/h3,5H,2H2,1H3,(H,6,7)/t3-/m1/s1/f/h6H
	2	(Z)-2,4'-Di(methoxymethoxy)-stilbene	1000148-70-5	C18H20O4	300.136	711.86	COCOc1ccc(cc1)\C=C/c2ccccc2OCOC	InChI=1/C18H20O4/c1-19-13-21-17-11-8-15(9-12-17)7-10-16-5-3-4-6-18(16)22-14-20-2/h3-12H,13-14H2,1-2H3/b10-7-
	3	.alpha.-D-Mannopyranose, 5TMS derivative	24707-99-1	C21H52O6Si5	540.261	1271.56	OC[C@H]1O[C@H](O)[C@@H](O)[C@@H](O)[C@@H]1O	InChI=1/C6H12O6/c7-1-2-3(8)4(9)5(10)6(11)12-2/h2-11H,1H2/t2-,3-,4+,5+,6+/m1/s1
	4	.alpha.-l-Galactofuranoside, methyl 6-deoxy-2,3,5-tris-O-(trimethylsilyl)-	56227-31-7	C16H38O5Si3	394.203	1060.6	COC1OC(C(C)O[Si](C)(C)C)C(O[Si](C)(C)C)C1O[Si](C)(C)C	InChI=1/C16H38O5Si3/c1-12(19-22(3,4)5)13-14(20-23(6,7)8)15(16(17-2)18-13)21-24(9,10)11/h12-16H,1-11H3
	5	1,2-Ethanediamine, 1,2-bis(4-bromophenyl)-N,N,N',N'-tetraethyl-, (R*,S*)-	115877-16-2	C22H30Br2N2	480.078	562.981	CCN(CC)[C@H]([C@H](N(CC)CC)c1ccc(Br)cc1)c2ccc(Br)cc2	InChI=1/C22H30Br2N2/c1-5-25(6-2)21(17-9-13-19(23)14-10-17)22(26(7-3)8-4)18-11-15-20(24)16-12-18/h9-16,21-22H,5-8H2,1-4H3/t21-,22+
	6	1,3-Dipentyl-heptabarbital	1000100-95-1	C23H38N2O3	390.288	1964.63	CCCCCN1C(=O)N(CCCCC)C(=O)C(CC)(C1=O)C2=CCCCCC2	InChI=1/C23H38N2O3/c1-4-7-13-17-24-20(26)23(6-3,19-15-11-9-10-12-16-19)21(27)25(22(24)28)18-14-8-5-2/h15H,4-14,16-18H2,1-3H3
	7	1-Cyano-4-diphenyl(tert-butyl)silyloxybenzene	1000307-86-7	C23H23NOSi	357.155	683.457	CC(C)(C)[Si](Oc1ccc(cc1)C#N)(c2ccccc2)c3ccccc3	InChI=1/C23H23NOSi/c1-23(2,3)26(21-10-6-4-7-11-21,22-12-8-5-9-13-22)25-20-16-14-19(18-24)15-17-20/h4-17H,1-3H3
	8	1-Cyclohexyldimethylsilyloxyoctadecane	1000281-96-8	C26H54OSi	410.394	1371.94	CCCCCCCCCCCCCCCCCC(O[SiH](C)C)C1CCCCC1	InChI=1/C26H54OSi/c1-4-5-6-7-8-9-10-11-12-13-14-15-16-17-21-24-26(27-28(2)3)25-22-19-18-20-23-25/h25-26,28H,4-24H2,1-3H3
	9	1H-1,2,3-Triazole, 4-methyl-5-(5-methyl-1H-pyrazol-3-yl)-	51719-86-9	C7H9N5	163.086	617.57	Cc1[nH]nc(c1)c2[nH]nnc2C	InChI=1/C7H9N5/c1-4-3-6(10-8-4)7-5(2)9-12-11-7/h3H,1-2H3,(H,8,10)(H,9,11,12)/f/h8,11H
	10	1H-Indol-2-one, 2,3-dihydro-1-acetyl-3-(5-methylthio-2-furfurylidene)-	64259-23-0	C16H13NO3S	299.062	693.475	CSc1oc(cc1)\C=C2/C(=O)N(C(C)=O)c3ccccc23	InChI=1/C16H13NO3S/c1-10(18)17-14-6-4-3-5-12(14)13(16(17)19)9-11-7-8-15(20-11)21-2/h3-9H,1-2H3/b13-9-
	11	1-Monopalmitin, 2TMS derivative	1188-74-5	C25H54O4Si2	474.356	1642.37	CCCCCCCCCCCCCCCC(=O)OCC(O)CO	InChI=1/C19H38O4/c1-2-3-4-5-6-7-8-9-10-11-12-13-14-15-19(22)23-17-18(21)16-20/h18,20-21H,2-17H2,1H3
	12	2(1H)-Pyridinone, 3-acetyl-4-hydroxy-6-methyl-	5501-39-3	C8H9NO3	167.058	494.642	CC(=O)C1=C(O)C=C(C)NC1=O	InChI=1/C8H9NO3/c1-4-3-6(11)7(5(2)10)8(12)9-4/h3H,1-2H3,(H2,9,11,12)/f/h9,11H
	13	2-(4'-Methoxyphenyl)-2-(3'-methyl-4'methoxyphenyl)propane	1000283-53-6	C18H22O2	270.162	740.643	COc1ccc(cc1)C(C)(C)c2ccc(OC)c(C)c2	InChI=1/C18H22O2/c1-13-12-15(8-11-17(13)20-5)18(2,3)14-6-9-16(19-4)10-7-14/h6-12H,1-5H3
	14	2,3-Diaminopropanoic acid, 3TMS derivative	55124-76-0	C12H32N2O2Si3	320.177	930.5	NCC(N)C(O)=O	InChI=1/C3H8N2O2/c4-1-2(5)3(6)7/h2H,1,4-5H2,(H,6,7)/f/h6H
	15	2,4-Quinolinediamine, 6,7-dimethoxy-N(2),N(2)-diphenyl-	1000318-94-3	C23H21N3O2	371.163	1646.8	COc1cc2nc(cc(N)c2cc1OC)N(c3ccccc3)c4ccccc4	InChI=1/C23H21N3O2/c1-27-21-13-18-19(24)14-23(25-20(18)15-22(21)28-2)26(16-9-5-3-6-10-16)17-11-7-4-8-12-17/h3-15H,1-2H3,(H2,24,25)/f/h24H2
	16	2-.alpha.-Mannobiose, octakis(trimethylsilyl) ether, methyloxime (isomer 1)	1000380-10-7	C37H89NO11Si8	947.459	1783.8
	17	2-Amino1-(4-hydroxyphenyl)-5-phenyl-1H-pyrrole-3,4-dicarbonitrile	1000327-07-1	C18H12N4O	300.101	718.434	Nc1n(c2ccc(O)cc2)c(c3ccccc3)c(C#N)c1C#N	InChI=1/C18H12N4O/c19-10-15-16(11-20)18(21)22(13-6-8-14(23)9-7-13)17(15)12-4-2-1-3-5-12/h1-9,23H,21H2
	18	2-Amino-4,6-dihydroxypyrimidine, 3TMS derivative	1000352-44-9	C13H29N3O2Si3	343.157	1363.63	Nc1nc(O)cc(O)n1	InChI=1/C4H5N3O2/c5-4-6-2(8)1-3(9)7-4/h1H,(H4,5,6,7,8,9)/f/h8-9H,5H2
	19	2-Chloroethylamine	689-98-5	C2H6ClN	79.019	357.434	NCCCl	InChI=1/C2H6ClN/c3-1-2-4/h1-2,4H2
	20	2H,8H-Benzo[1,2-b:5,4-b']dipyran-10-propanoic acid, 5-methoxy-2,2,8,8-tetramethyl-	26535-35-3	C20H24O5	344.162	1363.4	COc1c2C=CC(C)(C)Oc2c(CCC(O)=O)c3OC(C)(C)C=Cc13	InChI=1/C20H24O5/c1-19(2)10-8-13-16(23-5)14-9-11-20(3,4)25-18(14)12(17(13)24-19)6-7-15(21)22/h8-11H,6-7H2,1-5H3,(H,21,22)/f/h21H
	21	2-Oxo-5-benzyl-4,6-diphenyl-1,2-dihydropyrimidine	28840-59-7	C23H18N2O	338.142	1410.74	O=C1NC(=C(Cc2ccccc2)C(=N1)c3ccccc3)c4ccccc4	InChI=1/C23H18N2O/c26-23-24-21(18-12-6-2-7-13-18)20(16-17-10-4-1-5-11-17)22(25-23)19-14-8-3-9-15-19/h1-15H,16H2,(H,24,25,26)/f/h24H
	22	2-Propen-1-one, 1-(2-hydroxy-3,4,6-trimethoxyphenyl)-3-phenyl-	6971-20-6	C18H18O5	314.115	657.299	COc1cc(OC)c(c(O)c1OC)C(=O)C=Cc2ccccc2	InChI=1/C18H18O5/c1-21-14-11-15(22-2)18(23-3)17(20)16(14)13(19)10-9-12-7-5-4-6-8-12/h4-11,20H,1-3H3
	23	3-Ethoxy-4-hydroxymandelic acid, 3TMS derivative	1000292-73-1	C19H36O5Si3	428.187	1995.72	CCOc1cc(ccc1O)C(O)C(O)=O	InChI=1/C10H12O5/c1-2-15-8-5-6(3-4-7(8)11)9(12)10(13)14/h3-5,9,11-12H,2H2,1H3,(H,13,14)/f/h13H
	24	3-Hydroxy-7-methoxy-2-naphthoic acid	143355-56-0	C12H10O4	218.058	1226.16	COc1ccc2cc(O)c(cc2c1)C(O)=O	InChI=1/C12H10O4/c1-16-9-3-2-7-6-11(13)10(12(14)15)5-8(7)4-9/h2-6,13H,1H3,(H,14,15)/f/h14H
	25	3-Pyridinol, TMS derivative	41571-88-4	C8H13NOSi	167.077	387.472	Oc1cccnc1	InChI=1/C5H5NO/c7-5-2-1-3-6-4-5/h1-4,7H
	26	3-Trifluoromethylbenzylamine, N,N-diundecyl	1000310-29-9	C30H52F3N	483.405	1430.25	CCCCCCCCCCCN(CCCCCCCCCCC)Cc1cccc(c1)C(F)(F)F	InChI=1/C30H52F3N/c1-3-5-7-9-11-13-15-17-19-24-34(25-20-18-16-14-12-10-8-6-4-2)27-28-22-21-23-29(26-28)30(31,32)33/h21-23,26H,3-20,24-25,27H2,1-2H3
	27	4-Amino-2-methyl-5,6-trimethylenepyrimidine	76881-49-7	C8H11N3	149.095	417.021	Cc1nc(N)c2CCCc2n1	InChI=1/C8H11N3/c1-5-10-7-4-2-3-6(7)8(9)11-5/h2-4H2,1H3,(H2,9,10,11)/f/h9H2
	28	4H-Benzo[b]pyrane-3-carbonitrile, 5,6,7,8-tetrahydro-2-amino-4-(3-cyclohexenyl)-7,7-dimethyl-5-oxo-	275360-55-9	C18H22N2O2	298.168	1769.38	CC1(C)CC(=O)C2=C(C1)OC(=C(C#N)C2C3CCC=CC3)N	InChI=1/C18H22N2O2/c1-18(2)8-13(21)16-14(9-18)22-17(20)12(10-19)15(16)11-6-4-3-5-7-11/h3-4,11,15H,5-9,20H2,1-2H3
	29	4-Methylthio-N-phenyl-1,2-carbazoledicarboximide	22359-21-3	C21H14N2O2S	358.078	1575.42	CSc1cc2C(=O)N(C(=O)c2c3[nH]c4ccccc4c13)c5ccccc5	InChI=1/C21H14N2O2S/c1-26-16-11-14-18(19-17(16)13-9-5-6-10-15(13)22-19)21(25)23(20(14)24)12-7-3-2-4-8-12/h2-11,22H,1H3
	30	9,12-Octadecadienoic acid (Z,Z)-, TMS derivative	56259-07-5	C21H40O2Si	352.28	1409.64	CCCCC/C=C/C/C=C/CCCCCCCC(O)=O	InChI=1/C18H32O2/c1-2-3-4-5-6-7-8-9-10-11-12-13-14-15-16-17-18(19)20/h6-7,9-10H,2-5,8,11-17H2,1H3,(H,19,20)/b7-6+,10-9+/f/h19H
	31	9-Hexadecenoic acid, (Z)-, TMS derivative	1000333-19-8	C19H38O2Si	326.264	1282.29	CCCCCC\C=C/CCCCCCCC(O)=O	InChI=1/C16H30O2/c1-2-3-4-5-6-7-8-9-10-11-12-13-14-15-16(17)18/h7-8H,2-6,9-15H2,1H3,(H,17,18)/b8-7-/f/h17H
	32	9-Octadecenoic acid, (E)-, TMS derivative	96851-47-7	C21H42O2Si	354.295	1413.63	CCCCCCCC/C=C/CCCCCCCC(O)=O	InChI=1/C18H34O2/c1-2-3-4-5-6-7-8-9-10-11-12-13-14-15-16-17-18(19)20/h9-10H,2-8,11-17H2,1H3,(H,19,20)/b10-9+/f/h19H
	33	Adonitol, 5TMS derivative	35-22-3	C20H52O5Si5	512.266	1074.92	OCC(O)C(O)C(O)CO	InChI=1/C5H12O5/c6-1-3(8)5(10)4(9)2-7/h3-10H,1-2H2
	34	Alanine, N,N-dimethyl-3-phenyl-, ethyl ester	15504-42-4	C13H19NO2	221.142	609.681	CCOC(=O)[C@H](Cc1ccccc1)N(C)C	InChI=1/C13H19NO2/c1-4-16-13(15)12(14(2)3)10-11-8-6-5-7-9-11/h5-9,12H,4,10H2,1-3H3/t12-/m0/s1
	35	Aminomalonic acid, tris(trimethylsilyl)-	1000079-52-5	C12H29NO4Si3	335.14	842.31	C[Si](C)(C)OC(=O)C(N)(C(=O)O[Si](C)(C)C)[Si](C)(C)C	InChI=1/C12H29NO4Si3/c1-18(2,3)12(13,10(14)16-19(4,5)6)11(15)17-20(7,8)9/h13H2,1-9H3
	36	Apazone	13539-59-8	C16H20N4O2	300.159	770.076	CCCC1C(=O)N2N(C1=O)C(=Nc3ccc(C)cc23)N(C)C	InChI=1/C16H20N4O2/c1-5-6-11-14(21)19-13-9-10(2)7-8-12(13)17-16(18(3)4)20(19)15(11)22/h7-9,11H,5-6H2,1-4H3
	37	Arachidonic acid, TMS derivative	113516-18-0	C23H40O2Si	376.28	1510.7	CCCCC/C=C\C\C=C/C/C=C\C\C=C/CCCC(O)=O	InChI=1/C20H32O2/c1-2-3-4-5-6-7-8-9-10-11-12-13-14-15-16-17-18-19-20(21)22/h6-7,9-10,12-13,15-16H,2-5,8,11,14,17-19H2,1H3,(H,21,22)/b7-6-,10-9-,13-12-,16-15-/f/h21H
	38	Benzamide, N-(5,6,7,8-tetrahydro-3-cyano-4H-cyclohepta[b]thien-2-yl)-3-(1,1,2,2-terafluoroethoxy)-	309920-93-2	C19H16F4N2O2S	412.087	698.147	FC(F)C(F)(F)Oc1cccc(c1)C(=O)Nc2sc3CCCCCc3c2C#N	InChI=1/C19H16F4N2O2S/c20-18(21)19(22,23)27-12-6-4-5-11(9-12)16(26)25-17-14(10-24)13-7-2-1-3-8-15(13)28-17/h4-6,9,18H,1-3,7-8H2,(H,25,26)/f/h25H
	39	Benzene, 1,2,4-trimethyl-	95-63-6	C9H12	120.094	376.49	Cc1ccc(C)c(C)c1	InChI=1/C9H12/c1-7-4-5-8(2)9(3)6-7/h4-6H,1-3H3
	40	Benzene, 1,4-diethyl-	105-05-5	C10H14	134.11	442.531	CCc1ccc(CC)cc1	InChI=1/C10H14/c1-3-9-5-7-10(4-2)8-6-9/h5-8H,3-4H2,1-2H3
	41	Benzene, 1-ethyl-2-methyl-	611-14-3	C9H12	120.094	313.281	CCc1ccccc1C	InChI=1/C9H12/c1-3-9-7-5-4-6-8(9)2/h4-7H,3H2,1-2H3
	42	Benzoic acid, 4-(trimethylsilyl)-	15290-29-6	C10H14O2Si	194.076	855.489	C[Si](C)(C)c1ccc(cc1)C(O)=O	InChI=1/C10H14O2Si/c1-13(2,3)9-6-4-8(5-7-9)10(11)12/h4-7H,1-3H3,(H,11,12)/f/h11H
	43	Benzoic amide, 3,5-di-t-butyl-4-methoxy-N-methyl-	1000130-28-2	C17H27NO2	277.204	904.429	CNC(=O)c1cc(c(OC)c(c1)C(C)(C)C)C(C)(C)C	InChI=1/C17H27NO2/c1-16(2,3)12-9-11(15(19)18-7)10-13(14(12)20-8)17(4,5)6/h9-10H,1-8H3,(H,18,19)/f/h18H
	44	Bisphenol A monomethyl ether, TMS derivative	1000283-55-5	C19H26O2Si	314.17	701.282	COC.CC(C)(c1ccc(O)cc1)c2ccc(O)cc2	InChI=1/C15H16O2.C2H6O/c1-15(2,11-3-7-13(16)8-4-11)12-5-9-14(17)10-6-12;1-3-2/h3-10,16-17H,1-2H3;1-2H3
	45	Bisphenol A, 2TMS derivative	4387-16-0	C21H32O2Si2	372.194	1420.81	CC(C)(c1ccc(O)cc1)c2ccc(O)cc2	InChI=1/C15H16O2/c1-15(2,11-3-7-13(16)8-4-11)12-5-9-14(17)10-6-12/h3-10,16-17H,1-2H3
	46	Butanedioic acid, 2TMS derivative	40309-57-7	C10H22O4Si2	262.106	683.226	OC(=O)CCC(O)=O	InChI=1/C4H6O4/c5-3(6)1-2-4(7)8/h1-2H2,(H,5,6)(H,7,8)/f/h5,7H
	47	Butanoic acid, .alpha.-[(2-methoxy-1,2-dioxoethyl)hydrazono]-	1000142-78-0	C7H10N2O5	202.059	886.552	CCC(=NNC(=O)C(=O)OC)C(O)=O	InChI=1/C7H10N2O5/c1-3-4(6(11)12)8-9-5(10)7(13)14-2/h3H2,1-2H3,(H,9,10)(H,11,12)/f/h9,11H
	48	Carbonic acid, neopentyl pentafluorobenzyl ester	1000331-43-3	C13H13F5O3	312.078	672.4	CC(C)(C)COC(=O)OC(F)(F)c1ccc(F)c(F)c1F	InChI=1/C13H13F5O3/c1-12(2,3)6-20-11(19)21-13(17,18)7-4-5-8(14)10(16)9(7)15/h4-5H,6H2,1-3H3
	49	Cholesterol, TMS derivative	1856-05-9	C30H54OSi	458.394	1950.37	CC(C)CCC[C@@H](C)[C@H]1CC[C@H]2[C@@H]3CC=C4C[C@@H](O)CC[C@]4(C)[C@H]3CC[C@]12C	InChI=1/C27H46O/c1-18(2)7-6-8-19(3)23-11-12-24-22-10-9-20-17-21(28)13-15-26(20,4)25(22)14-16-27(23,24)5/h9,18-19,21-25,28H,6-8,10-17H2,1-5H3/t19-,21+,22+,23-,24+,25+,26+,27-/m1/s1
	50	Coronene	191-07-1	C24H12	300.094	650.78	c1cc2ccc3ccc4ccc5ccc6ccc1c7c2c3c4c5c67	InChI=1/C24H12/c1-2-14-5-6-16-9-11-18-12-10-17-8-7-15-4-3-13(1)19-20(14)22(16)24(18)23(17)21(15)19/h1-12H
	51	Cyclohexanone, O-methyloxime	13858-85-0	C7H13NO	127.1	346.805	CON=C1CCCCC1	InChI=1/C7H13NO/c1-9-8-7-5-3-2-4-6-7/h2-6H2,1H3
	52	D-(+)-Cellobiose, octakis(trimethylsilyl) ether, methyloxime (isomer 1)	1000380-10-0	C37H89NO11Si8	947.459	1756.24
	53	D-(+)-Turanose, octakis(trimethylsilyl) ether	1000380-08-4	C36H86O11Si8	918.432	1253
	54	D-Allose, oxime (isomer 1), 6TMS derivative	1000380-40-9	C24H61NO6Si6	627.311	1204.11
	55	Decane, 3,8-dimethyl-	17312-55-9	C12H26	170.203	1239.26	CCC(C)CCCCC(C)CC	InChI=1/C12H26/c1-5-11(3)9-7-8-10-12(4)6-2/h11-12H,5-10H2,1-4H3
	56	Decane, 5-ethyl-5-methyl-	17312-74-2	C13H28	184.219	854.428	CCCCCC(C)(CC)CCCC	InChI=1/C13H28/c1-5-8-10-12-13(4,7-3)11-9-6-2/h5-12H2,1-4H3
	57	d-Glucose, 2,3,4,5,6-pentakis-O-(trimethylsilyl)-, o-methyloxyme, (1E)-	130405-10-6	C22H55NO6Si5	569.288	1215.23	CO\N=C\C(O[Si](C)(C)C)C(O[Si](C)(C)C)C(O[Si](C)(C)C)C(CO[Si](C)(C)C)O[Si](C)(C)C	InChI=1/C22H55NO6Si5/c1-24-23-17-19(26-31(5,6)7)21(28-33(11,12)13)22(29-34(14,15)16)20(27-32(8,9)10)18-25-30(2,3)4/h17,19-22H,18H2,1-16H3/b23-17+
	58	d-Glucose, 2,3,4,5,6-pentakis-O-(trimethylsilyl)-, o-methyloxyme, (1Z)-	128705-73-7	C22H55NO6Si5	569.288	1175.62	CO\N=C/C(O[Si](C)(C)C)C(O[Si](C)(C)C)C(O[Si](C)(C)C)C(CO[Si](C)(C)C)O[Si](C)(C)C	InChI=1/C22H55NO6Si5/c1-24-23-17-19(26-31(5,6)7)21(28-33(11,12)13)22(29-34(14,15)16)20(27-32(8,9)10)18-25-30(2,3)4/h17,19-22H,18H2,1-16H3/b23-17-
	59	d-Glucose, 4-O-[6-deoxy-2,3,4-tris-O-(trimethylsilyl)-.alpha.-l-mannopyranosyl]-2,3,5,6-tetrakis-O-(trimethylsilyl)-	56784-12-4	C33H78O10Si7	830.398	1206.64	CC1OC(OC(C(CO[Si](C)(C)C)O[Si](C)(C)C)C(O[Si](C)(C)C)C(O[Si](C)(C)C)C=O)C(O[Si](C)(C)C)C(O[Si](C)(C)C)C1O[Si](C)(C)C	InChI=1/C33H78O10Si7/c1-25-28(40-47(11,12)13)31(42-49(17,18)19)32(43-50(20,21)22)33(36-25)37-29(27(39-46(8,9)10)24-35-44(2,3)4)30(41-48(14,15)16)26(23-34)38-45(5,6)7/h23,25-33H,24H2,1-22H3
	60	d-Leucyl-l-leucine	38689-31-5	C12H24N2O3	244.179	516.472	CC(C)C[C@@H](N)C(=O)N[C@@H](CC(C)C)C(O)=O	InChI=1/C12H24N2O3/c1-7(2)5-9(13)11(15)14-10(12(16)17)6-8(3)4/h7-10H,5-6,13H2,1-4H3,(H,14,15)(H,16,17)/t9-,10+/m1/s1/f/h14,16H
	61	DL-Phenylalanine, TMS derivative	2899-42-5	C12H19NO2Si	237.119	907.407	NC(Cc1ccccc1)C(O)=O	InChI=1/C9H11NO2/c10-8(9(11)12)6-7-4-2-1-3-5-7/h1-5,8H,6,10H2,(H,11,12)/f/h11H
	62	D-Mannitol, 6TMS derivative	14317-07-8	C24H62O6Si6	614.316	1242.6	OC[C@@H](O)[C@@H](O)[C@H](O)[C@H](O)CO	InChI=1/C6H14O6/c7-1-3(9)5(11)6(12)4(10)2-8/h3-12H,1-2H2/t3-,4-,5-,6-/m1/s1
	63	D-Myo-Inositol, 1,2,4,5,6-pentakis-O-(trimethylsilyl)-, bis(trimethylsilyl) phosphate	55568-91-7	C27H69O9PSi7	764.306	1564.62	C[Si](C)(C)OC1C(O[Si](C)(C)C)C(O[Si](C)(C)C)C(O[P](=O)(O[Si](C)(C)C)O[Si](C)(C)C)C(O[Si](C)(C)C)C1O[Si](C)(C)C	InChI=1/C27H69O9PSi7/c1-38(2,3)30-23-22(29-37(28,35-43(16,17)18)36-44(19,20)21)24(31-39(4,5)6)26(33-41(10,11)12)27(34-42(13,14)15)25(23)32-40(7,8)9/h22-27H,1-21H3
	64	Dodecane	112-40-3	C12H26	170.203	560.188	CCCCCCCCCCCC	InChI=1/C12H26/c1-3-5-7-9-11-12-10-8-6-4-2/h3-12H2,1-2H3
	65	d-Ribose, 2,3,4,5-tetrakis-O-(trimethylsilyl)-, O-methyloxime	56196-08-8	C18H45NO5Si4	467.237	1035.61	CO/N=C/C(O[Si](C)(C)C)C(O[Si](C)(C)C)C(CO[Si](C)(C)C)O[Si](C)(C)C	InChI=1/C18H45NO5Si4/c1-20-19-14-16(22-26(5,6)7)18(24-28(11,12)13)17(23-27(8,9)10)15-21-25(2,3)4/h14,16-18H,15H2,1-13H3/b19-14+
	66	Erythrono-1,4-lactone, (E)-, 2TMS derivative	55220-79-6	C10H22O4Si2	262.106	793.007
	67	Estra-1,3,5(10)-trien-6-one, 3,17-bis(acetyloxy)-2-methoxy-, (17.beta.)-	69540-62-1	C23H28O6	400.189	1718.89	COc1cc2[C@H]3CC[C@]4(C)[C@H](CC[C@H]4[C@@H]3CC(=O)c2cc1OC(C)=O)OC(C)=O	InChI=1/C23H28O6/c1-12(24)28-21-11-17-15(10-20(21)27-4)14-7-8-23(3)18(16(14)9-19(17)26)5-6-22(23)29-13(2)25/h10-11,14,16,18,22H,5-9H2,1-4H3/t14-,16-,18+,22+,23+/m1/s1
	68	Ethyl diazoacetate	623-73-4	C4H6N2O2	114.043	347.269	CCOC(=O)C=[N+]=[N-]	InChI=1/C4H6N2O2/c1-2-8-4(7)3-6-5/h3H,2H2,1H3
	69	Ethylene glycol, 2TMS derivative	7381-30-8	C8H22O2Si2	206.116	334.997	OCCO	InChI=1/C2H6O2/c3-1-2-4/h3-4H,1-2H2
	70	Galactose oxime, 6TMS derivative	120850-88-6	C24H61NO6Si6	627.311	1387.46	OC[C@@H](O)[C@H](O)[C@H](O)[C@@H](O)C=NO	InChI=1/C6H13NO6/c8-2-4(10)6(12)5(11)3(9)1-7-13/h1,3-6,8-13H,2H2/t3-,4+,5+,6-/m0/s1
	71	Gluconolactone, 4TMS derivative	1000141-48-9	C18H42O6Si4	466.206	1263.46	OC[C@H]1OC(=O)[C@H](O)[C@@H](O)[C@@H]1O	InChI=1/C6H10O6/c7-1-2-3(8)4(9)5(10)6(11)12-2/h2-5,7-10H,1H2/t2-,3-,4+,5-/m1/s1
	72	Glucose oxime, 6TMS derivative	120850-89-7	C24H61NO6Si6	627.311	1383.82	OC[C@@H](O)[C@@H](O)[C@H](O)[C@@H](O)C=NO	InChI=1/C6H13NO6/c8-2-4(10)6(12)5(11)3(9)1-7-13/h1,3-6,8-13H,2H2/t3-,4+,5+,6+/m0/s1
	73	Glycerol monostearate, 2TMS derivative	1188-75-6	C27H58O4Si2	502.387	1748.08	CCCCCCCCCCCCCCCCCC(O)=O.OCC(O)CO	InChI=1/C18H36O2.C3H8O3/c1-2-3-4-5-6-7-8-9-10-11-12-13-14-15-16-17-18(19)20;4-1-3(6)2-5/h2-17H2,1H3,(H,19,20);3-6H,1-2H2/f/h19H;
	74	Glycerol, 3TMS derivative	6787-10-06	C12H32O3Si3	308.166	648.812	OCC(O)CO	InChI=1/C3H8O3/c4-1-3(6)2-5/h3-6H,1-2H2
	75	Glycolic acid, TMS derivative	1000366-85-0	C5H12O3Si	148.056	648.496	OCC(O)=O	InChI=1/C2H4O3/c3-1-2(4)5/h3H,1H2,(H,4,5)/f/h4H
	76	Heptadecanoic acid, TMS derivative	55517-58-3	C20H42O2Si	342.295	1364.34	CCCCCCCCCCCCCCCCC(O)=O	InChI=1/C17H34O2/c1-2-3-4-5-6-7-8-9-10-11-12-13-14-15-16-17(18)19/h2-16H2,1H3,(H,18,19)/f/h18H
	77	Heptane, 5-ethyl-2-methyl-	13475-78-0	C10H22	142.172	371.058	CCC(CC)CCC(C)C	InChI=1/C10H22/c1-5-10(6-2)8-7-9(3)4/h9-10H,5-8H2,1-4H3
	78	Hexadecane	544-76-3	C16H34	226.266	643.999	CCCCCCCCCCCCCCCC	InChI=1/C16H34/c1-3-5-7-9-11-13-15-16-14-12-10-8-6-4-2/h3-16H2,1-2H3
	79	Hydrazinecarboxamide, 2-(1-phenylethylidene)-	2492-30-0	C9H11N3O	177.09	1961.98	CC(=NNC(N)=O)c1ccccc1	InChI=1/C9H11N3O/c1-7(11-12-9(10)13)8-5-3-2-4-6-8/h2-6H,1H3,(H3,10,12,13)/f/h12H,10H2
	80	Hydroxymethyltryptamine	57383-99-0	C11H14N2O	190.111	454.771	OCNCCc1c[nH]c2ccccc12	InChI=1/C11H14N2O/c14-8-12-6-5-9-7-13-11-4-2-1-3-10(9)11/h1-4,7,12-14H,5-6,8H2
	81	Imidazo(1,5-a)pyrimidine	274-67-9	C6H5N3	119.048	403.557	c1cnc2cncn2c1	InChI=1/C6H5N3/c1-2-8-6-4-7-5-9(6)3-1/h1-5H
	82	Indolizine, 8-methyl-	31108-58-4	C9H9N	131.073	420.823	Cc1cccn2cccc12	InChI=1/C9H9N/c1-8-4-2-6-10-7-3-5-9(8)10/h2-7H,1H3
	83	Isonipecotic acid, N-(4-ethylbenzoyl)-, propyl ester	1000361-13-8	C18H25NO3	303.183	646.326	CCCOC(=O)C1CCN(CC1)C(=O)c2ccc(CC)cc2	InChI=1/C18H25NO3/c1-3-13-22-18(21)16-9-11-19(12-10-16)17(20)15-7-5-14(4-2)6-8-15/h5-8,16H,3-4,9-13H2,1-2H3
	84	L-(-)-Arabitol, 5TMS derivative	35-21-2	C20H52O5Si5	512.266	1193.21	OCC(O)C(O)C(O)CO	InChI=1/C5H12O5/c6-1-3(8)5(10)4(9)2-7/h3-10H,1-2H2
	85	L-5-Oxoproline, , 2TMS derivative	30274-77-2	C11H23NO3Si2	273.122	887.096
	86	Lactic Acid, 2TMS derivative	17596-96-2	C9H22O3Si2	234.111	417.283	CC(O)C(O)=O	InChI=1/C3H6O3/c1-2(4)3(5)6/h2,4H,1H3,(H,5,6)/f/h5H
	87	L-Alanine, 2TMS derivative	27844-07-1	C9H23NO2Si2	233.127	461.774	C[C@H](N)C(O)=O	InChI=1/C3H7NO2/c1-2(4)3(5)6/h2H,4H2,1H3,(H,5,6)/t2-/m0/s1/f/h5H
	88	L-Isoleucine, TBDMS derivative	1000333-27-2	C12H27NO2Si	245.181	540.006	CC[C@H](C)[C@H](N)C(O)=O	InChI=1/C6H13NO2/c1-3-4(2)5(7)6(8)9/h4-5H,3,7H2,1-2H3,(H,8,9)/t4-,5-/m0/s1/f/h8H
	89	l-Proline, n-pentafluoropropionyl-, nonyl ester	1000321-07-0	C17H26F5NO3	387.183	1966.91
	90	L-Proline, TMS derivative	1000333-26-2	C8H17NO2Si	187.103	381.132	OC(=O)[C@@H]1CCCN1	InChI=1/C5H9NO2/c7-5(8)4-2-1-3-6-4/h4,6H,1-3H2,(H,7,8)/t4-/m0/s1/f/h7H
	91	l-Valine, N-methoxycarbonyl-, pentyl ester	1000313-83-6	C12H23NO4	245.163	416.367	CCCCCOC(=O)[C@@H](NC(=O)OC)C(C)C	InChI=1/C12H23NO4/c1-5-6-7-8-17-11(14)10(9(2)3)13-12(15)16-4/h9-10H,5-8H2,1-4H3,(H,13,15)/t10-/m0/s1/f/h13H
	92	Malic acid, 3TMS derivative	38166-11-9	C13H30O5Si3	350.14	859.346	OC(CC(O)=O)C(O)=O	InChI=1/C4H6O5/c5-2(4(8)9)1-3(6)7/h2,5H,1H2,(H,6,7)(H,8,9)/f/h6,8H
	93	Mesitylene	108-67-8	C9H12	120.094	346.048	Cc1cc(C)cc(C)c1	InChI=1/C9H12/c1-7-4-8(2)6-9(3)5-7/h4-6H,1-3H3
	94	Methyltris(trimethylsiloxy)silane	17928-28-8	C10H30O3Si4	310.127	396.019	C[Si](C)(C)O[Si](C)(O[Si](C)(C)C)O[Si](C)(C)C	InChI=1/C10H30O3Si4/c1-14(2,3)11-17(10,12-15(4,5)6)13-16(7,8)9/h1-10H3
	95	N-Acetyl-D-glucosamine, tetrakis(trimethylsilyl) ether, methyloxime (syn)	1000380-19-3	C21H50N2O6Si4	538.275	1343.03
	96	Neo-Inositol, 6TMS derivative	29307-70-8	C24H60O6Si6	612.301	1349.8	OC1C(O)C(O)C(O)C(O)C1O	InChI=1/C6H12O6/c7-1-2(8)4(10)6(12)5(11)3(1)9/h1-12H
	97	Nonane, 4,5-dimethyl-	17302-23-7	C11H24	156.188	408.427	CCCCC(C)C(C)CCC	InChI=1/C11H24/c1-5-7-9-11(4)10(3)8-6-2/h10-11H,5-9H2,1-4H3
	98	Octane, 2,3,6,7-tetramethyl-	52670-34-5	C12H26	170.203	414.479	CC(C)C(C)CCC(C)C(C)C	InChI=1/C12H26/c1-9(2)11(5)7-8-12(6)10(3)4/h9-12H,7-8H2,1-6H3
	99	Octane, 6-ethyl-2-methyl-	62016-19-7	C11H24	156.188	456.017	CCC(CC)CCCC(C)C	InChI=1/C11H24/c1-5-11(6-2)9-7-8-10(3)4/h10-11H,5-9H2,1-4H3
	100	Palmitic Acid, TMS derivative	55520-89-3	C19H40O2Si	328.28	1296.48	CCCCCCCCCCCCCCCC(O)=O	InChI=1/C16H32O2/c1-2-3-4-5-6-7-8-9-10-11-12-13-14-15-16(17)18/h2-15H2,1H3,(H,17,18)/f/h17H
	101	Phenylpyruvic acid oxime, 2TMS derivative	55530-64-8	C15H25NO3Si2	323.137	1154.65	ON=C(Cc1ccccc1)C(O)=O	InChI=1/C9H9NO3/c11-9(12)8(10-13)6-7-4-2-1-3-5-7/h1-5,13H,6H2,(H,11,12)/f/h11H
	102	Phosphine, [2-(6-methyl-2-pyridyl)ethyl](phenyl)-[3-(di-t-butylphosphino)propyl]-	1000163-56-9	C25H39NP2	415.256	743.144	Cc1cccc(CCP(CCCP(C(C)(C)C)C(C)(C)C)c2ccccc2)n1	InChI=1/C25H39NP2/c1-21-13-11-14-22(26-21)17-20-27(23-15-9-8-10-16-23)18-12-19-28(24(2,3)4)25(5,6)7/h8-11,13-16H,12,17-20H2,1-7H3
	103	Phosphoric acid, 1-[[(trimethylsilyl)oxy]methyl]-1,2-ethanediyl tetrakis(trimethylsilyl) ester	36449-17-9	C18H50O9P2Si5	612.178	1101.63	C[Si](C)(C)OCC(CO[P](=O)(O[Si](C)(C)C)O[Si](C)(C)C)O[P](=O)(O[Si](C)(C)C)O[Si](C)(C)C	InChI=1/C18H50O9P2Si5/c1-30(2,3)22-17-18(23-29(20,26-33(10,11)12)27-34(13,14)15)16-21-28(19,24-31(4,5)6)25-32(7,8)9/h18H,16-17H2,1-15H3
	104	Phosphoric acid, bis(trimethylsilyl) 2,3-bis[(trimethylsilyl)oxy]propyl ester	31038-11-6	C15H41O6PSi4	460.172	1101.71	C[Si](C)(C)OCC(CO[P](=O)(O[Si](C)(C)C)O[Si](C)(C)C)O[Si](C)(C)C	InChI=1/C15H41O6PSi4/c1-23(2,3)18-14-15(19-24(4,5)6)13-17-22(16,20-25(7,8)9)21-26(10,11)12/h15H,13-14H2,1-12H3
	105	Phosphoric acid, bis(trimethylsilyl)monomethyl ester	18291-81-1	C7H21O4PSi2	256.072	544.007	CO[P](=O)(O[Si](C)(C)C)O[Si](C)(C)C	InChI=1/C7H21O4PSi2/c1-9-12(8,10-13(2,3)4)11-14(5,6)7/h1-7H3
	106	Putrescine, 4TMS derivative	39772-63-9	C16H44N2Si4	376.258	404.366	NCCCCN	InChI=1/C4H12N2/c5-3-1-2-4-6/h1-6H2
	107	Pyridine, 3-methyl-2,6-diphenyl-	28489-52-3	C18H15N	245.12	716.044	Cc1ccc(nc1c2ccccc2)c3ccccc3	InChI=1/C18H15N/c1-14-12-13-17(15-8-4-2-5-9-15)19-18(14)16-10-6-3-7-11-16/h2-13H,1H3
	108	Pyroglutamic acid, TMS derivative	1000333-17-1	C8H15NO3Si	201.082	867.684	OC(=O)[C@@H]1CCC(=O)N1	InChI=1/C5H7NO3/c7-4-2-1-3(6-4)5(8)9/h3H,1-2H2,(H,6,7)(H,8,9)/t3-/m0/s1/f/h6,8H
	109	Silane, cyclohexyldimethoxymethyl-	17865-32-6	C9H20O2Si	188.123	521.058	COC(OC)[SiH2]C1CCCCC1	InChI=1/C9H20O2Si/c1-10-9(11-2)12-8-6-4-3-5-7-8/h8-9H,3-7,12H2,1-2H3
	110	Silane, diethyldecyloxypentyloxy-	1000363-03-7	C19H42O2Si	330.295	666.028	CCCCCCCCCCOCCCCCO[SiH](CC)CC	InChI=1/C19H42O2Si/c1-4-7-8-9-10-11-12-14-17-20-18-15-13-16-19-21-22(5-2)6-3/h22H,4-19H2,1-3H3
	111	Silane, diethylisobutoxyundecyloxy-	1000363-06-6	C19H42O2Si	330.295	674.582	CCCCCCCCCCC(OCC(C)C)O[SiH](CC)CC	InChI=1/C19H42O2Si/c1-6-9-10-11-12-13-14-15-16-19(20-17-18(4)5)21-22(7-2)8-3/h18-19,22H,6-17H2,1-5H3
	112	Silane, diethylpentyloxyundecyloxy-	1000363-03-8	C20H44O2Si	344.311	1415.1	CCCCCOCCCCCCCCCCCO[SiH](CC)CC	InChI=1/C20H44O2Si/c1-4-7-15-18-21-19-16-13-11-9-8-10-12-14-17-20-22-23(5-2)6-3/h23H,4-20H2,1-3H3
	113	Silanol, trimethyl-, phosphate (3:1)	10497-05-9	C9H27O4PSi3	314.095	648.052	C[Si](C)(C)O.C[Si](C)(C)O.C[Si](C)(C)O.O[P](O)(O)=O	InChI=1/3C3H10OSi.H3O4P/c4*1-5(2,3)4/h3*4H,1-3H3;(H3,1,2,3,4)/f/h;;;1-3H
	114	Stearic acid, TMS derivative	18748-91-9	C21H44O2Si	356.311	1429.49	CCCCCCCCCCCCCCCCCC(O)=O	InChI=1/C18H36O2/c1-2-3-4-5-6-7-8-9-10-11-12-13-14-15-16-17-18(19)20/h2-17H2,1H3,(H,19,20)/f/h19H
	115	Succinic acid, 2,2,3,3,4,4,5,5-octafluoropentyl 2-methylpent-3-yl ester	1000389-59-5	C15H20F8O4	416.123	648.321	CCC(OC(=O)CCC(=O)OCC(F)(F)C(F)(F)C(F)(F)C(F)F)C(C)C	InChI=1/C15H20F8O4/c1-4-9(8(2)3)27-11(25)6-5-10(24)26-7-13(18,19)15(22,23)14(20,21)12(16)17/h8-9,12H,4-7H2,1-3H3
	116	Succinic acid, di(3-oxobut-2-yl) ester	1000349-59-0	C12H18O6	258.11	311.568	CC(OC(=O)CCC(=O)OC(C)C(C)=O)C(C)=O	InChI=1/C12H18O6/c1-7(13)9(3)17-11(15)5-6-12(16)18-10(4)8(2)14/h9-10H,5-6H2,1-4H3
	117	Succinic anhydride, O,O'-bis(trimethylsilyl)-	77220-06-5	C10H20O3Si2	244.095	1237.28	C[Si](C)(C)Oc1oc(O[Si](C)(C)C)cc1	InChI=1/C10H20O3Si2/c1-14(2,3)12-9-7-8-10(11-9)13-15(4,5)6/h7-8H,1-6H3
	118	tert-Butylpentamethyldisiloxane	67875-54-1	C9H24OSi2	204.137	489.464	CC(C)(C)[Si](C)(C)O[Si](C)(C)C	InChI=1/C9H24OSi2/c1-9(2,3)12(7,8)10-11(4,5)6/h1-8H3
	119	Tetracosane	646-31-1	C24H50	338.391	1041.16	CCCCCCCCCCCCCCCCCCCCCCCC	InChI=1/C24H50/c1-3-5-7-9-11-13-15-17-19-21-23-24-22-20-18-16-14-12-10-8-6-4-2/h3-24H2,1-2H3
	120	Tetrahydrofuran	109-99-9	C4H8O	72.058	840.528	C1CCOC1	InChI=1/C4H8O/c1-2-4-5-3-1/h1-4H2
	121	Trisiloxane, octamethyl-	107-51-7	C8H24O2Si3	236.108	697.284	C[Si](C)(C)O[Si](C)(C)O[Si](C)(C)C	InChI=1/C8H24O2Si3/c1-11(2,3)9-13(7,8)10-12(4,5)6/h1-8H3
	122	Tyrosine, 2TMS derivative	7536-83-6	C15H27NO3Si2	325.153	1187.65	N[C@@H](Cc1ccc(O)cc1)C(O)=O	InChI=1/C9H11NO3/c10-8(9(12)13)5-6-1-3-7(11)4-2-6/h1-4,8,11H,5,10H2,(H,12,13)/t8-/m0/s1/f/h12H
	123	Urea, 2TMS derivative	18297-63-7	C7H20N2OSi2	204.111	609.332	NC(N)=O	InChI=1/CH4N2O/c2-1(3)4/h(H4,2,3,4)/f/h2-3H2
	124	Xanthene-9-carboxylic acid, TBDMS derivative	1000364-34-7	C20H24O3Si	340.149	670.395	OC(=O)C1c2ccccc2Oc3ccccc13	InChI=1/C14H10O3/c15-14(16)13-9-5-1-3-7-11(9)17-12-8-4-2-6-10(12)13/h1-8,13H,(H,15,16)/f/h15H
spleen	1	1-(Dimethyldodecylsilyloxy)hexadecane	1000299-99-8	C30H64OSi	468.473	789.421	CCCCCCCCCCCCCCCCO[Si](C)(C)CCCCCCCCCCCC	InChI=1/C30H64OSi/c1-5-7-9-11-13-15-17-18-19-20-21-23-25-27-29-31-32(3,4)30-28-26-24-22-16-14-12-10-8-6-2/h5-30H2,1-4H3
	2	1,2,4-Benzenetricarboxylic acid, 1,2-dimethyl ester	54699-35-3	C11H10O6	238.048	1974.19	COC(=O)c1ccc(cc1C(=O)OC)C([O-])=O	InChI=1/C11H10O6/c1-16-10(14)7-4-3-6(9(12)13)5-8(7)11(15)17-2/h3-5H,1-2H3,(H,12,13)/p-1/fC11H9O6/q-1
	3	1,3,2-Oxazaborolane, 2-butyl-	31748-10-4	C6H14BNO	127.117	362.285	CCCCB1NCCO1	InChI=1/C6H14BNO/c1-2-3-4-7-8-5-6-9-7/h8H,2-6H2,1H3
	4	1,3-Dihydroxyanthraquinone , O,O'-bis(trimethylsilyl)-	7336-62-1	C20H24O4Si2	384.121	1948.29	C[Si](C)(C)Oc1cc(O[Si](C)(C)C)c2C(=O)c3ccccc3C(=O)c2c1	InChI=1/C20H24O4Si2/c1-25(2,3)23-13-11-16-18(17(12-13)24-26(4,5)6)20(22)15-10-8-7-9-14(15)19(16)21/h7-12H,1-6H3
	5	1,4-Benzenediol, 2,5-dimethoxy-, diacetate	14786-37-9	C12H14O6	254.079	307.214	COc1cc(O)c(OC)cc1O.CC(O)=O.CC(O)=O	InChI=1/C8H10O4.2C2H4O2/c1-11-7-3-6(10)8(12-2)4-5(7)9;2*1-2(3)4/h3-4,9-10H,1-2H3;2*1H3,(H,3,4)/f/h;2*3H
	6	1-[4-(tert-Butyl)phenyl]-2-(4-toluidino)-1-ethanone	339241-81-5	C19H23NO	281.178	907.056	Cc1ccc(NCC(=O)c2ccc(cc2)C(C)(C)C)cc1	InChI=1/C19H23NO/c1-14-5-11-17(12-6-14)20-13-18(21)15-7-9-16(10-8-15)19(2,3)4/h5-12,20H,13H2,1-4H3
	7	11-Hydroxycannabinol	1000298-73-1	C21H26O3	326.188	1995.92	CCCCCc1cc(O)c2c(OC(C)(C)c3ccc(CO)cc23)c1	InChI=1/C21H26O3/c1-4-5-6-7-14-11-18(23)20-16-10-15(13-22)8-9-17(16)21(2,3)24-19(20)12-14/h8-12,22-23H,4-7,13H2,1-3H3
	8	17a-Aza-D-homoandrostan-17-one, (5.alpha.)-	17556-10-4	C19H31NO	289.241	1106.68	CC12CCC3C(CCC4CCCCC34C)C1CCC(=O)N2	InChI=1/C19H31NO/c1-18-11-4-3-5-13(18)6-7-14-15(18)10-12-19(2)16(14)8-9-17(21)20-19/h13-16H,3-12H2,1-2H3,(H,20,21)/f/h20H
	9	1-Acetylnaphthalen-8-ol	18528-55-7	C12H10O2	186.068	312.204	CC(=O)c1cccc2cccc(O)c12	InChI=1/C12H10O2/c1-8(13)10-6-2-4-9-5-3-7-11(14)12(9)10/h2-7,14H,1H3
	10	1-Hexadecanol, TBDMS derivative	76358-80-0	C22H48OSi	356.347	753.393	CCCCCCCCCCCCCCCCO	InChI=1/C16H34O/c1-2-3-4-5-6-7-8-9-10-11-12-13-14-15-16-17/h17H,2-16H2,1H3
	11	1H-Pyrrolo[2,3-b]pyridine, 3-iodo-	23616-57-1	C7H5IN2	243.95	1236.62	Ic1c[nH]c2ncccc12	InChI=1/C7H5IN2/c8-6-4-10-7-5(6)2-1-3-9-7/h1-4H,(H,9,10)/f/h10H
	12	1-Monopalmitin, 2TMS derivative	1188-74-5	C25H54O4Si2	474.356	1642.96	CCCCCCCCCCCCCCCC(=O)OCC(O)CO	InChI=1/C19H38O4/c1-2-3-4-5-6-7-8-9-10-11-12-13-14-15-19(22)23-17-18(21)16-20/h18,20-21H,2-17H2,1H3
	13	1-Octadecanol, TMS derivative	18748-98-6	C21H46OSi	342.332	1371.4	CCCCCCCCCCCCCCCCCCO	InChI=1/C18H38O/c1-2-3-4-5-6-7-8-9-10-11-12-13-14-15-16-17-18-19/h19H,2-18H2,1H3
	14	2,5-Piperazinedione, 2TMS derivative	3553-95-5	C10H22N2O2Si2	258.122	1152.42	O=C1CNC(=O)CN1	InChI=1/C4H6N2O2/c7-3-1-5-4(8)2-6-3/h1-2H2,(H,5,8)(H,6,7)/f/h5-6H
	15	2,6-Bis(tert-butyl)phenol, TMS derivative	10416-73-6	C17H30OSi	278.207	904.395	CC(C)(C)c1cccc(c1O)C(C)(C)C	InChI=1/C14H22O/c1-13(2,3)10-8-7-9-11(12(10)15)14(4,5)6/h7-9,15H,1-6H3
	16	2,6-Bis[4,5-dihydro-4-(1-methylethyl)oxazol-2-yl]pyridine	1000327-15-8	C17H23N3O2	301.179	891.7	CC(C)C1COC(=N1)c2cccc(n2)C3=NC(CO3)C(C)C	InChI=1/C17H23N3O2/c1-10(2)14-8-21-16(19-14)12-6-5-7-13(18-12)17-20-15(9-22-17)11(3)4/h5-7,10-11,14-15H,8-9H2,1-4H3
	17	2-Butenedioic acid, (E)-, 2TMS derivative	17962-03-7	C10H20O4Si2	260.09	715.799	OC(=O)/C=C/C(O)=O	InChI=1/C4H4O4/c5-3(6)1-2-4(7)8/h1-2H,(H,5,6)(H,7,8)/b2-1+/f/h5,7H
	18	2-Fluorobenzylamine, N,N-didecyl	1000310-31-8	C27H48FN	405.377	904.076	CCCCCCCCCCN(CCCCCCCCCC)Cc1ccccc1F	InChI=1/C27H48FN/c1-3-5-7-9-11-13-15-19-23-29(25-26-21-17-18-22-27(26)28)24-20-16-14-12-10-8-6-4-2/h17-18,21-22H,3-16,19-20,23-25H2,1-2H3
	19	2-Hydroxyskatole	1000378-98-6	C9H9NO	147.068	894.079	Cc1c(O)[nH]c2ccccc12	InChI=1/C9H9NO/c1-6-7-4-2-3-5-8(7)10-9(6)11/h2-5,10-11H,1H3
	20	2-Monostearin, 2TMS derivative	53336-13-3	C27H58O4Si2	502.387	1730.02
	21	2-Naphthyl tridecyl ether	1000211-66-3	C23H34O	326.261	1366.55	CCCCCCCCCCCCCOc1ccc2ccccc2c1	InChI=1/C23H34O/c1-2-3-4-5-6-7-8-9-10-11-14-19-24-23-18-17-21-15-12-13-16-22(21)20-23/h12-13,15-18,20H,2-11,14,19H2,1H3
	22	2-Palmitoylglycerol, 2TMS derivative	53212-97-8	C25H54O4Si2	474.356	1623.87	CCCCCCCCCCCCCCCC(=O)OC(CO)CO	InChI=1/C19H38O4/c1-2-3-4-5-6-7-8-9-10-11-12-13-14-15-19(22)23-18(16-20)17-21/h18,20-21H,2-17H2,1H3
	23	2-Thiazolidinethione	96-53-7	C3H5NS2	118.986	442.331	S=C1NCCS1	InChI=1/C3H5NS2/c5-3-4-1-2-6-3/h1-2H2,(H,4,5)/f/h4H
	24	3-((1-Amino-2-naphthyl)methylene)-2-benzofuran-1(3H)-one, TMS derivative, peak 2	1000332-21-7	C22H21NO2Si	359.134	739.874
	25	3,4-Dimethoxycinnamic acid, TMS derivative	27750-71-6	C14H20O4Si	280.113	1231.15	COc1ccc(C=CC(O)=O)cc1OC	InChI=1/C11H12O4/c1-14-9-5-3-8(4-6-11(12)13)7-10(9)15-2/h3-7H,1-2H3,(H,12,13)/f/h12H
	26	3H-Naphtho[2,3-b]furan-2-one, 3-[[2-(4-fluorophenyl)ethylamino]methyl]-5,8a-dimethyl-3a,5,6,7,8,8a,9,9a-octahydro-	1000302-83-6	C23H30FNO2	371.226	1415.59	CC1CCCC2(C)CC3OC(=O)C(CNCCc4ccc(F)cc4)C3C=C12	InChI=1/C23H30FNO2/c1-15-4-3-10-23(2)13-21-18(12-20(15)23)19(22(26)27-21)14-25-11-9-16-5-7-17(24)8-6-16/h5-8,12,15,18-19,21,25H,3-4,9-11,13-14H2,1-2H3
	27	3-Hydroxyproline, 3TMS derivative	1000075-11-6	C14H33NO3Si3	347.177	1183.71	OC1CCN[C@@H]1C(O)=O	InChI=1/C5H9NO3/c7-3-1-2-6-4(3)5(8)9/h3-4,6-7H,1-2H2,(H,8,9)/t3?,4-/m0/s1/f/h8H
	28	4-[(2-Hydroxy-benzylidene)-amino]-benzoic acid	788-24-9	C14H11NO3	241.074	577.29	OC(=O)c1ccc(cc1)N=Cc2ccccc2O	InChI=1/C14H11NO3/c16-13-4-2-1-3-11(13)9-15-12-7-5-10(6-8-12)14(17)18/h1-9,16H,(H,17,18)/f/h17H
	29	4'-Chloro-6,8-dimethylcinchophen	351357-26-1	C18H14ClNO2	311.071	1992.22	Cc1cc(C)c2nc(cc(C(O)=O)c2c1)c3ccc(Cl)cc3	InChI=1/C18H14ClNO2/c1-10-7-11(2)17-14(8-10)15(18(21)22)9-16(20-17)12-3-5-13(19)6-4-12/h3-9H,1-2H3,(H,21,22)/f/h21H
	30	4H-1-Benzopyran-4-one, 3-(3,4-dimethoxyphenyl)-6,7-dimethoxy-	24126-93-0	C19H18O6	342.11	1428.21	COc1ccc(cc1OC)C2=COc3cc(OC)c(OC)cc3C2=O	InChI=1/C19H18O6/c1-21-14-6-5-11(7-16(14)22-2)13-10-25-15-9-18(24-4)17(23-3)8-12(15)19(13)20/h5-10H,1-4H3
	31	4-Hexenoic acid, 5-amino-3-oxo-, methyl ester	52812-86-9	C7H11NO3	157.074	866.572	COC(=O)CC(=O)C=C(C)N	InChI=1/C7H11NO3/c1-5(8)3-6(9)4-7(10)11-2/h3H,4,8H2,1-2H3
	32	4-Methylthio-N-phenyl-1,2-carbazoledicarboximide	22359-21-3	C21H14N2O2S	358.078	1575.36	CSc1cc2C(=O)N(C(=O)c2c3[nH]c4ccccc4c13)c5ccccc5	InChI=1/C21H14N2O2S/c1-26-16-11-14-18(19-17(16)13-9-5-6-10-15(13)22-19)21(25)23(20(14)24)12-7-3-2-4-8-12/h2-11,22H,1H3
	33	4-Pyridinol, TMS derivative	1000352-50-3	C8H13NOSi	167.077	387.537	Oc1ccncc1	InChI=1/C5H5NO/c7-5-1-3-6-4-2-5/h1-4H,(H,6,7)/f/h7H
	34	4-tert-Butylphenol, TMS derivative	25237-79-0	C13H22OSi	222.144	1985.8	CC(C)(C)c1ccc(O)cc1	InChI=1/C10H14O/c1-10(2,3)8-4-6-9(11)7-5-8/h4-7,11H,1-3H3
	35	5-Ethyl-5-methylnonadecane	1000360-42-7	C22H46	310.36	1041.09	CCCCCCCCCCCCCCC(C)(CC)CCCC	InChI=1/C22H46/c1-5-8-10-11-12-13-14-15-16-17-18-19-21-22(4,7-3)20-9-6-2/h5-21H2,1-4H3
	36	5-Methyluridine, 3TMS derivative	1000375-67-4	C19H38N2O6Si3	474.204	1543.94	CC1=CN([C@@H]2O[C@H](CO)[C@@H](O)[C@H]2O)C(=O)NC1=O	InChI=1/C10H14N2O6/c1-4-2-12(10(17)11-8(4)16)9-7(15)6(14)5(3-13)18-9/h2,5-7,9,13-15H,3H2,1H3,(H,11,16,17)/t5-,6-,7-,9-/m1/s1/f/h11H
	37	6,7-Dimethoxy-2-[(pyrimidin-2-yl)amino]-3H-quinazolin-4-one	1000388-64-7	C14H13N5O3	299.102	729.726	COc1cc2N=C(NC(=O)c2cc1OC)Nc3ncccn3	InChI=1/C14H13N5O3/c1-21-10-6-8-9(7-11(10)22-2)17-14(18-12(8)20)19-13-15-4-3-5-16-13/h3-7H,1-2H3,(H2,15,16,17,18,19,20)/f/h18-19H
	38	6-Methyl-2,5-diphenyl-6,7-dihydropyrazolo[1,5-c]pyrimidin-7-one	110950-94-2	C19H15N3O	301.122	692.07	CN1C(=O)n2nc(cc2C=C1c3ccccc3)c4ccccc4	InChI=1/C19H15N3O/c1-21-18(15-10-6-3-7-11-15)13-16-12-17(20-22(16)19(21)23)14-8-4-2-5-9-14/h2-13H,1H3
	39	7-Hydroxy-3-(1H-imidazol-4-yl)-4H-chromen-4-one TMS	1000331-93-3	C15H16N2O3Si	300.093	707.755
	40	9,10-anthracenedione, 1-amino-4-[(4-methylphenyl)amino]-	1000402-38-7	C21H16N2O2	328.121	1297.33	Cc1ccc(Nc2ccc(N)c3C(=O)c4ccccc4C(=O)c23)cc1	InChI=1/C21H16N2O2/c1-12-6-8-13(9-7-12)23-17-11-10-16(22)18-19(17)21(25)15-5-3-2-4-14(15)20(18)24/h2-11,23H,22H2,1H3
	41	9,12-Octadecadienoic acid (Z,Z)-, TMS derivative	56259-07-5	C21H40O2Si	352.28	1409.54	CCCCC/C=C/C/C=C/CCCCCCCC(O)=O	InChI=1/C18H32O2/c1-2-3-4-5-6-7-8-9-10-11-12-13-14-15-16-17-18(19)20/h6-7,9-10H,2-5,8,11-17H2,1H3,(H,19,20)/b7-6+,10-9+/f/h19H
	42	Alanine, N-methyl-N-neopentyloxycarbonyl-, pentyl ester	1000329-44-5	C15H29NO4	287.21	381.159	CCCCCOC(=O)[C@H](C)N(C)C(=O)OCC(C)(C)C	InChI=1/C15H29NO4/c1-7-8-9-10-19-13(17)12(2)16(6)14(18)20-11-15(3,4)5/h12H,7-11H2,1-6H3/t12-/m0/s1
	43	Aminomalonic acid, tris(trimethylsilyl)-	1000079-52-5	C12H29NO4Si3	335.14	841.649	C[Si](C)(C)OC(=O)C(N)(C(=O)O[Si](C)(C)C)[Si](C)(C)C	InChI=1/C12H29NO4Si3/c1-18(2,3)12(13,10(14)16-19(4,5)6)11(15)17-20(7,8)9/h13H2,1-9H3
	44	Androst-2-en-17-amine, 4,4-dimethyl-N-(2-phenylethyl)-, (5.alpha.)-	53286-45-6	C29H43N	405.34	1294.86	CC1(C)C=CC[C@]2(C)[C@H]3CC[C@]4(C)C(CC[C@H]4[C@@H]3CC[C@@H]12)NCCc5ccccc5	InChI=1/C29H43N/c1-27(2)17-8-18-28(3)24-15-19-29(4)23(22(24)11-13-25(27)28)12-14-26(29)30-20-16-21-9-6-5-7-10-21/h5-10,17,22-26,30H,11-16,18-20H2,1-4H3/t22-,23-,24-,25-,26?,28+,29-/m0/s1
	45	Arabinitol, 5TMS derivative	25138-28-7	C20H52O5Si5	512.266	1060.7	OC[C@@H](O)[C@@H](O)[C@H](O)CO	InChI=1/C5H12O5/c6-1-3(8)5(10)4(9)2-7/h3-10H,1-2H2/t3-,4-/m1/s1
	46	Arachidonic acid, TMS derivative	113516-18-0	C23H40O2Si	376.28	1510.53	CCCCC/C=C\C\C=C/C/C=C\C\C=C/CCCC(O)=O	InChI=1/C20H32O2/c1-2-3-4-5-6-7-8-9-10-11-12-13-14-15-16-17-18-19-20(21)22/h6-7,9-10,12-13,15-16H,2-5,8,11,14,17-19H2,1H3,(H,21,22)/b7-6-,10-9-,13-12-,16-15-/f/h21H
	47	Aspartic acid, 3TMS derivative	15985-05-4	C13H31NO4Si3	349.156	888.141	N[C@@H](CC(O)=O)C(O)=O	InChI=1/C4H7NO4/c5-2(4(8)9)1-3(6)7/h2H,1,5H2,(H,6,7)(H,8,9)/t2-/m0/s1/f/h6,8H
	48	Benzaldehyde, 4-nitro-, 4-iodophenylhydrazone	1000272-28-0	C13H10IN3O2	366.982	1952.21	[O-][N+](=O)c1ccc(cc1)C=NNc2ccc(I)cc2	InChI=1/C13H10IN3O2/c14-11-3-5-12(6-4-11)16-15-9-10-1-7-13(8-2-10)17(18)19/h1-9,16H
	49	Benzamide, N-(4-methoxyphenyl)-4-ethyl-	1000307-01-6	C16H17NO2	255.126	797.145	CCc1ccc(cc1)C(=O)Nc2ccc(OC)cc2	InChI=1/C16H17NO2/c1-3-12-4-6-13(7-5-12)16(18)17-14-8-10-15(19-2)11-9-14/h4-11H,3H2,1-2H3,(H,17,18)/f/h17H
	50	benzene, 1,1'-methylenebis[3-(1,1-dimethylethyl)-5-methyl-4-[(trimethylsilyl)oxy]-	1000399-56-2	C29H48O2Si2	484.319	1607.61	Cc1cc(Cc2cc(C)c(O[Si](C)(C)C)c(c2)C(C)(C)C)cc(c1O[Si](C)(C)C)C(C)(C)C	InChI=1/C29H48O2Si2/c1-20-15-22(18-24(28(3,4)5)26(20)30-32(9,10)11)17-23-16-21(2)27(31-33(12,13)14)25(19-23)29(6,7)8/h15-16,18-19H,17H2,1-14H3
	51	Benzene, 1,2,3-trimethyl-	526-73-8	C9H12	120.094	376.537	Cc1cccc(C)c1C	InChI=1/C9H12/c1-7-5-4-6-8(2)9(7)3/h4-6H,1-3H3
	52	Benzene, 1-ethyl-2-methyl-	611-14-3	C9H12	120.094	331.802	CCc1ccccc1C	InChI=1/C9H12/c1-3-9-7-5-4-6-8(9)2/h4-7H,3H2,1-2H3
	53	Benzene, 1-ethyl-4-methyl-	622-96-8	C9H12	120.094	320.267	CCc1ccc(C)cc1	InChI=1/C9H12/c1-3-9-6-4-8(2)5-7-9/h4-7H,3H2,1-2H3
	54	Bisphenol A monomethyl ether, TMS derivative	1000283-55-5	C19H26O2Si	314.17	677.684	COC.CC(C)(c1ccc(O)cc1)c2ccc(O)cc2	InChI=1/C15H16O2.C2H6O/c1-15(2,11-3-7-13(16)8-4-11)12-5-9-14(17)10-6-12;1-3-2/h3-10,16-17H,1-2H3;1-2H3
	55	Bisphenol A, 2TMS derivative	4387-16-0	C21H32O2Si2	372.194	1421.87	CC(C)(c1ccc(O)cc1)c2ccc(O)cc2	InChI=1/C15H16O2/c1-15(2,11-3-7-13(16)8-4-11)12-5-9-14(17)10-6-12/h3-10,16-17H,1-2H3
	56	Butylphosphonic acid, butyl 4-methylaminophenyl ester	1000323-02-8	C15H26NO3P	299.165	967.315	CCCCO[P](=O)(CCCC)Oc1ccc(NC)cc1	InChI=1/C15H26NO3P/c1-4-6-12-18-20(17,13-7-5-2)19-15-10-8-14(16-3)9-11-15/h8-11,16H,4-7,12-13H2,1-3H3
	57	Cholesterol, TMS derivative	1856-05-9	C30H54OSi	458.394	1951.43	CC(C)CCC[C@@H](C)[C@H]1CC[C@H]2[C@@H]3CC=C4C[C@@H](O)CC[C@]4(C)[C@H]3CC[C@]12C	InChI=1/C27H46O/c1-18(2)7-6-8-19(3)23-11-12-24-22-10-9-20-17-21(28)13-15-26(20,4)25(22)14-16-27(23,24)5/h9,18-19,21-25,28H,6-8,10-17H2,1-5H3/t19-,21+,22+,23-,24+,25+,26+,27-/m1/s1
	58	Conanine, (5.alpha.)-	468-33-7	C22H37N	315.293	691.086	CC1C2CCC3C4CCC5CCCCC5(C)C4CCC23CN1C	InChI=1/C22H37N/c1-15-18-9-10-20-17-8-7-16-6-4-5-12-21(16,2)19(17)11-13-22(18,20)14-23(15)3/h15-20H,4-14H2,1-3H3
	59	Cyclohexanone, O-methyloxime	13858-85-0	C7H13NO	127.1	346.865	CON=C1CCCCC1	InChI=1/C7H13NO/c1-9-8-7-5-3-2-4-6-7/h2-6H2,1H3
	60	Cystathionine, 2TMS derivative	73090-79-6	C13H30N2O4SSi2	366.146	352.063	N[C@@H](CCSC[C@H](N)C(O)=O)C(O)=O	InChI=1/C7H14N2O4S/c8-4(6(10)11)1-2-14-3-5(9)7(12)13/h4-5H,1-3,8-9H2,(H,10,11)(H,12,13)/t4-,5-/m0/s1/f/h10,12H
	61	D-Allose, pentakis(trimethylsilyl) ether, methyloxime (syn)	1000380-19-7	C22H55NO6Si5	569.288	1203.64
	62	Decane, 2,4,6-trimethyl-	62108-27-4	C13H28	184.219	414.067	CCCCC(C)CC(C)CC(C)C	InChI=1/C13H28/c1-6-7-8-12(4)10-13(5)9-11(2)3/h11-13H,6-10H2,1-5H3
	63	Decane, 4-methyl-	2847-72-5	C11H24	156.188	371.05	CCCCCCC(C)CCC	InChI=1/C11H24/c1-4-6-7-8-10-11(3)9-5-2/h11H,4-10H2,1-3H3
	64	D-Fructose, 1,3,4,5,6-pentakis-O-(trimethylsilyl)-, O-methyloxime	56196-14-6	C22H55NO6Si5	569.288	1193.34	CO\N=C(/CO[Si](C)(C)C)C(O[Si](C)(C)C)C(O[Si](C)(C)C)C(CO[Si](C)(C)C)O[Si](C)(C)C	InChI=1/C22H55NO6Si5/c1-24-23-19(17-25-30(2,3)4)21(28-33(11,12)13)22(29-34(14,15)16)20(27-32(8,9)10)18-26-31(5,6)7/h20-22H,17-18H2,1-16H3/b23-19+
	65	d-Fructose, 1,3,4,5-tetrakis-O-(trimethylsilyl)-, o-methyloxime, 6-[bis(trimethylsilyl) phosphate]	55530-74-0	C25H64NO9PSi6	721.293	1500.77	CO\N=C(/CO[Si](C)(C)C)C(O[Si](C)(C)C)C(O[Si](C)(C)C)C(CO[P](=O)(O[Si](C)(C)C)O[Si](C)(C)C)O[Si](C)(C)C	InChI=1/C25H64NO9PSi6/c1-28-26-22(20-30-37(2,3)4)24(32-39(8,9)10)25(33-40(11,12)13)23(31-38(5,6)7)21-29-36(27,34-41(14,15)16)35-42(17,18)19/h23-25H,20-21H2,1-19H3/b26-22+
	66	D-Glucitol, 6TMS derivative	14199-80-5	C24H62O6Si6	614.316	1241.98	OC[C@@H](O)[C@@H](O)[C@H](O)[C@@H](O)CO	InChI=1/C6H14O6/c7-1-3(9)5(11)6(12)4(10)2-8/h3-12H,1-2H2/t3-,4+,5-,6-/m1/s1
	67	Diethyl tartrate, [S-(R*,R*)]-, 2TMS derivative	73639-61-9	C14H30O6Si2	350.158	981.939
	68	Difenoxin	28782-42-5	C28H28N2O2	424.215	980.995	OC(=O)C1(CCN(CC1)CCC(C#N)(c2ccccc2)c3ccccc3)c4ccccc4	InChI=1/C28H28N2O2/c29-22-28(24-12-6-2-7-13-24,25-14-8-3-9-15-25)18-21-30-19-16-27(17-20-30,26(31)32)23-10-4-1-5-11-23/h1-15H,16-21H2,(H,31,32)/f/h31H
	69	d-Mannose, 2,3,4,5,6-pentakis-O-(trimethylsilyl)-, o-methyloxyme, (1Z)-	128705-67-9	C22H55NO6Si5	569.288	1212.65	CO\N=C/C(O[Si](C)(C)C)C(O[Si](C)(C)C)C(O[Si](C)(C)C)C(CO[Si](C)(C)C)O[Si](C)(C)C	InChI=1/C22H55NO6Si5/c1-24-23-17-19(26-31(5,6)7)21(28-33(11,12)13)22(29-34(14,15)16)20(27-32(8,9)10)18-25-30(2,3)4/h17,19-22H,18H2,1-16H3/b23-17-
	70	D-Mannose, 2,3,4,5-tetrakis-O-(trimethylsilyl)-, O-methyloxime, 6-[bis(trimethylsilyl) phosphate]	55530-76-2	C25H64NO9PSi6	721.293	1507.86	CO/N=C/C(O[Si](C)(C)C)C(O[Si](C)(C)C)C(O[Si](C)(C)C)C(CO[P](=O)(O[Si](C)(C)C)O[Si](C)(C)C)O[Si](C)(C)C	InChI=1/C25H64NO9PSi6/c1-28-26-20-22(30-37(2,3)4)24(32-39(8,9)10)25(33-40(11,12)13)23(31-38(5,6)7)21-29-36(27,34-41(14,15)16)35-42(17,18)19/h20,22-25H,21H2,1-19H3/b26-20+
	71	D-Myo-Inositol, 1,2,4,5,6-pentakis-O-(trimethylsilyl)-, bis(trimethylsilyl) phosphate	55568-91-7	C27H69O9PSi7	764.306	1565.06	C[Si](C)(C)OC1C(O[Si](C)(C)C)C(O[Si](C)(C)C)C(O[P](=O)(O[Si](C)(C)C)O[Si](C)(C)C)C(O[Si](C)(C)C)C1O[Si](C)(C)C	InChI=1/C27H69O9PSi7/c1-38(2,3)30-23-22(29-37(28,35-43(16,17)18)36-44(19,20)21)24(31-39(4,5)6)26(33-41(10,11)12)27(34-42(13,14)15)25(23)32-40(7,8)9/h22-27H,1-21H3
	72	Dodecane	112-40-3	C12H26	170.203	560.126	CCCCCCCCCCCC	InChI=1/C12H26/c1-3-5-7-9-11-12-10-8-6-4-2/h3-12H2,1-2H3
	73	D-Ribofuranose, 1,2,3,5-tetrakis-O-(trimethylsilyl)-	56271-69-3	C17H42O5Si4	438.211	1171.1	C[Si](C)(C)OCC1OC(O[Si](C)(C)C)C(O[Si](C)(C)C)C1O[Si](C)(C)C	InChI=1/C17H42O5Si4/c1-23(2,3)18-13-14-15(20-24(4,5)6)16(21-25(7,8)9)17(19-14)22-26(10,11)12/h14-17H,13H2,1-12H3
	74	d-Ribose, 2,3,4,5-tetrakis-O-(trimethylsilyl)-, O-methyloxime	56196-08-8	C18H45NO5Si4	467.237	1035.63	CO/N=C/C(O[Si](C)(C)C)C(O[Si](C)(C)C)C(CO[Si](C)(C)C)O[Si](C)(C)C	InChI=1/C18H45NO5Si4/c1-20-19-14-16(22-26(5,6)7)18(24-28(11,12)13)17(23-27(8,9)10)15-21-25(2,3)4/h14,16-18H,15H2,1-13H3/b19-14+
	75	Eicosane, 1-iodo-	1000406-31-8	C20H41I	408.225	854.333	CCCCCCCCCCCCCCCCCCCCI	InChI=1/C20H41I/c1-2-3-4-5-6-7-8-9-10-11-12-13-14-15-16-17-18-19-20-21/h2-20H2,1H3
	76	Estra-1,3,5(10)-trien-6-one, 3,17-bis(acetyloxy)-2-methoxy-, (17.beta.)-	69540-62-1	C23H28O6	400.189	1421.41	COc1cc2[C@H]3CC[C@]4(C)[C@H](CC[C@H]4[C@@H]3CC(=O)c2cc1OC(C)=O)OC(C)=O	InChI=1/C23H28O6/c1-12(24)28-21-11-17-15(10-20(21)27-4)14-7-8-23(3)18(16(14)9-19(17)26)5-6-22(23)29-13(2)25/h10-11,14,16,18,22H,5-9H2,1-4H3/t14-,16-,18+,22+,23+/m1/s1
	77	Ethane, hexafluoro-	76-16-4	C2F6	137.99	319.071	FC(F)(F)C(F)(F)F	InChI=1/C2F6/c3-1(4,5)2(6,7)8
	78	ethanol, 2,2'-[(1-methylethylidene)bis(4,1-phenyleneoxy)]bis-	1000402-29-3	C19H24O4	316.167	660.165	CC(C)(c1ccc(OCCO)cc1)c2ccc(OCCO)cc2	InChI=1/C19H24O4/c1-19(2,15-3-7-17(8-4-15)22-13-11-20)16-5-9-18(10-6-16)23-14-12-21/h3-10,20-21H,11-14H2,1-2H3
	79	Formic acid, 1-methylethyl ester	625-55-8	C4H8O2	88.052	647.736	CC(C)OC=O	InChI=1/C4H8O2/c1-4(2)6-3-5/h3-4H,1-2H3
	80	Galactitol, 6TMS derivative	18919-39-6	C24H62O6Si6	614.316	1246.01	OC[C@@H](O)[C@H](O)[C@H](O)[C@@H](O)CO	InChI=1/C6H14O6/c7-1-3(9)5(11)6(12)4(10)2-8/h3-12H,1-2H2/t3-,4+,5+,6-
	81	Galactose oxime, 6TMS derivative	120850-88-6	C24H61NO6Si6	627.311	1226.09	OC[C@@H](O)[C@H](O)[C@H](O)[C@@H](O)C=NO	InChI=1/C6H13NO6/c8-2-4(10)6(12)5(11)3(9)1-7-13/h1,3-6,8-13H,2H2/t3-,4+,5+,6-/m0/s1
	82	Glycerol monostearate, 2TMS derivative	1188-75-6	C27H58O4Si2	502.387	1748.05	CCCCCCCCCCCCCCCCCC(O)=O.OCC(O)CO	InChI=1/C18H36O2.C3H8O3/c1-2-3-4-5-6-7-8-9-10-11-12-13-14-15-16-17-18(19)20;4-1-3(6)2-5/h2-17H2,1H3,(H,19,20);3-6H,1-2H2/f/h19H;
	83	Glycerol, 3TMS derivative	6787-10-06	C12H32O3Si3	308.166	648.791	OCC(O)CO	InChI=1/C3H8O3/c4-1-3(6)2-5/h3-6H,1-2H2
	84	Glycine, 2TMS derivative	7364-42-3	C8H21NO2Si2	219.111	479.555	NCC(O)=O	InChI=1/C2H5NO2/c3-1-2(4)5/h1,3H2,(H,4,5)/f/h4H
	85	Glycolic acid, 2TMS derivative	33581-77-0	C8H20O3Si2	220.095	431.907	OCC(O)=O	InChI=1/C2H4O3/c3-1-2(4)5/h3H,1H2,(H,4,5)/f/h4H
	86	Glycylglutamic acid, 2TMS derivative	1000333-69-4	C13H28N2O5Si2	348.154	892.691	NCC(=O)N[C@@H](CCC(O)=O)C(O)=O	InChI=1/C7H12N2O5/c8-3-5(10)9-4(7(13)14)1-2-6(11)12/h4H,1-3,8H2,(H,9,10)(H,11,12)(H,13,14)/t4-/m0/s1/f/h9,11,13H
	87	Heptadecanoic acid, TMS derivative	55517-58-3	C20H42O2Si	342.295	1364.21	CCCCCCCCCCCCCCCCC(O)=O	InChI=1/C17H34O2/c1-2-3-4-5-6-7-8-9-10-11-12-13-14-15-16-17(18)19/h2-16H2,1H3,(H,18,19)/f/h18H
	88	Isophosphinoline	253-37-2	C9H7P	146.029	1749.71	c1ccc2cpccc2c1	InChI=1/C9H7P/c1-2-4-9-7-10-6-5-8(9)3-1/h1-7H
	89	Isophthalic acid, 4-nitrophenyl pentyl ester	1000344-68-1	C19H19NO6	357.121	665.349	CCCCCOC(=O)c1cccc(c1)C(=O)Oc2ccc(cc2)[N+]([O-])=O	InChI=1/C19H19NO6/c1-2-3-4-12-25-18(21)14-6-5-7-15(13-14)19(22)26-17-10-8-16(9-11-17)20(23)24/h5-11,13H,2-4,12H2,1H3
	90	L-5-Oxoproline, , 2TMS derivative	30274-77-2	C11H23NO3Si2	273.122	887.193
	91	Lactic Acid, 2TMS derivative	17596-96-2	C9H22O3Si2	234.111	416.692	CC(O)C(O)=O	InChI=1/C3H6O3/c1-2(4)3(5)6/h2,4H,1H3,(H,5,6)/f/h5H
	92	L-Alanine, 2TMS derivative	27844-07-1	C9H23NO2Si2	233.127	461.914	C[C@H](N)C(O)=O	InChI=1/C3H7NO2/c1-2(4)3(5)6/h2H,4H2,1H3,(H,5,6)/t2-/m0/s1/f/h5H
	93	L-Aspartic acid, 2TMS derivative	1000333-28-8	C10H23NO4Si2	277.117	792.696	N[C@@H](CC(O)=O)C(O)=O	InChI=1/C4H7NO4/c5-2(4(8)9)1-3(6)7/h2H,1,5H2,(H,6,7)(H,8,9)/t2-/m0/s1/f/h6,8H
	94	Levobunolol methylboronate	127202-08-8	C18H26BNO3	315.201	712.916	CB1OC(COc2cccc3C(=O)CCCc23)CN1C(C)(C)C	InChI=1/C18H26BNO3/c1-18(2,3)20-11-13(23-19(20)4)12-22-17-10-6-7-14-15(17)8-5-9-16(14)21/h6-7,10,13H,5,8-9,11-12H2,1-4H3
	95	L-Glutamic acid, 3TMS derivative	15985-07-6	C14H33NO4Si3	363.172	974.734	N[C@@H](CCC(O)=O)C(O)=O	InChI=1/C5H9NO4/c6-3(5(9)10)1-2-4(7)8/h3H,1-2,6H2,(H,7,8)(H,9,10)/t3-/m0/s1/f/h7,9H
	96	L-Isoleucine, TMS derivative	1000333-27-3	C9H21NO2Si	203.134	538.724	CC[C@H](C)[C@H](N)C(O)=O	InChI=1/C6H13NO2/c1-3-4(2)5(7)6(8)9/h4-5H,3,7H2,1-2H3,(H,8,9)/t4-,5-/m0/s1/f/h8H
	97	L-Leucine, TMS derivative	1000333-25-0	C9H21NO2Si	203.134	515.916	CC(C)C[C@H](N)C(O)=O	InChI=1/C6H13NO2/c1-4(2)3-5(7)6(8)9/h4-5H,3,7H2,1-2H3,(H,8,9)/t5-/m0/s1/f/h8H
	98	L-Norleucine, 2TMS derivative	55320-11-1	C12H29NO2Si2	275.174	385.914	CCCC[C@H](N)C(O)=O	InChI=1/C6H13NO2/c1-2-3-4-5(7)6(8)9/h5H,2-4,7H2,1H3,(H,8,9)/t5-/m0/s1/f/h8H
	99	L-Proline, 1-(trifluoroacetyl)-, butyl ester	2563-29-3	C11H16F3NO3	267.108	494.851	CCCCOC(=O)[C@@H]1CCCN1C(=O)C(F)(F)F	InChI=1/C11H16F3NO3/c1-2-3-7-18-9(16)8-5-4-6-15(8)10(17)11(12,13)14/h8H,2-7H2,1H3/t8-/m0/s1
	100	L-Proline, TMS derivative	1000333-26-2	C8H17NO2Si	187.103	380.856	OC(=O)[C@@H]1CCCN1	InChI=1/C5H9NO2/c7-5(8)4-2-1-3-6-4/h4,6H,1-3H2,(H,7,8)/t4-/m0/s1/f/h7H
	101	L-Serine, 2TMS derivative	70125-39-2	C9H23NO3Si2	249.122	626.679	N[C@@H](CO)C(O)=O	InChI=1/C3H7NO3/c4-2(1-5)3(6)7/h2,5H,1,4H2,(H,6,7)/t2-/m0/s1/f/h6H
	102	L-Threonic acid, tris(trimethylsilyl) ether, trimethylsilyl ester	1000352-53-3	C16H40O5Si4	424.195	931.398
	103	L-Threonine, 2TMS derivative	7536-82-5	C10H25NO3Si2	263.137	665.811	C[C@@H](O)[C@H](N)C(O)=O	InChI=1/C4H9NO3/c1-2(6)3(5)4(7)8/h2-3,6H,5H2,1H3,(H,7,8)/t2-,3+/m1/s1/f/h7H
	104	L-Tryptophan, 3TMS derivative	55429-28-2	C20H36N2O2Si3	420.208	914.079	N[C@@H](Cc1c[nH]c2ccccc12)C(O)=O	InChI=1/C11H12N2O2/c12-9(11(14)15)5-7-6-13-10-4-2-1-3-8(7)10/h1-4,6,9,13H,5,12H2,(H,14,15)/t9-/m0/s1/f/h14H
	105	L-Valine, TMS derivative	7480-78-6	C8H19NO2Si	189.119	441.231	CC(C)[C@H](N)C(O)=O	InChI=1/C5H11NO2/c1-3(2)4(6)5(7)8/h3-4H,6H2,1-2H3,(H,7,8)/t4-/m0/s1/f/h7H
	106	Malic acid, 3TMS derivative	38166-11-9	C13H30O5Si3	350.14	859.486	OC(CC(O)=O)C(O)=O	InChI=1/C4H6O5/c5-2(4(8)9)1-3(6)7/h2,5H,1H2,(H,6,7)(H,8,9)/f/h6,8H
	107	Mesitylene	108-67-8	C9H12	120.094	345.975	Cc1cc(C)cc(C)c1	InChI=1/C9H12/c1-7-4-8(2)6-9(3)5-7/h4-6H,1-3H3
	108	Methyl glycocholate, 3TMS derivative	57326-16-6	C36H69NO6Si3	695.443	1840.27
	109	Myo-Inositol, 6TMS derivative	2582-79-8	C24H60O6Si6	612.301	1349.91	OC1C(O)C(O)C(O)C(O)C1O	InChI=1/C6H12O6/c7-1-2(8)4(10)6(12)5(11)3(1)9/h1-12H
	110	Myristic acid, TBDMS derivative	104255-79-0	C20H42O2Si	342.295	1151.63	CCCCCCCCCCCCCC(O)=O	InChI=1/C14H28O2/c1-2-3-4-5-6-7-8-9-10-11-12-13-14(15)16/h2-13H2,1H3,(H,15,16)/f/h15H
	111	N-(tert-Butoxycarbonyl)-L-aspartic acid, N-trimethylsilyl-, bis(trimethylsilyl) ester	1000333-14-2	C18H39NO6Si3	449.209	1099.61	CC(C)(C)OC(=O)N([C@@H](CC(=O)O[Si](C)(C)C)C(=O)O[Si](C)(C)C)[Si](C)(C)C	InChI=1/C18H39NO6Si3/c1-18(2,3)23-17(22)19(26(4,5)6)14(16(21)25-28(10,11)12)13-15(20)24-27(7,8)9/h14H,13H2,1-12H3/t14-/m0/s1
	112	N-Isopropylethylenediamine	19522-67-9	C5H14N2	102.116	839.147	CC(C)NCCN	InChI=1/C5H14N2/c1-5(2)7-4-3-6/h5,7H,3-4,6H2,1-2H3
	113	Nonane, 4,5-dimethyl-	17302-23-7	C11H24	156.188	408.196	CCCCC(C)C(C)CCC	InChI=1/C11H24/c1-5-7-9-11(4)10(3)8-6-2/h10-11H,5-9H2,1-4H3
	114	Norpseudoephedrine	36393-56-3	C9H13NO	151.1	305.72	C[C@@H](N)[C@H](O)c1ccccc1	InChI=1/C9H13NO/c1-7(10)9(11)8-5-3-2-4-6-8/h2-7,9,11H,10H2,1H3/t7-,9+/m1/s1
	115	Oleic Acid, (Z)-, TMS derivative	21556-26-3	C21H42O2Si	354.295	1413.08	CCCCCCCC\C=C/CCCCCCCC(O)=O	InChI=1/C18H34O2/c1-2-3-4-5-6-7-8-9-10-11-12-13-14-15-16-17-18(19)20/h9-10H,2-8,11-17H2,1H3,(H,19,20)/b10-9-/f/h19H
	116	Oxalic acid, 2TMS derivative	18294-04-7	C8H18O4Si2	234.074	559.726	OC(=O)C(O)=O	InChI=1/C2H2O4/c3-1(4)2(5)6/h(H,3,4)(H,5,6)/f/h3,5H
	117	Oxazole, 2-[1,1'-biphenyl]-4-yl-5-phenyl-	852-37-9	C21H15NO	297.115	1428.72	o1c(cnc1c2ccc(cc2)c3ccccc3)c4ccccc4	InChI=1/C21H15NO/c1-3-7-16(8-4-1)17-11-13-19(14-12-17)21-22-15-20(23-21)18-9-5-2-6-10-18/h1-15H
	118	Palmitic Acid, TMS derivative	55520-89-3	C19H40O2Si	328.28	1296.45	CCCCCCCCCCCCCCCC(O)=O	InChI=1/C16H32O2/c1-2-3-4-5-6-7-8-9-10-11-12-13-14-15-16(17)18/h2-15H2,1H3,(H,17,18)/f/h17H
	119	Pentadecane	629-62-9	C15H32	212.25	643.889	CCCCCCCCCCCCCCC	InChI=1/C15H32/c1-3-5-7-9-11-13-15-14-12-10-8-6-4-2/h3-15H2,1-2H3
	120	Pentasiloxane, dodecamethyl-	141-63-9	C12H36O4Si5	384.146	542.12	C[Si](C)(C)O[Si](C)(C)O[Si](C)(C)O[Si](C)(C)O[Si](C)(C)C	InChI=1/C12H36O4Si5/c1-17(2,3)13-19(7,8)15-21(11,12)16-20(9,10)14-18(4,5)6/h1-12H3
	121	Phosphoric acid, bis(trimethylsilyl) 2,3-bis[(trimethylsilyl)oxy]propyl ester	31038-11-6	C15H41O6PSi4	460.172	1101.34	C[Si](C)(C)OCC(CO[P](=O)(O[Si](C)(C)C)O[Si](C)(C)C)O[Si](C)(C)C	InChI=1/C15H41O6PSi4/c1-23(2,3)18-14-15(19-24(4,5)6)13-17-22(16,20-25(7,8)9)21-26(10,11)12/h15H,13-14H2,1-12H3
	122	Phosphoric acid, bis(trimethylsilyl)monomethyl ester	18291-81-1	C7H21O4PSi2	256.072	545.109	CO[P](=O)(O[Si](C)(C)C)O[Si](C)(C)C	InChI=1/C7H21O4PSi2/c1-9-12(8,10-13(2,3)4)11-14(5,6)7/h1-7H3
	123	Propanoic acid, 2-(methoxyimino)-, trimethylsilyl ester	55493-92-0	C7H15NO3Si	189.082	404.295	CON=C(C)C(=O)O[Si](C)(C)C	InChI=1/C7H15NO3Si/c1-6(8-10-2)7(9)11-12(3,4)5/h1-5H3
	124	Propanoic acid, 2,2-dimethyl-, sodium salt	1184-88-9	C5H9NaO2	124.05	524.454	[Na+].CC(C)(C)C([O-])=O	InChI=1/C5H10O2.Na/c1-5(2,3)4(6)7;/h1-3H3,(H,6,7);/q;+1/p-1/fC5H9O2.Na/q-1;m
	125	Propanoic acid, 2-[(1-cyclohexylethyl)carbamoyl]-, ethyl ester	1000142-14-7	C14H25NO3	255.183	311.513	CCOC(=O)C(C)C(=O)NC(C)C1CCCCC1	InChI=1/C14H25NO3/c1-4-18-14(17)10(2)13(16)15-11(3)12-8-6-5-7-9-12/h10-12H,4-9H2,1-3H3,(H,15,16)/f/h15H
	126	pyrazino[2,3-b:5,6-b']diquinoxaline	1000400-04-5	C16H8N6	284.081	1288.14	c1ccc2nc3nc4nc5ccccc5nc4nc3nc2c1	InChI=1/C16H8N6/c1-2-6-10-9(5-1)17-13-14(18-10)22-16-15(21-13)19-11-7-3-4-8-12(11)20-16/h1-8H
	127	Pyrene	129-00-0	C16H10	202.078	928.979	c1cc2ccc3cccc4ccc(c1)c2c34	InChI=1/C16H10/c1-3-11-7-9-13-5-2-6-14-10-8-12(4-1)15(11)16(13)14/h1-10H
	128	Pyridine-3-carboxamide, 4-trifluoromethyl-6-methoxy-N-(2,4-dichloro-6-methylbenzyl)-N-methyl-	1000267-57-5	C17H15Cl2F3N2O2	406.046	1643.59	COc1cc(c(cn1)C(=O)N(C)Cc2c(C)cc(Cl)cc2Cl)C(F)(F)F	InChI=1/C17H15Cl2F3N2O2/c1-9-4-10(18)5-14(19)12(9)8-24(2)16(25)11-7-23-15(26-3)6-13(11)17(20,21)22/h4-7H,8H2,1-3H3
	129	Scyllo-Inositol, 6TMS derivative	14251-18-4	C24H60O6Si6	612.301	1307	OC1C(O)C(O)C(O)C(O)C1O	InChI=1/C6H12O6/c7-1-2(8)4(10)6(12)5(11)3(1)9/h1-12H
	130	Silane, cyclohexyldimethoxymethyl-	17865-32-6	C9H20O2Si	188.123	520.962	COC(OC)[SiH2]C1CCCCC1	InChI=1/C9H20O2Si/c1-10-9(11-2)12-8-6-4-3-5-7-8/h8-9H,3-7,12H2,1-2H3
	131	Silane, diethylheptyloxynonyloxy-	1000363-08-9	C20H44O2Si	344.311	1414.85	CCCCCCCOCCCCCCCCCO[SiH](CC)CC	InChI=1/C20H44O2Si/c1-4-7-8-12-15-18-21-19-16-13-10-9-11-14-17-20-22-23(5-2)6-3/h23H,4-20H2,1-3H3
	132	Silane, diethyloctadecyloxy(2-methoxyethoxy)-	1000363-54-7	C25H54O3Si	430.384	1746.96	CCCCCCCCCCCCCCCCCCO[Si](CC)(CC)OCCOC	InChI=1/C25H54O3Si/c1-5-8-9-10-11-12-13-14-15-16-17-18-19-20-21-22-23-27-29(6-2,7-3)28-25-24-26-4/h5-25H2,1-4H3
	133	Silanol, trimethyl-, carbonate (2:1)	39981-89-0	C7H18O3Si2	206.079	334.977	C[Si](C)(C)O.C[Si](C)(C)O.OC(O)=O	InChI=1/2C3H10OSi.CH2O3/c2*1-5(2,3)4;2-1(3)4/h2*4H,1-3H3;(H2,2,3,4)/f/h;;2-3H
	134	Silanol, trimethyl-, phosphate (3:1)	10497-05-9	C9H27O4PSi3	314.095	647.914	C[Si](C)(C)O.C[Si](C)(C)O.C[Si](C)(C)O.O[P](O)(O)=O	InChI=1/3C3H10OSi.H3O4P/c4*1-5(2,3)4/h3*4H,1-3H3;(H3,1,2,3,4)/f/h;;;1-3H
	135	Stearic acid, TMS derivative	18748-91-9	C21H44O2Si	356.311	1429.28	CCCCCCCCCCCCCCCCCC(O)=O	InChI=1/C18H36O2/c1-2-3-4-5-6-7-8-9-10-11-12-13-14-15-16-17-18(19)20/h2-17H2,1H3,(H,19,20)/f/h19H
	136	Succinic acid, 2,2,3,3,4,4,5,5-octafluoropentyl 1-cyclopentylethyl ester	1000391-40-8	C16H20F8O4	428.123	647.282	CC(OC(=O)CCC(=O)OCC(F)(F)C(F)(F)C(F)(F)C(F)F)C1CCCC1	InChI=1/C16H20F8O4/c1-9(10-4-2-3-5-10)28-12(26)7-6-11(25)27-8-14(19,20)16(23,24)15(21,22)13(17)18/h9-10,13H,2-8H2,1H3
	137	Succinic acid, 2,2,3,3,4,4,5,5-octafluoropentyl 4-octyl ester	1000389-55-4	C17H24F8O4	444.155	1417.38	CCCCCCCCOC(=O)CCC(=O)OCC(F)(F)C(F)(F)C(F)(F)C(F)F	InChI=1/C17H24F8O4/c1-2-3-4-5-6-7-10-28-12(26)8-9-13(27)29-11-15(20,21)17(24,25)16(22,23)14(18)19/h14H,2-11H2,1H3
	138	Tetrasiloxane, decamethyl-	141-62-8	C10H30O3Si4	310.127	395.879	C[Si](C)(C)O[Si](C)(C)O[Si](C)(C)O[Si](C)(C)C	InChI=1/C10H30O3Si4/c1-14(2,3)11-16(7,8)13-17(9,10)12-15(4,5)6/h1-10H3
	139	Timonacic, 2TMS derivative	71240-84-1	C10H23NO2SSi2	277.099	769.781	OC(=O)C1CSCN1	InChI=1/C4H7NO2S/c6-4(7)3-1-8-2-5-3/h3,5H,1-2H2,(H,6,7)/f/h6H
	140	Triisobutylaluminum	100-99-2	C12H27Al	198.193	583.705	CC(C)C[Al](CC(C)C)CC(C)C	InChI=1/3C4H9.Al/c3*1-4(2)3;/h3*4H,1H2,2-3H3;/rC12H27Al/c1-10(2)7-13(8-11(3)4)9-12(5)6/h10-12H,7-9H2,1-6H3
	141	Trimethylsilyl 3-((trimethylsilyl)thio)propanoate	1000385-85-7	C9H22O2SSi2	250.088	503.291	C[Si](C)(C)OC(=O)CCS[Si](C)(C)C	InChI=1/C9H22O2SSi2/c1-13(2,3)11-9(10)7-8-12-14(4,5)6/h7-8H2,1-6H3
	142	Trisiloxane, octamethyl-	107-51-7	C8H24O2Si3	236.108	697.525	C[Si](C)(C)O[Si](C)(C)O[Si](C)(C)C	InChI=1/C8H24O2Si3/c1-11(2,3)9-13(7,8)10-12(4,5)6/h1-8H3
	143	Tyrosine, 2TMS derivative	7536-83-6	C15H27NO3Si2	325.153	1187.52	N[C@@H](Cc1ccc(O)cc1)C(O)=O	InChI=1/C9H11NO3/c10-8(9(12)13)5-6-1-3-7(11)4-2-6/h1-4,8,11H,5,10H2,(H,12,13)/t8-/m0/s1/f/h12H
	144	Undecane	1120-21-4	C11H24	156.188	455.912	CCCCCCCCCCC	InChI=1/C11H24/c1-3-5-7-9-11-10-8-6-4-2/h3-11H2,1-2H3
	145	Undecane, 2,7-dimethyl-	17301-24-5	C13H28	184.219	565.904	CCCCC(C)CCCCC(C)C	InChI=1/C13H28/c1-5-6-10-13(4)11-8-7-9-12(2)3/h12-13H,5-11H2,1-4H3
	146	Undecane, 4,7-dimethyl-	17301-32-5	C13H28	184.219	1208.43	CCCCC(C)CCC(C)CCC	InChI=1/C13H28/c1-5-7-9-13(4)11-10-12(3)8-6-2/h12-13H,5-11H2,1-4H3
	147	Undecane, 4-ethyl-	17312-59-3	C13H28	184.219	627.107	CCCCCCCC(CC)CCC	InChI=1/C13H28/c1-4-7-8-9-10-12-13(6-3)11-5-2/h13H,4-12H2,1-3H3
	148	Undecane, 6-ethyl-	17312-60-6	C13H28	184.219	575.174	CCCCCC(CC)CCCCC	InChI=1/C13H28/c1-4-7-9-11-13(6-3)12-10-8-5-2/h13H,4-12H2,1-3H3
	149	Uracil, 2TMS derivative	10457-14-4	C10H20N2O2Si2	256.106	711.42	O=C1NC=CC(=O)N1	InChI=1/C4H4N2O2/c7-3-1-2-5-4(8)6-3/h1-2H,(H2,5,6,7,8)/f/h5-6H
	150	Urea, 2TMS derivative	18297-63-7	C7H20N2OSi2	204.111	608.784	NC(N)=O	InChI=1/CH4N2O/c2-1(3)4/h(H4,2,3,4)/f/h2-3H2
	151	Uridine, 3TMS derivative	10457-16-6	C18H36N2O6Si3	460.188	1571.01	OC[C@H]1O[C@H]([C@H](O)[C@@H]1O)N2C=CC(=O)NC2=O	InChI=1/C9H12N2O6/c12-3-4-6(14)7(15)8(17-4)11-2-1-5(13)10-9(11)16/h1-2,4,6-8,12,14-15H,3H2,(H,10,13,16)/t4-,6-,7-,8-/m1/s1/f/h10H
	152	Xylitol, 5TMS derivative	14199-72-5	C20H52O5Si5	512.266	1060.52	OC[C@@H](O)[C@H](O)[C@@H](O)CO	InChI=1/C5H12O5/c6-1-3(8)5(10)4(9)2-7/h3-10H,1-2H2/t3-,4+,5+
kidney	1	(.+/-.)-3-Hydroxybutyric acid, 2TMS derivative	1000333-75-4	C10H24O3Si2	248.126	523.853
	2	(E)-2,4'-Bis(methoxymethoxy)-stilbene	115032-47-8	C18H20O4	300.136	669.729	COCOc1ccc(cc1)/C=C/c2ccccc2OCOC	InChI=1/C18H20O4/c1-19-13-21-17-11-8-15(9-12-17)7-10-16-5-3-4-6-18(16)22-14-20-2/h3-12H,13-14H2,1-2H3/b10-7+
	3	[1,1'-Biphenyl]-4,4'-diamine, N,N'-diphenyl-	531-91-9	C24H20N2	336.163	1414.45	N(c1ccccc1)c2ccc(cc2)c3ccc(Nc4ccccc4)cc3	InChI=1/C24H20N2/c1-3-7-21(8-4-1)25-23-15-11-19(12-16-23)20-13-17-24(18-14-20)26-22-9-5-2-6-10-22/h1-18,25-26H
	4	{4-Methoxy-2-[(trimethylsilyl)oxy]phenyl}(4-methylphenyl)methanone	1000408-24-6	C18H22O3Si	314.134	713.129	COc1ccc(C(=O)c2ccc(C)cc2)c(O[Si](C)(C)C)c1	InChI=1/C18H22O3Si/c1-13-6-8-14(9-7-13)18(19)16-11-10-15(20-2)12-17(16)21-22(3,4)5/h6-12H,1-5H3
	5	1-(p-Methoxyphenyl)-2-phenylbenzimidazole	94542-54-8	C20H16N2O	300.126	788.154	COc1ccc(cc1)n2c3ccccc3nc2c4ccccc4	InChI=1/C20H16N2O/c1-23-17-13-11-16(12-14-17)22-19-10-6-5-9-18(19)21-20(22)15-7-3-2-4-8-15/h2-14H,1H3
	6	1,2,3-Thiadiazole, 5-methyl-	50406-54-7	C3H4N2S	100.01	839.828	Cc1snnc1	InChI=1/C3H4N2S/c1-3-2-4-5-6-3/h2H,1H3
	7	1,2,4,5-Tetroxane, 3,3,6,6-tetramethyl-	1073-91-2	C6H12O4	148.074	335.416	CC1(C)OOC(C)(C)OO1	InChI=1/C6H12O4/c1-5(2)7-9-6(3,4)10-8-5/h1-4H3
	8	1,2-Cyclohexanedicarboxylic acid, 4-bromophenyl nonyl ester	1000339-63-2	C23H33BrO4	452.156	1993.5	CCCCCCCCCOC(=O)C1CCCCC1C(=O)Oc2ccc(Br)cc2	InChI=1/C23H33BrO4/c1-2-3-4-5-6-7-10-17-27-22(25)20-11-8-9-12-21(20)23(26)28-19-15-13-18(24)14-16-19/h13-16,20-21H,2-12,17H2,1H3
	9	1,3,5-Triazin-2-amine, 4-(2,2,2-trifluoroethoxy)-6-methoxy-N-phenyl-	1000277-96-0	C12H11F3N4O2	300.083	797.391	COc1nc(Nc2ccccc2)nc(OCC(F)(F)F)n1	InChI=1/C12H11F3N4O2/c1-20-10-17-9(16-8-5-3-2-4-6-8)18-11(19-10)21-7-12(13,14)15/h2-6H,7H2,1H3,(H,16,17,18,19)/f/h16H
	10	1,3-Dioxolane, 2-methyl-2-pentyl-	4352-95-8	C9H18O2	158.131	443.863	CCCCCC1(C)OCCO1	InChI=1/C9H18O2/c1-3-4-5-6-9(2)10-7-8-11-9/h3-8H2,1-2H3
	11	1,4-Butanediol, 2TMS derivative	18001-91-7	C10H26O2Si2	234.147	784.249	OCCCCO	InChI=1/C4H10O2/c5-3-1-2-4-6/h5-6H,1-4H2
	12	1,5-Anhydrohexitol, 4TMS derivative	1000380-13-8	C18H44O5Si4	452.227	1170.96	OCC1OCC(O)C(O)C1O	InChI=1/C6H12O5/c7-1-4-6(10)5(9)3(8)2-11-4/h3-10H,1-2H2
	13	11-Octadecenoic acid, (Z)-, TMS derivative	1000333-60-2	C21H42O2Si	354.295	1417.44	CCCCCC\C=C/CCCCCCCCCC(O)=O	InChI=1/C18H34O2/c1-2-3-4-5-6-7-8-9-10-11-12-13-14-15-16-17-18(19)20/h7-8H,2-6,9-17H2,1H3,(H,19,20)/b8-7-/f/h19H
	14	1-Hexadecanol, TMS derivative	6221-90-5	C19H42OSi	314.3	1235.2	CCCCCCCCCCCCCCCCO	InChI=1/C16H34O/c1-2-3-4-5-6-7-8-9-10-11-12-13-14-15-16-17/h17H,2-16H2,1H3
	15	1-Monopalmitin, 2TMS derivative	1188-74-5	C25H54O4Si2	474.356	1642.83	CCCCCCCCCCCCCCCC(=O)OCC(O)CO	InChI=1/C19H38O4/c1-2-3-4-5-6-7-8-9-10-11-12-13-14-15-19(22)23-17-18(21)16-20/h18,20-21H,2-17H2,1H3
	16	1-Octadecanol, TMS derivative	18748-98-6	C21H46OSi	342.332	1371.29	CCCCCCCCCCCCCCCCCCO	InChI=1/C18H38O/c1-2-3-4-5-6-7-8-9-10-11-12-13-14-15-16-17-18-19/h19H,2-18H2,1H3
	17	2-(4-Pyrrol2-[4-(2-hydroxy-ethoxy)-phenyl]-vinylmorpho-phenoxy)-ethanol	1000317-94-9	C18H20O4	300.136	672.211	OCCOc1ccc(cc1)/C=C/c2ccc(OCCO)cc2	InChI=1/C18H20O4/c19-11-13-21-17-7-3-15(4-8-17)1-2-16-5-9-18(10-6-16)22-14-12-20/h1-10,19-20H,11-14H2/b2-1+
	18	2,2'-Spirobis(naphtho[1,8-de][1,3]dioxin)	1000157-41-6	C21H12O4	328.074	1363.4	O1c2cccc3cccc(OC14Oc5cccc6cccc(O4)c56)c23	InChI=1/C21H12O4/c1-5-13-6-2-10-16-19(13)15(9-1)22-21(23-16)24-17-11-3-7-14-8-4-12-18(25-21)20(14)17/h1-12H
	19	2,4(1H,3H)-Pyrimidinedione, 5-(trifluoromethyl)-	54-20-6	C5H3F3N2O2	180.015	970.035	FC(F)(F)C1=CNC(=O)NC1=O	InChI=1/C5H3F3N2O2/c6-5(7,8)2-1-9-4(12)10-3(2)11/h1H,(H2,9,10,11,12)/f/h9-10H
	20	2,4,6-Tri-t-butylbenzenethiol	961-39-7	C18H30S	278.207	904.389	CC(C)(C)c1cc(c(S)c(c1)C(C)(C)C)C(C)(C)C	InChI=1/C18H30S/c1-16(2,3)12-10-13(17(4,5)6)15(19)14(11-12)18(7,8)9/h10-11,19H,1-9H3
	21	2,5-Di(trifluoromethyl)benzoic acid, 3-pentadecyl ester	1000338-71-0	C24H34F6O2	468.246	608.244	CCCCCCCCCCCCC(CC)OC(=O)c1cc(ccc1C(F)(F)F)C(F)(F)F	InChI=1/C24H34F6O2/c1-3-5-6-7-8-9-10-11-12-13-14-19(4-2)32-22(31)20-17-18(23(25,26)27)15-16-21(20)24(28,29)30/h15-17,19H,3-14H2,1-2H3
	22	2,5-Di(trifluoromethyl)benzoic acid, 5-tridecyl ester	1000338-70-3	C22H30F6O2	440.215	571.87	CCCCCCCCC(CCCC)OC(=O)c1cc(ccc1C(F)(F)F)C(F)(F)F	InChI=1/C22H30F6O2/c1-3-5-7-8-9-10-12-17(11-6-4-2)30-20(29)18-15-16(21(23,24)25)13-14-19(18)22(26,27)28/h13-15,17H,3-12H2,1-2H3
	23	2,5-Hexanediol, 2TMS derivative	66956-94-3	C12H30O2Si2	262.178	396.458	CC(O)CCC(C)O	InChI=1/C6H14O2/c1-5(7)3-4-6(2)8/h5-8H,3-4H2,1-2H3
	24	2-Butenedioic acid, (E)-, 2TMS derivative	17962-03-7	C10H20O4Si2	260.09	715.966	OC(=O)/C=C/C(O)=O	InChI=1/C4H4O4/c5-3(6)1-2-4(7)8/h1-2H,(H,5,6)(H,7,8)/b2-1+/f/h5,7H
	25	2-Fluorobenzylamine, diundecyl	1000310-31-9	C29H52FN	433.408	931.488	CCCCCCCCCCCN(CCCCCCCCCCC)Cc1ccccc1F	InChI=1/C29H52FN/c1-3-5-7-9-11-13-15-17-21-25-31(27-28-23-19-20-24-29(28)30)26-22-18-16-14-12-10-8-6-4-2/h19-20,23-24H,3-18,21-22,25-27H2,1-2H3
	26	2H-1,3-Benzoxazine-2,4(3H)-dione, 3-methyl-	1672-01-1	C9H7NO3	177.043	907.063	CN1C(=O)Oc2ccccc2C1=O	InChI=1/C9H7NO3/c1-10-8(11)6-4-2-3-5-7(6)13-9(10)12/h2-5H,1H3
	27	2H-1-Benzopyran-3,4-diol, 2-(3,4-dimethoxyphenyl)-3,4-dihydro-7-methoxy-, 4-acetate, (2.alpha.,3.beta.,4.alpha.)-(+)-	55670-14-9	C20H22O7	374.137	1295.64	COc1ccc2C(OC(C)=O)C(O)C(Oc2c1)c3ccc(OC)c(OC)c3	InChI=1/C20H22O7/c1-11(21)26-20-14-7-6-13(23-2)10-16(14)27-19(18(20)22)12-5-8-15(24-3)17(9-12)25-4/h5-10,18-20,22H,1-4H3
	28	2-Methyl-1,4-bis(trimethylsiloxy)butane	105747-05-5	C11H28O2Si2	248.163	556.562	CC(CCO[Si](C)(C)C)CO[Si](C)(C)C	InChI=1/C11H28O2Si2/c1-11(10-13-15(5,6)7)8-9-12-14(2,3)4/h11H,8-10H2,1-7H3
	29	3,5,7-Trihydroxy-4'-methoxyflavone	491-54-3	C16H12O6	300.063	771.604	COc1ccc(cc1)C2=C(O)C(=O)c3c(O)cc(O)cc3O2	InChI=1/C16H12O6/c1-21-10-4-2-8(3-5-10)16-15(20)14(19)13-11(18)6-9(17)7-12(13)22-16/h2-7,17-18,20H,1H3
	30	3-Ethoxy-4-hydroxymandelic acid, 3TMS derivative	1000292-73-1	C19H36O5Si3	428.187	1999.07	CCOc1cc(ccc1O)C(O)C(O)=O	InChI=1/C10H12O5/c1-2-15-8-5-6(3-4-7(8)11)9(12)10(13)14/h3-5,9,11-12H,2H2,1H3,(H,13,14)/f/h13H
	31	4-piperidinol, 4-hexadecyl-1-(hexadecyloxy)-2,2,6,6-tetramethyl-	1000399-90-8	C41H83NO2	621.642	587.963	CCCCCCCCCCCCCCCCON1C(C)(C)CC(O)(CCCCCCCCCCCCCCCC)CC1(C)C	InChI=1/C41H83NO2/c1-7-9-11-13-15-17-19-21-23-25-27-29-31-33-35-41(43)37-39(3,4)42(40(5,6)38-41)44-36-34-32-30-28-26-24-22-20-18-16-14-12-10-8-2/h43H,7-38H2,1-6H3
	32	4-Pyridinol, TMS derivative	1000352-50-3	C8H13NOSi	167.077	387.508	Oc1ccncc1	InChI=1/C5H5NO/c7-5-1-3-6-4-2-5/h1-4H,(H,6,7)/f/h7H
	33	5,5'-Propylenebis[(1H-1,2,4-triazol-3-yl)amine], 4TMS derivative	1000332-45-5	C19H44N8Si4	496.277	559.697	CC(Cc1[nH]nc(N)n1)c2[nH]nc(N)n2	InChI=1/C7H12N8/c1-3(5-11-7(9)15-13-5)2-4-10-6(8)14-12-4/h3H,2H2,1H3,(H3,8,10,12,14)(H3,9,11,13,15)/f/h12-13H,8-9H2
	34	5,7-Dihydroxy-3-[2,3-dihydro-4-hydroxy-2-(2-hydroxyisopropyl)benzofuran-7-yl]chromone	99347-41-8	C20H18O7	370.105	1903.18	CC(C)(O)C1Cc2c(O)ccc(c2O1)C3=COc4cc(O)cc(O)c4C3=O	InChI=1/C20H18O7/c1-20(2,25)16-7-11-13(22)4-3-10(19(11)27-16)12-8-26-15-6-9(21)5-14(23)17(15)18(12)24/h3-6,8,16,21-23,25H,7H2,1-2H3
	35	5-Hydroxy-2,2,6,6-tetramethyl-4-hepten-3-one, Isomer 1, TBDMS derivative	1000376-29-5	C17H34O2Si	298.233	570.163
	36	9-Hexadecenoic acid, (Z)-, TBDMS derivative	1000333-19-7	C22H44O2Si	368.311	1992.78	CCCCCC\C=C/CCCCCCCC(O)=O	InChI=1/C16H30O2/c1-2-3-4-5-6-7-8-9-10-11-12-13-14-15-16(17)18/h7-8H,2-6,9-15H2,1H3,(H,17,18)/b8-7-/f/h17H
	37	9-Octadecenoic acid, (E)-, TMS derivative	96851-47-7	C21H42O2Si	354.295	1413.25	CCCCCCCC/C=C/CCCCCCCC(O)=O	InChI=1/C18H34O2/c1-2-3-4-5-6-7-8-9-10-11-12-13-14-15-16-17-18(19)20/h9-10H,2-8,11-17H2,1H3,(H,19,20)/b10-9+/f/h19H
	38	Acridin-9-yl-(4-methoxy-phenyl)-amine	1000317-35-5	C20H16N2O	300.126	691.259	COc1ccc(Nc2c3ccccc3nc4ccccc24)cc1	InChI=1/C20H16N2O/c1-23-15-12-10-14(11-13-15)21-20-16-6-2-4-8-18(16)22-19-9-5-3-7-17(19)20/h2-13H,1H3,(H,21,22)/f/h21H
	39	Adipic acid, 4-biphenyl butyl ester	1000353-92-3	C22H26O4	354.183	322.221
	40	Adonitol, 5TMS derivative	35-22-3	C20H52O5Si5	512.266	1074.66	OCC(O)C(O)C(O)CO	InChI=1/C5H12O5/c6-1-3(8)5(10)4(9)2-7/h3-10H,1-2H2
	41	Aminomalonic acid, tris(trimethylsilyl)-	1000079-52-5	C12H29NO4Si3	335.14	842.245	C[Si](C)(C)OC(=O)C(N)(C(=O)O[Si](C)(C)C)[Si](C)(C)C	InChI=1/C12H29NO4Si3/c1-18(2,3)12(13,10(14)16-19(4,5)6)11(15)17-20(7,8)9/h13H2,1-9H3
	42	Apazone	13539-59-8	C16H20N4O2	300.159	673.78	CCCC1C(=O)N2N(C1=O)C(=Nc3ccc(C)cc23)N(C)C	InChI=1/C16H20N4O2/c1-5-6-11-14(21)19-13-9-10(2)7-8-12(13)17-16(18(3)4)20(19)15(11)22/h7-9,11H,5-6H2,1-4H3
	43	Arachidonic acid, TMS derivative	113516-18-0	C23H40O2Si	376.28	1510.64	CCCCC/C=C\C\C=C/C/C=C\C\C=C/CCCC(O)=O	InChI=1/C20H32O2/c1-2-3-4-5-6-7-8-9-10-11-12-13-14-15-16-17-18-19-20(21)22/h6-7,9-10,12-13,15-16H,2-5,8,11,14,17-19H2,1H3,(H,21,22)/b7-6-,10-9-,13-12-,16-15-/f/h21H
	44	Benzenamine, 3,3'-[sulfonylbis(4,1-phenyleneoxy)]bis-	30203-11-3	C24H20N2O4S	432.114	1350.28	Nc1cccc(Oc2ccc(cc2)[S](=O)(=O)c3ccc(Oc4cccc(N)c4)cc3)c1	InChI=1/C24H20N2O4S/c25-17-3-1-5-21(15-17)29-19-7-11-23(12-8-19)31(27,28)24-13-9-20(10-14-24)30-22-6-2-4-18(26)16-22/h1-16H,25-26H2
	45	benzenamine, 4-ethenyl-N,N-bis(4-methylphenyl)-	1000402-13-9	C22H21N	299.167	796.036	Cc1ccc(cc1)N(c2ccc(C)cc2)c3ccc(C=C)cc3	InChI=1/C22H21N/c1-4-19-9-15-22(16-10-19)23(20-11-5-17(2)6-12-20)21-13-7-18(3)8-14-21/h4-16H,1H2,2-3H3
	46	Benzene, 1,1'-(1-phenyl-1,2-ethenediyl)bis[4-methoxy-	25346-95-6	C22H20O2	316.146	647.522	COc1ccc(cc1)C=C(c2ccccc2)c3ccc(OC)cc3	InChI=1/C22H20O2/c1-23-20-12-8-17(9-13-20)16-22(18-6-4-3-5-7-18)19-10-14-21(24-2)15-11-19/h3-16H,1-2H3
	47	Benzene, 1,3-bis(1,1-dimethylethyl)-	1014-60-4	C14H22	190.172	620.667	CC(C)(C)c1cccc(c1)C(C)(C)C	InChI=1/C14H22/c1-13(2,3)11-8-7-9-12(10-11)14(4,5)6/h7-10H,1-6H3
	48	Benzenepropanoic acid, 3,5-bis(1,1-dimethylethyl)-4-hydroxy-, octadecyl ester	2082-79-3	C35H62O3	530.47	1830.42	CCCCCCCCCCCCCCCCCCOC(=O)CCc1cc(c(O)c(c1)C(C)(C)C)C(C)(C)C	InChI=1/C35H62O3/c1-8-9-10-11-12-13-14-15-16-17-18-19-20-21-22-23-26-38-32(36)25-24-29-27-30(34(2,3)4)33(37)31(28-29)35(5,6)7/h27-28,37H,8-26H2,1-7H3
	49	Benzoic acid, 4-(dimethylamino)-, 2-oxo-2-phenylethyl ester	55153-13-4	C17H17NO3	283.121	638.849	CN(C)c1ccc(cc1)C(=O)OCC(=O)c2ccccc2	InChI=1/C17H17NO3/c1-18(2)15-10-8-14(9-11-15)17(20)21-12-16(19)13-6-4-3-5-7-13/h3-11H,12H2,1-2H3
	50	Bisphenol A monomethyl ether, TMS derivative	1000283-55-5	C19H26O2Si	314.17	727.068	COC.CC(C)(c1ccc(O)cc1)c2ccc(O)cc2	InChI=1/C15H16O2.C2H6O/c1-15(2,11-3-7-13(16)8-4-11)12-5-9-14(17)10-6-12;1-3-2/h3-10,16-17H,1-2H3;1-2H3
	51	Bisphenol A, 2TMS derivative	4387-16-0	C21H32O2Si2	372.194	1420.56	CC(C)(c1ccc(O)cc1)c2ccc(O)cc2	InChI=1/C15H16O2/c1-15(2,11-3-7-13(16)8-4-11)12-5-9-14(17)10-6-12/h3-10,16-17H,1-2H3
	52	Boron, (2-benzimidoylpropiophenonato)diethyl-	21205-45-8	C20H24BNO	305.195	894.253
	53	Butanedioic acid, 2TMS derivative	40309-57-7	C10H22O4Si2	262.106	683.051	OC(=O)CCC(O)=O	InChI=1/C4H6O4/c5-3(6)1-2-4(7)8/h1-2H2,(H,5,6)(H,7,8)/f/h5,7H
	54	Carbamic acid, methyl ester	598-55-0	C2H5NO2	75.032	353.526	COC(N)=O	InChI=1/C2H5NO2/c1-5-2(3)4/h1H3,(H2,3,4)/f/h3H2
	55	Cholestan-3-ol, (3.beta.,5.alpha.)-, TMS derivative	18880-51-8	C30H56OSi	460.41	1956.79	CC(C)CCC[C@@H](C)[C@H]1CC[C@H]2[C@@H]3CC[C@H]4C[C@@H](O)CC[C@]4(C)[C@H]3CC[C@]12C	InChI=1/C27H48O/c1-18(2)7-6-8-19(3)23-11-12-24-22-10-9-20-17-21(28)13-15-26(20,4)25(22)14-16-27(23,24)5/h18-25,28H,6-17H2,1-5H3/t19-,20+,21+,22+,23-,24+,25+,26+,27-/m1/s1
	56	Cholesterol, TMS derivative	1856-05-9	C30H54OSi	458.394	1950.84	CC(C)CCC[C@@H](C)[C@H]1CC[C@H]2[C@@H]3CC=C4C[C@@H](O)CC[C@]4(C)[C@H]3CC[C@]12C	InChI=1/C27H46O/c1-18(2)7-6-8-19(3)23-11-12-24-22-10-9-20-17-21(28)13-15-26(20,4)25(22)14-16-27(23,24)5/h9,18-19,21-25,28H,6-8,10-17H2,1-5H3/t19-,21+,22+,23-,24+,25+,26+,27-/m1/s1
	57	Conanine, (5.alpha.)-	468-33-7	C22H37N	315.293	662.999	CC1C2CCC3C4CCC5CCCCC5(C)C4CCC23CN1C	InChI=1/C22H37N/c1-15-18-9-10-20-17-8-7-16-6-4-5-12-21(16,2)19(17)11-13-22(18,20)14-23(15)3/h15-20H,4-14H2,1-3H3
	58	Cyclohexane-1,2-dicarboxylic acid, bis-(benzyl-phenyl-amide)	1000189-68-4	C34H34N2O2	502.262	1383.26	O=C(C1CCCCC1C(=O)N(Cc2ccccc2)c3ccccc3)N(Cc4ccccc4)c5ccccc5	InChI=1/C34H34N2O2/c37-33(35(29-19-9-3-10-20-29)25-27-15-5-1-6-16-27)31-23-13-14-24-32(31)34(38)36(30-21-11-4-12-22-30)26-28-17-7-2-8-18-28/h1-12,15-22,31-32H,13-14,23-26H2
	59	D-(-)-Lactic acid, 2TMS derivative	1000333-99-1	C9H22O3Si2	234.111	417.231	C[C@@H](O)C(O)=O	InChI=1/C3H6O3/c1-2(4)3(5)6/h2,4H,1H3,(H,5,6)/t2-/m1/s1/f/h5H
	60	D-(+)-Talose, pentakis(trimethylsilyl) ether, methyloxime (anti)	1000380-18-8	C22H55NO6Si5	569.288	1226.47
	61	D-Allose, oxime (isomer 1), 6TMS derivative	1000380-40-9	C24H61NO6Si6	627.311	1387.18
	62	D-Allose, pentakis(trimethylsilyl) ether, methyloxime (syn)	1000380-19-7	C22H55NO6Si5	569.288	1203.47
	63	D-Arabinose, tetrakis(trimethylsilyl) ether, ethyloxime (isomer 2)	1000394-64-9	C19H47NO5Si4	481.253	1035.46
	64	Decan-2-ol, dimethylpentafluorophenylsilyl ether	1000367-89-8	C18H27F5OSi	382.175	842.351
	65	Decane	124-18-5	C10H22	142.172	347.359	CCCCCCCCCC	InChI=1/C10H22/c1-3-5-7-9-10-8-6-4-2/h3-10H2,1-2H3
	66	Dehydroabietic acid, TMS derivative	21414-49-3	C23H36O2Si	372.248	1529.38	CC(C)c1ccc2c(CC[C@H]3[C@@](C)(CCC[C@]23C)C(O)=O)c1	InChI=1/C20H28O2/c1-13(2)14-6-8-16-15(12-14)7-9-17-19(16,3)10-5-11-20(17,4)18(21)22/h6,8,12-13,17H,5,7,9-11H2,1-4H3,(H,21,22)/t17-,19-,20-/m1/s1/f/h21H
	67	D-Gluconic acid, 6TMS derivative	34290-52-3	C24H60O7Si6	628.295	1263.3	OC[C@@H](O)[C@@H](O)[C@H](O)[C@@H](O)C(O)=O	InChI=1/C6H12O7/c7-1-2(8)3(9)4(10)5(11)6(12)13/h2-5,7-11H,1H2,(H,12,13)/t2-,3-,4+,5-/m1/s1/f/h12H
	68	d-Glucose, 2,3,4,5,6-pentakis-O-(trimethylsilyl)-, o-methyloxyme, (1Z)-	128705-73-7	C22H55NO6Si5	569.288	1212.89	CO\N=C/C(O[Si](C)(C)C)C(O[Si](C)(C)C)C(O[Si](C)(C)C)C(CO[Si](C)(C)C)O[Si](C)(C)C	InChI=1/C22H55NO6Si5/c1-24-23-17-19(26-31(5,6)7)21(28-33(11,12)13)22(29-34(14,15)16)20(27-32(8,9)10)18-25-30(2,3)4/h17,19-22H,18H2,1-16H3/b23-17-
	69	D-Mannitol, 6TMS derivative	14317-07-8	C24H62O6Si6	614.316	1437.92	OC[C@@H](O)[C@@H](O)[C@H](O)[C@H](O)CO	InChI=1/C6H14O6/c7-1-3(9)5(11)6(12)4(10)2-8/h3-12H,1-2H2/t3-,4-,5-,6-/m1/s1
	70	D-Myo-Inositol, 1,2,4,5,6-pentakis-O-(trimethylsilyl)-, bis(trimethylsilyl) phosphate	55568-91-7	C27H69O9PSi7	764.306	1564.7	C[Si](C)(C)OC1C(O[Si](C)(C)C)C(O[Si](C)(C)C)C(O[P](=O)(O[Si](C)(C)C)O[Si](C)(C)C)C(O[Si](C)(C)C)C1O[Si](C)(C)C	InChI=1/C27H69O9PSi7/c1-38(2,3)30-23-22(29-37(28,35-43(16,17)18)36-44(19,20)21)24(31-39(4,5)6)26(33-41(10,11)12)27(34-42(13,14)15)25(23)32-40(7,8)9/h22-27H,1-21H3
	71	Doconexent, TMS derivative	1000333-23-8	C25H40O2Si	400.28	1623.49	CC\C=C/C/C=C\C\C=C/C/C=C\C\C=C/C/C=C\CCC(O)=O	InChI=1/C22H32O2/c1-2-3-4-5-6-7-8-9-10-11-12-13-14-15-16-17-18-19-20-21-22(23)24/h3-4,6-7,9-10,12-13,15-16,18-19H,2,5,8,11,14,17,20-21H2,1H3,(H,23,24)/b4-3-,7-6-,10-9-,13-12-,16-15-,19-18-/f/h23H
	72	Dodecane	112-40-3	C12H26	170.203	559.952	CCCCCCCCCCCC	InChI=1/C12H26/c1-3-5-7-9-11-12-10-8-6-4-2/h3-12H2,1-2H3
	73	Dodecane, 5-methyl-	17453-93-9	C13H28	184.219	414.106	CCCCCCCC(C)CCCC	InChI=1/C13H28/c1-4-6-8-9-10-12-13(3)11-7-5-2/h13H,4-12H2,1-3H3
	74	D-Pinitol, pentakis(trimethylsilyl) ether	1000380-13-4	C22H54O6Si5	554.277	1285.39
	75	Dulcitol, 6TMS derivative	35-23-4	C24H62O6Si6	614.316	1242	OCC(O)C(O)C(O)C(O)CO	InChI=1/C6H14O6/c7-1-3(9)5(11)6(12)4(10)2-8/h3-12H,1-2H2
	76	Eicosane, 1-iodo-	1000406-31-8	C20H41I	408.225	854.384	CCCCCCCCCCCCCCCCCCCCI	InChI=1/C20H41I/c1-2-3-4-5-6-7-8-9-10-11-12-13-14-15-16-17-18-19-20-21/h2-20H2,1H3
	77	Estra-1,3,5(10)-trien-17-one, 3-hydroxy-2-methoxy-	362-08-3	C19H24O3	300.173	676.872	COc1cc2[C@H]3CC[C@@]4(C)[C@@H](CCC4=O)[C@@H]3CCc2cc1O	InChI=1/C19H24O3/c1-19-8-7-12-13(15(19)5-6-18(19)21)4-3-11-9-16(20)17(22-2)10-14(11)12/h9-10,12-13,15,20H,3-8H2,1-2H3/t12-,13+,15-,19-/m0/s1
	78	Ethyl N-hydroxyacetimidate	10576-12-2	C4H9NO2	103.063	342.205	CCOC(C)=NO	InChI=1/C4H9NO2/c1-3-7-4(2)5-6/h6H,3H2,1-2H3
	79	Ethylphosphonic acid, 2TMS derivative	17882-98-3	C8H23O4PSi2	270.087	961.154	CC[P](O)(O)=O	InChI=1/C2H7O3P/c1-2-6(3,4)5/h2H2,1H3,(H2,3,4,5)/f/h3-4H
	80	Glycerol monostearate, 2TMS derivative	1188-75-6	C27H58O4Si2	502.387	1747.59	CCCCCCCCCCCCCCCCCC(O)=O.OCC(O)CO	InChI=1/C18H36O2.C3H8O3/c1-2-3-4-5-6-7-8-9-10-11-12-13-14-15-16-17-18(19)20;4-1-3(6)2-5/h2-17H2,1H3,(H,19,20);3-6H,1-2H2/f/h19H;
	81	Glycerol, 3TMS derivative	6787-10-06	C12H32O3Si3	308.166	648.905	OCC(O)CO	InChI=1/C3H8O3/c4-1-3(6)2-5/h3-6H,1-2H2
	82	Glycylglutamic acid, 2TMS derivative	1000333-69-4	C13H28N2O5Si2	348.154	892.861	NCC(=O)N[C@@H](CCC(O)=O)C(O)=O	InChI=1/C7H12N2O5/c8-3-5(10)9-4(7(13)14)1-2-6(11)12/h4H,1-3,8H2,(H,9,10)(H,11,12)(H,13,14)/t4-/m0/s1/f/h9,11,13H
	83	Heneicosane	629-94-7	C21H44	296.344	1040.84	CCCCCCCCCCCCCCCCCCCCC	InChI=1/C21H44/c1-3-5-7-9-11-13-15-17-19-21-20-18-16-14-12-10-8-6-4-2/h3-21H2,1-2H3
	84	Heptadecanoic acid, TMS derivative	55517-58-3	C20H42O2Si	342.295	1364.23	CCCCCCCCCCCCCCCCC(O)=O	InChI=1/C17H34O2/c1-2-3-4-5-6-7-8-9-10-11-12-13-14-15-16-17(18)19/h2-16H2,1H3,(H,18,19)/f/h18H
	85	Heptane, 3,3,5-trimethyl-	7154-80-5	C10H22	142.172	370.942	CCC(C)CC(C)(C)CC	InChI=1/C10H22/c1-6-9(3)8-10(4,5)7-2/h9H,6-8H2,1-5H3
	86	Hexane, 3,3-dimethyl-	563-16-6	C8H18	114.141	408.129	CCCC(C)(C)CC	InChI=1/C8H18/c1-5-7-8(3,4)6-2/h5-7H2,1-4H3
	87	L-5-Oxoproline, , 2TMS derivative	30274-77-2	C11H23NO3Si2	273.122	887.152
	88	L-Aspartic acid, 2TMS derivative	1000333-28-8	C10H23NO4Si2	277.117	793.796	N[C@@H](CC(O)=O)C(O)=O	InChI=1/C4H7NO4/c5-2(4(8)9)1-3(6)7/h2H,1,5H2,(H,6,7)(H,8,9)/t2-/m0/s1/f/h6,8H
	89	Linoelaidic acid, trimethylsilyl ester	1000395-58-1	C21H40O2Si	352.28	1409.7
	90	L-Leucine, TMS derivative	1000333-25-0	C9H21NO2Si	203.134	516.906	CC(C)C[C@H](N)C(O)=O	InChI=1/C6H13NO2/c1-4(2)3-5(7)6(8)9/h4-5H,3,7H2,1-2H3,(H,8,9)/t5-/m0/s1/f/h8H
	91	L-Serine, 2TMS derivative	70125-39-2	C9H23NO3Si2	249.122	627.306	N[C@@H](CO)C(O)=O	InChI=1/C3H7NO3/c4-2(1-5)3(6)7/h2,5H,1,4H2,(H,6,7)/t2-/m0/s1/f/h6H
	92	L-Threonic acid, tris(trimethylsilyl) ether, trimethylsilyl ester	1000352-53-3	C16H40O5Si4	424.195	931.466
	93	L-Threonine, 2TMS derivative	7536-82-5	C10H25NO3Si2	263.137	666.212	C[C@@H](O)[C@H](N)C(O)=O	InChI=1/C4H9NO3/c1-2(6)3(5)4(7)8/h2-3,6H,5H2,1H3,(H,7,8)/t2-,3+/m1/s1/f/h7H
	94	L-Valine, TMS derivative	7480-78-6	C8H19NO2Si	189.119	442.212	CC(C)[C@H](N)C(O)=O	InChI=1/C5H11NO2/c1-3(2)4(6)5(7)8/h3-4H,6H2,1-2H3,(H,7,8)/t4-/m0/s1/f/h7H
	95	Malic acid, 3TMS derivative	38166-11-9	C13H30O5Si3	350.14	859.442	OC(CC(O)=O)C(O)=O	InChI=1/C4H6O5/c5-2(4(8)9)1-3(6)7/h2,5H,1H2,(H,6,7)(H,8,9)/f/h6,8H
	96	Methyltris(trimethylsiloxy)silane	17928-28-8	C10H30O3Si4	310.127	395.732	C[Si](C)(C)O[Si](C)(O[Si](C)(C)C)O[Si](C)(C)C	InChI=1/C10H30O3Si4/c1-14(2,3)11-17(10,12-15(4,5)6)13-16(7,8)9/h1-10H3
	97	Muco-Inositol, 6TMS derivative	29412-26-8	C24H60O6Si6	612.301	1185.19	OC1C(O)C(O)C(O)C(O)C1O	InChI=1/C6H12O6/c7-1-2(8)4(10)6(12)5(11)3(1)9/h1-12H
	98	Myo-Inositol, 6TMS derivative	2582-79-8	C24H60O6Si6	612.301	1350.01	OC1C(O)C(O)C(O)C(O)C1O	InChI=1/C6H12O6/c7-1-2(8)4(10)6(12)5(11)3(1)9/h1-12H
	99	Myristic acid, TMS derivative	18603-17-3	C17H36O2Si	300.248	1151.42	CCCCCCCCCCCCCC(O)=O	InChI=1/C14H28O2/c1-2-3-4-5-6-7-8-9-10-11-12-13-14(15)16/h2-13H2,1H3,(H,15,16)/f/h15H
	100	Niacinamide, TBDMS derivative	1000374-74-4	C12H20N2OSi	236.134	851.946	NC(=O)c1cccnc1	InChI=1/C6H6N2O/c7-6(9)5-2-1-3-8-4-5/h1-4H,(H2,7,9)/f/h7H2
	101	N-Methoxy-N-methylamino-N,N-diethylaminomethane	90691-20-6	C7H18N2O	146.142	538.599	CCN(CC)CN(C)OC	InChI=1/C7H18N2O/c1-5-9(6-2)7-8(3)10-4/h5-7H2,1-4H3
	102	Palmitic Acid, TMS derivative	55520-89-3	C19H40O2Si	328.28	1296.6	CCCCCCCCCCCCCCCC(O)=O	InChI=1/C16H32O2/c1-2-3-4-5-6-7-8-9-10-11-12-13-14-15-16(17)18/h2-15H2,1H3,(H,17,18)/f/h17H
	103	Pentadecane, 2,6,10,14-tetramethyl-	1921-70-6	C19H40	268.313	1239.73	CC(C)CCCC(C)CCCC(C)CCCC(C)C	InChI=1/C19H40/c1-16(2)10-7-12-18(5)14-9-15-19(6)13-8-11-17(3)4/h16-19H,7-15H2,1-6H3
	104	Pentasiloxane, dodecamethyl-	141-63-9	C12H36O4Si5	384.146	542.162	C[Si](C)(C)O[Si](C)(C)O[Si](C)(C)O[Si](C)(C)O[Si](C)(C)C	InChI=1/C12H36O4Si5/c1-17(2,3)13-19(7,8)15-21(11,12)16-20(9,10)14-18(4,5)6/h1-12H3
	105	Phosphoric acid, bis(trimethylsilyl) 2,3-bis[(trimethylsilyl)oxy]propyl ester	31038-11-6	C15H41O6PSi4	460.172	1102.09	C[Si](C)(C)OCC(CO[P](=O)(O[Si](C)(C)C)O[Si](C)(C)C)O[Si](C)(C)C	InChI=1/C15H41O6PSi4/c1-23(2,3)18-14-15(19-24(4,5)6)13-17-22(16,20-25(7,8)9)21-26(10,11)12/h15H,13-14H2,1-12H3
	106	Phthalic acid, 4-methoxyphenyl 3-methylphenyl ester	1000315-68-0	C22H18O5	362.115	1530.17	COc1ccc(OC(=O)c2ccccc2C(=O)Oc3cccc(C)c3)cc1	InChI=1/C22H18O5/c1-15-6-5-7-18(14-15)27-22(24)20-9-4-3-8-19(20)21(23)26-17-12-10-16(25-2)11-13-17/h3-14H,1-2H3
	107	Propanoic acid, 2-(methoxyimino)-, trimethylsilyl ester	55493-92-0	C7H15NO3Si	189.082	404.712	CON=C(C)C(=O)O[Si](C)(C)C	InChI=1/C7H15NO3Si/c1-6(8-10-2)7(9)11-12(3,4)5/h1-5H3
	108	Propanoic acid, 2,2-dimethyl-, potassium salt	19455-23-3	C5H9KO2	140.024	1187.98
	109	Scyllo-Inositol, 6TMS derivative	14251-18-4	C24H60O6Si6	612.301	1307.07	OC1C(O)C(O)C(O)C(O)C1O	InChI=1/C6H12O6/c7-1-2(8)4(10)6(12)5(11)3(1)9/h1-12H
	110	Sedoheptulose, o-methyloxime, hexakis-O-(trimethylsilyl)-	1000298-66-2	C26H65NO7Si6	671.338	1384.2	CO\N=C(/CO[Si](C)(C)C)C(O[Si](C)(C)C)C(O[Si](C)(C)C)C(O[Si](C)(C)C)C(CO[Si](C)(C)C)O[Si](C)(C)C	InChI=1/C26H65NO7Si6/c1-28-27-22(20-29-35(2,3)4)24(32-38(11,12)13)26(34-40(17,18)19)25(33-39(14,15)16)23(31-37(8,9)10)21-30-36(5,6)7/h23-26H,20-21H2,1-19H3/b27-22+
	111	Silanamine, N,N'-methanetetraylbis[1,1,1-trimethyl-	1000-70-0	C7H18N2Si2	186.101	311.989	C[Si](C)(C)N=C=N[Si](C)(C)C	InChI=1/C7H18N2Si2/c1-10(2,3)8-7-9-11(4,5)6/h1-6H3
	112	Silane, diethyl(2-ethoxyethyloxy)tetradecyloxy-	1000363-52-6	C22H48O3Si	388.337	739.522	CCOCCOCCCCCCCCCCCCCCO[SiH](CC)CC	InChI=1/C22H48O3Si/c1-4-23-21-22-24-19-17-15-13-11-9-7-8-10-12-14-16-18-20-25-26(5-2)6-3/h26H,4-22H2,1-3H3
	113	Silane, diethyl(pentafluorobenzyloxy)tetradecyloxy-	1000363-22-9	C25H41F5O2Si	496.28	1518.86	CC[SiH](CC)OCCCCCCCCCCCCCCOC(F)(F)c1ccc(F)c(F)c1F	InChI=1/C25H41F5O2Si/c1-3-33(4-2)32-20-16-14-12-10-8-6-5-7-9-11-13-15-19-31-25(29,30)21-17-18-22(26)24(28)23(21)27/h17-18,33H,3-16,19-20H2,1-2H3
	114	Silane, diethylheptadecyloxy(2-phenylethoxy)-	1000363-17-2	C29H54O2Si	462.389	862.957	CCCCCCCCCCCCCCCCCO[Si](CC)(CC)OCCc1ccccc1	InChI=1/C29H54O2Si/c1-4-7-8-9-10-11-12-13-14-15-16-17-18-19-23-27-30-32(5-2,6-3)31-28-26-29-24-21-20-22-25-29/h20-22,24-25H,4-19,23,26-28H2,1-3H3
	115	Silane, diethylpentyloxyundecyloxy-	1000363-03-8	C20H44O2Si	344.311	678.168	CCCCCOCCCCCCCCCCCO[SiH](CC)CC	InChI=1/C20H44O2Si/c1-4-7-15-18-21-19-16-13-11-9-8-10-12-14-17-20-22-23(5-2)6-3/h23H,4-20H2,1-3H3
	116	Silane, dimethyldi(4-(2-phenylprop-2-yl)phenoxy)-	1000347-19-8	C32H36O2Si	480.248	1685.26	CC(C)(c1ccccc1)c2ccc(O[Si](C)(C)Oc3ccc(cc3)C(C)(C)c4ccccc4)cc2	InChI=1/C32H36O2Si/c1-31(2,25-13-9-7-10-14-25)27-17-21-29(22-18-27)33-35(5,6)34-30-23-19-28(20-24-30)32(3,4)26-15-11-8-12-16-26/h7-24H,1-6H3
	117	Silanol, trimethyl-, carbonate (2:1)	39981-89-0	C7H18O3Si2	206.079	335.297	C[Si](C)(C)O.C[Si](C)(C)O.OC(O)=O	InChI=1/2C3H10OSi.CH2O3/c2*1-5(2,3)4;2-1(3)4/h2*4H,1-3H3;(H2,2,3,4)/f/h;;2-3H
	118	Silanol, trimethyl-, phosphate (3:1)	10497-05-9	C9H27O4PSi3	314.095	648.448	C[Si](C)(C)O.C[Si](C)(C)O.C[Si](C)(C)O.O[P](O)(O)=O	InChI=1/3C3H10OSi.H3O4P/c4*1-5(2,3)4/h3*4H,1-3H3;(H3,1,2,3,4)/f/h;;;1-3H
	119	Stearic acid, TMS derivative	18748-91-9	C21H44O2Si	356.311	1429.4	CCCCCCCCCCCCCCCCCC(O)=O	InChI=1/C18H36O2/c1-2-3-4-5-6-7-8-9-10-11-12-13-14-15-16-17-18(19)20/h2-17H2,1H3,(H,19,20)/f/h19H
	120	Succinic acid, 2,2,3,3,4,4,5,5-octafluoropentyl 4-heptyl ester	1000390-46-6	C16H22F8O4	430.139	1296.91	CCCCCCCOC(=O)CCC(=O)OCC(F)(F)C(F)(F)C(F)(F)C(F)F	InChI=1/C16H22F8O4/c1-2-3-4-5-6-9-27-11(25)7-8-12(26)28-10-14(19,20)16(23,24)15(21,22)13(17)18/h13H,2-10H2,1H3
	121	Sulazepam	2898-13-7	C16H13ClN2S	300.049	678.46	CN1C(=S)CN=C(c2ccccc2)c3cc(Cl)ccc13	InChI=1/C16H13ClN2S/c1-19-14-8-7-12(17)9-13(14)16(18-10-15(19)20)11-5-3-2-4-6-11/h2-9H,10H2,1H3
	122	Thiodiglycol, 2TMS derivative	20486-03-7	C10H26O2SSi2	266.119	784.517	OCCSCCO	InChI=1/C4H10O2S/c5-1-3-7-4-2-6/h5-6H,1-4H2
	123	Trisiloxane, octamethyl-	107-51-7	C8H24O2Si3	236.108	697.525	C[Si](C)(C)O[Si](C)(C)O[Si](C)(C)C	InChI=1/C8H24O2Si3/c1-11(2,3)9-13(7,8)10-12(4,5)6/h1-8H3
	124	Tromethamine, 3TMS derivative	1000366-66-0	C13H35NO3Si3	337.192	785.477	NC(CO)(CO)CO	InChI=1/C4H11NO3/c5-4(1-6,2-7)3-8/h6-8H,1-3,5H2
	125	Undecane, 3,8-dimethyl-	17301-30-3	C13H28	184.219	455.828	CCCC(C)CCCCC(C)CC	InChI=1/C13H28/c1-5-9-13(4)11-8-7-10-12(3)6-2/h12-13H,5-11H2,1-4H3
	126	Uracil, 2TMS derivative	10457-14-4	C10H20N2O2Si2	256.106	711.37	O=C1NC=CC(=O)N1	InChI=1/C4H4N2O2/c7-3-1-2-5-4(8)6-3/h1-2H,(H2,5,6,7,8)/f/h5-6H
	127	Urea, 2TMS derivative	18297-63-7	C7H20N2OSi2	204.111	609.91	NC(N)=O	InChI=1/CH4N2O/c2-1(3)4/h(H4,2,3,4)/f/h2-3H2
	128	Uridine, 3TMS derivative	10457-16-6	C18H36N2O6Si3	460.188	1570.96	OC[C@H]1O[C@H]([C@H](O)[C@@H]1O)N2C=CC(=O)NC2=O	InChI=1/C9H12N2O6/c12-3-4-6(14)7(15)8(17-4)11-2-1-5(13)10-9(11)16/h1-2,4,6-8,12,14-15H,3H2,(H,10,13,16)/t4-,6-,7-,8-/m1/s1/f/h10H
	129	Xylitol, 5TMS derivative	14199-72-5	C20H52O5Si5	512.266	1060.53	OC[C@@H](O)[C@H](O)[C@@H](O)CO	InChI=1/C5H12O5/c6-1-3(8)5(10)4(9)2-7/h3-10H,1-2H2/t3-,4+,5+
